# Supplementary material for: Psychometric properties of the Children’s Revised Impact of Events Scale (CRIES) with Bangladeshi children and adolescents
Source: PeerJ. 2014 Aug 26;2:e536. doi: 10.7717/peerj.536 (PMC4157240; doi:10.7717/peerj.536)
Supplement: Supplemental Information 2 [file peerj-02-536-s002.xlsx]

## Sheet: CRIES_for_PeerJ
SR_num_ID	Child_age	Age_group	gender_of_child	typeofsservice	nameofinstitution	type_of_org	district_of_data_collection	what_does_Child_do	education_child_class	religion	Cries_13_item1	cries_13_item2	cries_13_item3	cries_13_item4	cries_13_item5	cries_13_item6	cries_13_item7	cries_13_item8	cries_13_item9	cries_13_item10	cries_13_item11	cries_13_item12	cries_13_item13	Cries_13_intrusion	cries_13_avoid	cries_13_arousal	cries_13_tot	sr_no	SCAS20_GAD_item1	SCAS20_GAD_item2	SCAS20_SepAnx_item3	SCAS20_SocPh_item4	SCAS20_SocPh_item5	SCAS20_SepAnx_item6	SCAS20_Panic_item7	SCAS20_SepAnx_item8	SCAS20_SepAnx_item9	SCAS20_OCD_item10	SCAS20_GAD_item11	SCAS20_GAD_item12	SCAS20_OCD_item13	SCAS20_SocPh_item14	SCAS20_Panic_item15	SCAS20_Panic_item16	SCAS20_Panic_item17	SCAS20_OCD_item18	SCAS20_OCD_item19	SCAS20_SocPh_item20	SCAS20_total
1	12	1	2	support_	BNWLA (D	2	Dhaka	1	6	1	3	1	5	5	5	0	5	1	3	5	5	5	3	16	12	23	51	1	0	0	2	0	1	1	1	2	1	3	1	3	2	3	3	0	0	0	0	1	21
2	12	1	2	support_	BNWLA (D	2	Dhaka	1	1	1	5	5	0	5	5	3	5	5	3	1	0	5	0	18	14	10	42	2	1	1	0	0	1	1	1	0	0	1	1	2	1	1	1	1	1	1	3	3	31
3	17	2	2	support_	BNWLA (D	2	Dhaka	1	10	1	5	5	5	5	3	5	5	5	3	5	1	3	3	18	20	15	53	3	3	1	0	1	0	1	1	0	0	3	2	3	3	0	0	0	1	3	3	3	27
4	17	2	2	support_	BNWLA (D	2	Dhaka	1	10	1	3	3	5	5	3	5	5	5	3	5	1	3	3	16	18	15	49	4	3	1	0	1	0	1	1	0	0	3	2	3	2	0	0	0	1	3	3	3	32
5	13	2	2	support_	BNWLA (D	2	Dhaka	1	10	1	5	5	5	3	5	5	5	5	3	5	1	3	5	16	20	19	55	5	3	1	0	1	0	1	1	0	0	2	3	2	3	0	3	3	0	2	3	3	18
6	11	1	2	support_	BNWLA (D	2	Dhaka	1	8	1	3	5	3	1	5	5	5	5	3	5	0	0	0	14	15	6	35	6	0	0	0	0	1	0	0	0	0	0	0	0	0	1	0	0	0	0	0	0	30
7	9	1	2	support_	BNWLA (D	2	Dhaka	1	3	1	5	0	0	0	0	0	5	0	0	5	5	0	0	5	10	5	20	7	0	1	3	0	0	3	0	3	0	1	0	3	0	3	1	3	3	3	0	3	17
8	16	2	2	support_	BNWLA (D	2	Dhaka	1	1	1	3	0	0	1	5	5	5	0	0	5	5	5	0	4	15	15	34	8	0	1	3	3	0	0	3	0	3	3	2	1	1	3	2	0	1	0	3	3	26
9	17	2	2	support_	BNWLA (D	2	Dhaka	1	10	1	5	5	3	5	1	5	3	5	3	5	1	1	3	18	18	9	45	9	2	0	3	0	0	3	0	0	0	3	0	3	1	1	0	1	2	1	3	3	37
10	13	2	2	support_	YPSA (Ch	2	Chittago	1	9	1	3	1	0	3	1	5	5	3	1	0	0	5	0	10	11	6	27	10	1	1	0	0	0	2	0	0	0	0	2	1	1	1	1	1	1	2	1	3	25
11	15	2	2	support_	YPSA (Ch	2	Chittago	1	4	2	3	1	0	3	1	5	5	3	1	0	0	5	0	10	11	6	27	11	1	1	1	1	2	2	1	2	1	1	2	2	1	1	1	1	2	1	1	2	28
12	12	1	2	support_	YPSA (Ch	2	Chittago	1	5	1	3	1	5	3	0	3	5	3	5	1	5	5	3	14	10	18	42	12	1	0	1	0	2	2	1	2	1	1	2	2	1	1	1	1	2	1	1	2	41
13	9	1	2	support_	YPSA (Ch	2	Chittago	1	1	1	1	1	3	3	1	3	1	3	1	3	0	3	3	8	8	10	26	13	2	1	1	0	2	0	0	1	0	0	0	2	0	1	3	1	0	3	0	0	26
14	14	2	2	support_	YPSA (Ch	2	Chittago	1	1	2	5	1	0	5	1	1	5	3	1	0	0	5	0	14	11	6	31	14	1	1	1	1	0	2	2	1	2	1	1	2	1	1	1	1	2	1	1	2	17
15	10	1	2	support_	YPSA (Ch	2	Chittago	1	3	2	1	1	0	1	0	3	0	1	1	0	0	0	3	4	4	3	11	15	1	1	0	1	3	3	0	3	3	1	2	2	1	0	0	3	0	1	0	3	17
16	13	2	2	support_	YPSA (Ch	2	Chittago	1	1	1	3	1	1	5	5	5	5	3	5	5	1	0	5	16	16	12	44	16	3	3	3	3	3	0	0	1	3	3	3	1	3	3	1	1	1	3	0	3	19
17	9	1	2	support_	YPSA (Ch	2	Chittago	1	1	1	1	1	1	1	1	1	1	1	5	1	0	5	0	8	4	3	15	17	1	1	1	0	2	1	3	1	1	1	1	2	0	1	3	3	2	2	0	0	15
18	13	2	2	support_	YPSA (Ch	2	Chittago	1	1	1	3	1	0	3	1	5	5	3	1	0	0	5	0	10	11	6	27	18	1	1	0	1	1	2	0	0	1	0	2	1	1	1	1	2	1	0	3	0	26
19	11	1	2	support_	YPSA (Ch	2	Chittago	1	5	1	3	1	0	3	1	5	5	3	1	0	5	0	0	10	11	6	27	19	1	1	0	0	1	2	0	0	0	0	2	1	0	1	0	2	1	0	3	0	0
20	10	1	2	support_	YPSA (Ch	2	Chittago	1	0	1	1	0	0	0	0	0	0	0	0	0	0	0	1	0	0	0	0	20	0	0		0	0	0	0	0	0	0											8
22	10	1	2	support_	OWDEB	2	Chittago	1	5	1	3	3	3	3	0	3	3	3	3	3	3	0	3	12	12	9	33	22	1	0	0	0	0	1	0	0	0	1	0	1	0	0	0	0	1	1	1	1	25
23	10	1	2	support_	OWDEB	2	Chittago	1	3	1	3	1	3	1	3	3	0	0	1	0	1	1	3	5	4	11	20	23	1	2	1	3	1	2	1	2	0	2	0	3	0	3	0	1	0	0	1	2	16
24	11	1	1	support_	OWDEB	2	Chittago	1	4	1	0	1	1	3	5	5	0	3	1	0	0	1	0	7	6	7	20	24	1	2	0	0	0	1	1	1	2	1	1	2	0	1	0	1	0	1	0	1	7
25	17	2	2	support_	OWDEB	2	Chittago	1	4	2	3	0	3	1	5	0	3	1	5	5	1	0	1	10	8	10	28	25	1	1	1	0	0	3	1	3	0	0	1	1	1	3	2	3	0	3	2	2	43
26	13	2	2	support_	OWDEB	2	Chittago	1	8	2	1	3	5	5	5	1	3	5	3	0	1	3	5	14	7	19	40	26	1	0	0	2	1	0	1	0	1	0	1	2	1	2	1	1	1	0	1	1	14
27	13	2	2	support_	OWDEB	2	Chittago	1	4	1	0	0	5	0	1	5	5	3	0	3	0	5	5	3	10	16	29	27	2	1	1	0	0	1	2	0	1	2	1	2	3	2	1	2	1	3	0	1	14
28	11	1	2	support_	OWDEB	2	Chittago	1	3	2	3	1	0	5	0	5	3	1	0	0	0	1	1	9	7	1	17	28	1	0	0	0	1	2	3	3	0	0	0	1	0	0	1	0	0	1	1	3	21
29	13	2	1	support_	OWDEB	2	Chittago	1	5	1	0	1	1	0	0	0	0	3	1	0	0	0	0	4	1	1	6	29	1	1	1	1	1	1	1	0	1	0	0	0	1	1	0	1	1	1	1	0	21
30	11	1	2	support_	OWDEB	2	Chittago	1	5	2	3	5	5	3	5	1	3	5	1	5	5	0	0	12	10	15	37	30	0	1	2	1	1	2	0	0	0	1	1	2	2	2	0	0	0	2	2	2	21
31	13	2	1	support_	OWDEB	2	Chittago	1	3	1	0	5	0	1	0	0	3	1	3	1	0	5	0	5	12	5	22	31	1	1	0	0	1	1	1	0	0	1	1	3	3	1	1	2	1	1	1	1	19
32	12	1	2	support_	OWDEB	2	Chittago	1	8	2	3	1	3	1	0	1	1	3	1	0	3	3	1	8	3	10	21	32	1	1	1	1	0	1	1	1	0	0	0	1	1	1	1	0	0	1	0	2	12
33	10	1	1	support_	OWDEB	2	Chittago	1	4	1	3	0	0	5	1	3	1	3	0	1	1	0	0	11	5	1	17	33	0	1	0	0	0	0	0	1	0	0	0	0	0	0	3	1	0	0	0	1	12
34	13	2	1	support_	OWDEB	2	Chittago	1	6	1	3	3	1	0	0	1	5	3	1	5	1	0	0	7	14	2	23	34	1	1	1	0	1	1	0	1	2	1	1	1	2	1	1	0	1	1	0	2	21
35	13	2	1	support_	OWDEB	2	Chittago	1	4	4	3	0	5	1	0	5	0	5	5	0	0	5	1	14	5	11	30	35	0	1	2	0	2	3	1	3	3	0	1	2	2	3	0	1	0	1	2	0	0
36	13	2	2	support_	OWDEB	2	Chittago	1	7	2	3	1	0	0	3	1	3	3	1	1	3	0	0	7	6	6	19	36	1	1	0	0	1	1	1	1	0	0	1	0	0	1	0	0	1	0	1	2	23
37	11	1	2	support_	OWDEB	2	Chittago	1	7	1	3	1	0	1	3	1	3	3	1	1	0	0	0	8	6	3	17	37	1	1	0	0	1	1	1	1	0	0	1	0	0	1	0	0	1	0	1	2	10
38	17	2	2	support_	OWDEB	2	Chittago	1	7	1	5	5	5	5	5	5	5	5	5	5	5	1	5	20	20	21	61	38	3	2	1	2	1	2	2	0	0	3	3	2	1	3	2	2	2	3	2	1	24
39	10	1	2	support_	OWDEB	2	Chittago	1	10	1	3	3	3	0	0	0	0	5	0	0	3	0	0	8	3	6	17	39	0	0	1	0	0	0	0	2	0	0	0	0	1	1	0	0	1	0	1	3	12
40	12	1	2	support_	OWDEB	2	Chittago	1	4	1	3	3	5	1	0	3	0	1	0	1	3	1	3	5	7	12	24	40	1	1	1	0	2	0	0	1	3	0	1	0	3	0	1	2	1	3	0	1	11
41	10	1	2	support_	OWDEB	2	Chittago	1	5	1	3	1	0	5	0	0	5	5	0	5	1	0	0	8	6	1	25	41	1	0	0	0	0	1	0	2	0	0	0	1	1	1	1	1	0	0	0	3	12
42	11	1	1	support_	OWDEB	2	Chittago	1	4	2	0	0	1	3	0	3	0	3	5	0	3	3	0	11	3	7	21	42	1	3	0	2	0	1	0	1	1	3	0	0	1	2	0	1	3	0	1	1	52
43	11	1	2	support_	OWDEB	2	Chittago	1	3	1	5	5	5	5	5	5	5	5	5	5	0	0	3	20	20	15	55	43	3	1	2	0	2	1	0	0	0	0	0	0	0	1	0	0	0	0	0	2	23
44	10	1	2	support_	OWDEB	2	Chittago	1	3	1	0	5	3	1	3	3	1	1	0	0	3	5	5	2	9	19	30	44	1	2	0	0	0	1	0	0	1	2	1	2	3	3	1	0	1	2	1	2	28
45	15	2	2	support_	OWDEB	2	Chittago	1	7	1	1	0	0	0	1	5	1	3	5	5	0	3	0	9	11	5	25	45	3	1	0	0	1	1	2	3	0	1	3	1	0	3	0	1	2	0	0	2	23
46	15	2	2	support_	OWDEB	2	Chittago	1	5	1	1	0	1	3	1	5	1	3	1	5	5	3	0	7	11	10	28	46	3	1	0	0	0	1	2	3	0	1	3	1	0	3	0	1	2	0	0	2	6
47	13	2	2	support_	OWDEB	2	Chittago	1	8	2	3	5	5	5	1	5	0	5	5	5	1	5	0	18	20	12	50	47	1	1	0	0	0	1	2	0	0	1	3	2	1	1	3	1	0	1	3	2	31
48	11	1	1	support_	OWDEB	2	Chittago	1	7	3	3	0	0	0	3	0	0	3	3	0	3	0	0	9	0	6	15	48	1	1	0	0	1	1	1	1	0	1	1	1	1	0	1	1	1	1	1	1	11
49	13	2	2	support_	OWDEB	2	Chittago	1	3	1	5	5	3	3	3	5	3	5	5	5	0	0	0	18	18	6	42	49	1	0	0	1	1	1	0	0	0	1	0	1	2	1	0	1	0	1	0	0	16
50	11	1	1	support_	OWDEB	2	Chittago	1	5	1	3	1	5	3	5	5	3	0	3	3	0	1	5	7	10	16	33	50	0	1	1	2	3	1	0	1	2	0	2	1	3	1	1	2	1	2	1	3	17
51	13	2	1	support_	OWDEB	2	Chittago	1	1	1	3	5	1	5	1	5	0	3	0	1	0	0	0	11	11	2	24	51	1	0	0	0	0	1	2	1	0	1	0	1	2	1	0	0	1	2	1	2	23
52	9	1	1	support_	OWDEB	2	Chittago	1	8	1	3	5	0	5	1	0	1	3	3	1	5	1	5	14	7	12	33	52	1	1	0	0	1	1	1	0	1	1	1	0	1	2	0	1	1	1	2	1	11
53	12	1	2	support_	OWDEB	2	Chittago	1	2	1	3	0	5	3	0	5	5	3	5	0	5	3	1	14	10	14	38	53	0	1	1	0	1	1	3	1	0	1	3	1	2	0	3	0	1	0	3	1	13
54	9	1	2	support_	OWDEB	2	Chittago	1	4	1	3	5	0	1	0	0	5	0	5	5	0	1	0	9	15	1	25	54	0	1	0	1	0	1	0	0	1	0	1	0	2	0	1	0	2	0	1	0	7
55	10	1	2	support_	OWDEB	2	Chittago	1	2	1	1	0	3	0	3	0	0	3	1	0	3	0	0	5	0	9	14	55	0	1	0	0	0	1	0	3	0	0	0	0	0	0	1	1	0	0	0	0	42
56	12	1	2	support_	OWDEB	2	Chittago	1	3	1	5	0	3	0	1	3	3	1	0	3	0	0	0	6	9	4	19	56	1	1	2	0	0	1	0	3	0	0	0	0	0	0	1	1	0	0	0	3	42
57	12	1	2	support_	OWDEB	2	Chittago	1	4	1	0	1	5	0	1	5	5	0	0	5	5	0	0	0	16	11	27	57	3	1	3	3	3	3	0	3	3	3	3	3	2	0	3	0	2	0	1	3	10
58	11	1	1	support_	OWDEB	2	Chittago	1	1	1	0	1	0	5	0	0	1	5	0	1	1	1	0	10	3	2	15	58	0	3	3	0	3	3	3	3	1	3	3	3	2	1	0	2	2	3	1	3	17
59	12	1	1	support_	OWDEB	2	Chittago	1	1	1	0	5	0	0	5	5	0	0	0	0	0	0	1	0	10	5	15	59	1	0	0	0	0	1	2	1	0	0	1	1	0	0	0	1	0	2	0	0	0
60	12	1	1	support_	OWDEB	2	Chittago	1	0	1	0	5	0	5	1	5	0	3	0	0	0	0	1	8	10	1	19	60	0	0		0	0	0	0	0	0	0											24
61	11	1	1	support_	OWDEB	2	Chittago	1	3	1	0	0	1	5	3	3	5	3	3	3	3	3	1	11	11	11	33	61	0	1	1	1	0	0	1	2	0	1	1	1	1	1	0	1	1	1	1	2	19
62	12	1	1	support_	OWDEB	2	Chittago	1	3	1	5	5	5	3	5	3	1	5	3	5	5	1	1	16	13	17	46	62	1	1	1	0	1	2	2	2	1	1	1	1	1	1	1	2	1	1	1	2	18
63	12	1	2	support_	OWDEB	2	Chittago	1	6	1	1	3	0	3	5	3	5	1	1	5	0	5	0	6	16	10	32	63	1	0	0	1	0	0	0	3	1	0	1	2	2	0	0	0	1	2	1	3	17
64	12	1	2	support_	OWDEB	2	Chittago	1	7	1	1	0	0	1	1	0	0	1	1	0	1	3	0	4	0	5	9	64	1	1	1	0	1	1	0	1	2	1	1	0	1	0	1	1	1	1	1	1	8
65	12	1	2	support_	OWDEB	2	Chittago	1	6	1	1	0	3	1	0	1	5	1	1	0	0	0	0	4	6	3	13	65	1	0	1	0	1	1	0	1	0	0	0	1	1	0	0	0	0	0	0	1	29
66	15	2	2	support_	OWDEB	2	Chittago	1	6	1	1	1	0	1	1	1	5	1	1	5	0	0	0	4	12	1	17	66	0	1	0	0	1	0	0	0	1	0	0	1	1	0	0	0	0	0	0	1	38
67	15	2	2	support_	OWDEB	2	Chittago	1	8	2	3	5	0	5	0	3	5	5	0	3	3	5	5	18	16	13	47	67	0	3	0	3	3	3	2	3	2	3	3	1	1	3	1	3	1	3	2	3	46
68	17	2	2	support_	OWDEB	2	Chittago	1	2	2	1	1	0	1	1	3	1	3	3	3	3	3	3	8	8	10	26	68	3	2	1	2	2	2	2	2	2	2	2	3	2	3	3	3	2	3	3	2	11
69	10	1	2	support_	OWDEB	2	Chittago	0	0	1	1	0	0	5	3	5	0	3	5	5	3	5	5	14	10	16	40	69	3	3	3	3	3	3	1	3	1	3	1	3	3	3	3	3	3	3	1	3	57
70	12	1	1	support_	OWDEB	2	Chittago	1	3	1	1	0	0	0	0	3	3	5	5	1	3	0	1	11	7	4	22	70	1	1	3	0	3	3	0	0	1	2	3	1	0	3	0	1	1	2	1	3	15
71	11	1	1	support_	OWDEB	2	Chittago	1	5	1	3	1	0	0	0	1	1	3	3	5	1	0	0	9	8	1	18	71	1	0	1	0	0	0	1	1	1	3	1	1	2	2	2	0	1	0	1	1	49
72	11	1	2	support_	OWDEB	2	Chittago	1	4	1	3	5	3	5	3	5	0	3	5	3	3	5	3	16	13	19	48	72	2	3	3	3	3	0	3	3	1	3	3	2	2	3	2	3	2	3	2	3	22
73	17	2	2	support_	OWDEB	2	Chittago	1	3	1	3	1	1	5	0	0	5	0	5	3	1	3	3	13	9	8	30	73	3	1	3	3	0	1	1	1	0	3	3	2	3	3	2	3	1	3	0	2	23
74	11	1	1	support_	OWDEB	2	Chittago	0	0	2	1	0	0	3	0	0	3	5	5	3	0	0	1	14	6	1	21	74	1	1	3	0	3	3	0	1	1	2	3	1	1	3	0	1	1	2	3	3	28
75	10	1	1	support_	OWDEB	2	Chittago	1	6	1	5	5	0	3	3	1	0	3	3	1	1	1	1	10	6	6	22	75	1	0	0	0	0	1	1	3	0	3	1	3	1	1	1	1	1	1	0	3	14
76	14	2	1	support_	OWDEB	2	Chittago	0	0	1	5	0	0	0	0	1	1	1	3	1	0	0	3	9	3	3	15	76	0	1	3	0	2	1	0	1	0	1	0	1	0	3	1	1	0	0	3	1	41
77	12	1	2	support_	OWDEB	2	Chittago	1	3	1	3	1	0	1	0	0	0	5	1	1	0	3	0	10	2	3	15	77	1	0	0	0	0	1	0	1	0	0	1	2	1	2	1	0	1	0	1	3	19
78	10	1	1	support_	OWDEB	2	Chittago	1	7	4	1	1	1	1	5	5	5	5	3	3	5	5	5	10	14	21	45	78	3	3	3	3	3	3	2	3	3	3	3	3	3	3	3	3	3	3	3	3	31
79	17	2	2	support_	OWDEB	2	Chittago	1	3	1	5	0	3	5	0	5	5	5	3	0	0	0	5	15	8	13	36	79	3	0	1	1	1	3	0	2	0	2	0	1	1	3	0	0	1	1	0	3	14
80	17	2	2	support_	OWDEB	2	Chittago	0	0	1	1	5	0	3	5	5	5	3	3	1	1	5	5	10	16	16	42	80	2	3	2	3	3	3	2	1	3	3	1	2	1	3	2	3	1	2	1	1	39
81	16	2	2	support_	OWDEB	2	Chittago	0	0	2	1	5	1	5	5	5	5	3	3	5	3	5	5	12	20	19	51	81	0	3	3	3	3	3	1	1	1	3	3	3	1	1	3	3	3	3	3	3	57
82	16	2	1	support_	OWDEB	2	Chittago	0	0	1	1	1	0	5	1	0	3	3	3	5	3	5	3	12	9	12	33	82	2	2	2	2	1	2	2	2	2	0	3	0	1	3	3	3	3	0	3	3	41
83	10	1	2	support_	BNWLA	2	Chittago	0	0	1	3	1	5	0	5	5	5	5	5	5	5	5	5	13	16	25	54	83	3	3	3	3	3	3	3	0	3	3	3	3	3	3	3	3	3	3	3	3	60
84	16	2	2	support_	BNWLA	2	Chittago	0	0	1	5	5	5	5	5	5	5	5	0	5	3	5	5	15	20	23	58	84	3	3	1	3	3	3	3	3	3	3	3	3	3	3	3	3	3	3	3	3	28
85	17	2	2	support_	BNWLA	2	Chittago	0	0	1	5	5	5	5	5	5	5	5	5	5	5	5	5	20	20	25	65	85	3	2	0	3	0	0	0	3	3	3	3	2	3	3	3	3	1	3	0	3	0
86	17	2	2	support_	BNWLA	2	Chittago	0	0	2	5	1	5	0	5	5	5	5	5	5	5	5	5	20	16	20	56	86	3	3	3	3	3	3	3	0	3	3	3	3	3	3	3	3	3	3	3	3	16
87	12	1	2	support_	BNWLA	2	Chittago	0	0	1	5	5	5	5	5	5	3	5	0	1	5	5	3	15	14	23	52	87	2	3	3	0	3	3	3	3	3	0	3	2	3	2	3	3	0	3	3	3	58
88	10	1	2	support_	BNWLA	2	Chittago	0	0	1	5	0	5	0	5	5	5	5	0	0	5	5	0	10	10	20	40	88	3	3	3	3	3	3	3	3	3	3	3	3	3	3	3	3	3	3	3	3	29
89	10	1	2	support_	BNWLA	2	Chittago	0	0	1	0	1	3	1	1	3	5	0	0	0	0	0	3	1	9	7	17	89	0	1	0	1	2	1	2	2	2	2	2	1	2	1	1	0	1	3	2	3	19
90	15	2	2	support_	BNWLA	2	Chittago	0	0	1	0	5	1	0	5	5	0	0	0	3	0	5	0	0	13	11	24	90	1	0	1	0	3	1	1	2	3	2	2	3	1	0	2	1	2	1	0	2	33
91	17	2	2	support_	BNWLA	2	Chittago	0	0	1	5	5	5	5	5	5	5	5	5	5	5	0	0	20	20	15	55	91	3	1	0	0	0	0	3	0	2	3	0	3	3	2	3	1	3	3	0	3	23
92	17	2	2	support_	BNWLA	2	Chittago	0	0	1	0	5	3	1	5	5	5	1	1	5	0	5	0	3	20	13	36	92	1	0	1	0	3	2	0	1	2	1	3	1	2	2	1	0	0	1	0	2	33
93	13	2	2	support_	BNWLA	2	Chittago	1	0	1	3	1	1	0	0	5	3	0	1	3	0	0	0	4	12	1	17	93	1	0	1	0	0	1	0	3	1	1	2	0	0	0	0	1	1	1	3	3	18
94	14	2	2	support_	BNWLA	2	Chittago	1	3	1	3	1	1	0	0	5	0	3	1	0	1	0	0	7	6	2	15	94	1	0	0	0	0	1	0	0	1	3	1	2	0	0	0	1	1	1	3	3	21
95	11	1	1	supports	OWDEB	2	Chittago	1	2	2	1	5	5	3	1	5	5	5	3	5	5	5	5	12	20	21	53	95	3	1	3	3	3	3	3	3	1	3	2	3	3	3	3	3	3	3	0	3	12
96	12	1	1	supports	OWDEB	2	Chittago	1	6	1	3	0	5	0	1	3	0	3	5	0	0	3	5	11	3	14	28	96	1	2	3	0	3	2	1	3	0	0	1	2	0	0	0	1	0	0	2	0	22
97	13	2	1	supports	OWDEB	2	Chittago	1	7	1	3	5	5	3	1	0	1	0	3	3	1	0	0	10	4	7	21	97	1	1	1	0	0	0	1	3	0	1	1	0	1	3	1	3	1	0	1	3	11
98	15	2	1	supports	OWDEB	2	Chittago	1	7	1	1	0	0	0	1	1	0	3	1	0	3	0	0	4	1	4	9	98	1	1	0	1	1	0	0	1	0	0	1	1	2	1	1	0	1	1	0	1	17
99	9	1	1	supports	OWDEB	2	Chittago	1	7	1	1	5	1	0	0	1	0	0	1	5	1	0	0	2	11	2	15	99	0	1	1	2	1	0	0	0	0	1	0	2	0	1	1	0	0	1	0	3	9
100	9	1	2	supports	OWDEB	2	Chittago	1	2	1	3	3	1	3	1	0	1	3	0	0	0	1	0	9	4	3	16	100	0	1	0	0	1	2	0	0	0	0	0	0	1	0	1	0	2	0	1	0	11
101	11	1	1	supports	OWDEB	2	Chittago	1	2	1	1	0	3	0	1	5	0	1	3	3	1	0	5	5	3	10	18	101	0	1	0	0	1	0	1	0	0	2	1	2	0	1	0	1	0	0	1	0	26
102	9	1	1	supports	OWDEB	2	Chittago	1	3	1	1	5	0	1	0	1	1	0	1	1	1	0	1	3	8	2	13	102	1	1	3	3	0	1	2	1	0	2	3	0	0	0	2	0	3	1	2	1	38
103	15	2	2	supports	OWDEB	2	Chittago	1	2	1	3	0	0	1	0	1	3	1	3	1	1	0	0	8	5	1	14	103	1	1	3	0	0	0	1	3	0	1	1	1	0	0	0	1	0	1	1	2	17
104	9	1	1	supports	OWDEB	2	Chittago	1	9	1	1	0	3	5	5	1	0	3	1	1	1	1	5	10	6	15	31	104	1	2	3	3	3	1	1	3	3	1	1	2	3	3	1	0	1	3	0	3	10
105	12	1	2	supports	OWDEB	2	Chittago	1	1	1	1	0	0	0	1	1	0	3	1	0	3	0	0	4	1	4	9	105	1	1	0	1	1	0	0	1	0	0	1	1	0	0	1	0	1	1	0	1	28
106	10	1	2	supports	OWDEB	2	Chittago	1	5	1	1	0	0	0	1	1	0	3	1	0	3	0	0	4	1	5	10	106	1	1	0	1	0	0	0	1	0	0	1	1	0	0	1	0	1	1	0	1	44
107	10	1	1	supports	OWDEB	2	Chittago	1	4	1	1	1	3	3	5	5	1	5	3	5	3	5	5	12	12	21	45	107	3	3	3	3	3	3	1	3	3	3	1	1	3	3	1	0	1	3	0	3	22
108	9	1	2	supports	OWDEB	2	Chittago	1	3	2	0	1	0	0	3	0	3	0	1	0	3	0	0	1	4	6	11	108	1	0	0	0	0	0	1	3	0	0	0	1	0	1	1	0	1	0	0	3	15
109	14	2	2	supports	OWDEB	2	Chittago	1	3	1	1	3	0	3	1	1	1	3	1	3	0	0	3	8	8	4	20	109	1	3	2	1	0	3	1	3	0	0	0	2	2	0	1	0	3	1	2	3	51
110	12	1	1	supports	OWDEB	2	Chittago	1	7	1	1	5	1	5	5	3	0	5	3	5	5	5	3	14	13	19	46	110	3	3	3	3	3	3	1	3	3	3	1	3	3	3	3	3	1	3	0	3	22
111	16	2	1	support_	OWDEB	2	Chittago	1	3	1	3	5	0	1	3	0	1	5	0	3	0	0	0	9	9	3	21	111	1	0	0	0	1	0	1	0	0	1	2	1	2	0	0	2	0	3	2	1	30
112	17	2	2	support_	OWDEB	2	Chittago	1	8	1	3	0	1	3	5	0	0	5	3	3	0	0	0	14	4	6	24	112	1	1	3	0	0	3	2	2	0	0	2	3	1	0	2	2	3	2	1	2	27
113	17	2	2	support_	OWDEB	2	Chittago	2	8	1	0	0	0	5	3	5	0	3	5	0	3	0	0	13	5	6	24	113	0	0	0	0	0	0	0	0	0	0	0	0	0	0	0	0	0	0	0	0	23
114	14	2	2	support_	OWDEB	2	Chittago	1	0	1	1	0	0	3	5	5	1	3	3	0	3	5	1	10	6	14	30	114	2	1	1	3	2	1	0	0	0	0	1	2	3	0	2	0	0	3	0	1	13
115	15	2	1	support_	OWDEB	2	Chittago	1	8	2	3	3	0	3	0	3	5	3	1	5	0	1	0	10	16	1	27	115	1	0	0	0	0	1	0	1	0	0	0	2	0	1	0	1	1	1	1	1	24
116	17	2	2	support_	OWDEB	2	Chittago	1	9	1	3	5	0	5	0	5	5	3	5	5	3	3	0	16	2	6	42	116	1	2	1	1	1	2	0	1	1	1	1	2	1	2	1	0	3	3	0	3	24
117	12	1	1	support_	OWDEB	2	Chittago	1	0	1	3	1	3	3	5	5	5	1	1	3	0	1	5	8	14	14	36	117	1	0	1	1	0	0	1	0	1	0	0	1	0	0	1	0	1	1	3	1	18
118	10	1	2	support_	OWDEB	2	Chittago	1	3	1	1	5	0	0	5	0	5	5	1	1	0	0	0	7	11	5	23	118	2	2	1	0	1	1	0	2	0	3	0	1	0	1	0	3	1	1	0	3	14
119	12	1	1	support_	OWDEB	2	Chittago	1	3	1	0	1	0	3	0	0	1	0	0	1	0	3	0	3	3	3	9	119	1	0	2	0	0	2	1	1	0	0	1	2	0	1	0	0	1	1	2	3	25
120	15	2	2	support_	OWDEB	2	Chittago	3	6	1	3	0	0	1	1	1	3	1	3	1	3	0	0	8	5	4	17	120	0	0	0	0	1	2	0	3	0	1	1	1	0	0	0	0	0	0	0	1	17
121	17	2	2	support_	OWDEB	2	Chittago	3	8	1	3	0	0	3	3	0	3	3	3	0	5	0	0	12	3	8	23	121	0	0	0	0	1	2	0	0	0	1	1	1	1	1	3	1	1	0	3	1	22
122	9	1	1	support_	OWDEB	2	Chittago	1	5	1	1	5	1	1	3	1	5	1	1	0	3	0	0	4	11	7	22	122	1	0	1	0	1	0	0	1	0	1	1	1	0	0	1	0	1	3	1	1	14
123	14	2	1	support_	OWDEB	2	Chittago	2	4	1	3	0	0	3	3	3	1	0	1	0	1	3	0	7	4	7	18	123	0	1	0	1	0	1	0	3	1	3	1	1	0	1	0	0	1	1	0	3	13
124	10	1	1	support_	OWDEB	2	Chittago	1	0	1	0	1	5	0	3	3	5	0	3	5	1	0	0	4	13	9	26	124	1	0	0	2	0	0	1	3	0	1	0	1	0	0	1	2	0	0	0	2	19
125	11	1	1	support_	OWDEB	2	Chittago	1	4	1	0	5	3	3	3	0	0	5	3	1	0	5	0	11	6	11	28	125	0	1	1	0	1	2	1	1	0	0	2	2	1	1	1	0	0	0	2	3	26
126	14	2	1	support_	OWDEB	2	Chittago	1	5	1	3	1	3	1	5	3	5	3	1	0	0	1	1	8	9	9	26	126	1	2	0	1	0	1	0	3	0	0	2	1	2	2	2	2	1	2	0	3	23
127	17	2	2	support_	OWDEB	2	Chittago	2	2	1	3	5	0	3	1	5	5	3	0	3	0	3	0	9	18	4	31	127	0	2	2	1	0	2	2	1	1	1	2	0	0	1	1	0	1	0	3	3	25
128	16	2	2	supports	YPSA(Gul	2	Shitakun	1	0	1	3	1	3	3	1	0	1	3	1	3	5	5	3	10	5	17	32	128	1	1	0	1	1	2	0	1	0	1	1	2	1	2	2	0	1	2	2	3	20
129	13	2	2	supports	YPSA(Gul	2	Shitakun	1	11	1	3	1	3	3	1	0	1	3	1	3	5	5	3	10	5	17	32	129	1	1	0	1	1	2	0	3	1	0	1	1	1	2	1	1	2	0	1	3	16
130	11	1	2	supports	YPSA(Gul	2	Shitakun	1	8	1	0	5	0	1	3	0	5	3	3	1	5	1	0	7	11	9	27	130	2	1	1	0	0	3	0	2	1	2	3	2	0	2	0	2	2	0	1	2	20
131	13	2	2	supports	YPSA(Gul	2	Shitakun	1	5	1	0	0	3	1	1	1	0	1	1	1	1	1	0	3	2	6	11	131	1	2	0	1	0	0	0	0	1	1	0	1	1	2	0	1	1	2	2	0	22
132	16	2	2	supports	YPSA(Gul	2	Shitakun	1	8	1	1	0	3	1	0	0	1	1	3	1	1	0	3	6	2	7	15	132	1	0	1	0	1	2	0	3	1	0	1	1	1	2	1	1	1	0	0	3	19
133	17	2	2	supports	YPSA(Gul	2	Shitakun	1	10	1	1	0	3	1	0	0	1	1	1	1	0	0	3	4	2	6	12	133	1	0	1	0	0	1	0	3	2	1	2	1	1	0	1	1	0	0	1	3	15
134	11	1	2	supports	YPSA(Gul	2	Shitakun	1	12	1	3	1	3	0	1	0	1	1	1	3	0	0	3	5	5	7	17	134	1	0	1	0	0	1	0	3	1	0	1	0	2	0	2	1	3	0	1	3	24
135	14	2	2	supports	YPSA(Gul	2	Shitakun	1	8	1	3	1	3	1	1	0	1	3	1	3	5	3	5	8	5	17	30	135	1	1	0	1	1	2	0	1	0	1	1	2	1	2	2	0	1	2	0	3	23
136	15	2	2	supports	YPSA(Gul	2	Shitakun	1	4	1	0	0	1	3	1	1	1	3	1	1	3	3	0	7	3	8	18	136	1	1	1	0	0	0	0	1	0	1	1	1	1	1	2	0	1	1	1	1	20
137	10	1	2	supports	YPSA(Gul	2	Shitakun	1	9	1	0	1	5	0	5	1	1	0	3	1	1	0	5	3	4	16	23	137	0	1	1	2	0	3	0	1	2	1	1	0	1	1	2	1	3	1	0	3	4
138	12	1	1	supports	YPSA(Gul	2	Shitakun	1	5	1	3	5	0	3	5	1	5	5	3	5	0	5	3	14	16	3	43	138	0	1	0	1	0	2	0	3	2	0	1	2	1	2	0	0	1	3	2	2	13
139	13	2	2	supports	YPSA(Gul	2	Shitakun	1	4	1	1	5	3	3	0	0	1	3	1	0	0	0	0	8	6	3	17	139	1	1	0	0	0	1	3	0	0	0	1	0	0	1	0	0	1	1	2	1	15
140	11	1	1	supports	YPSA(Gul	2	Shitakun	1	8	1	0	1	0	0	1	0	0	0	0	0	3	0	0	0	1	4	5	140	0	1	3	0	0	0	0	0	0	0	0	0	0	0	0	0	0	0	0	0	8
141	11	1	1	supports	YPSA(Gul	2	Shitakun	1	5	1	0	5	0	0	0	0	3	1	0	5	3	1	0	1	13	4	18	141	0	1	0	1	0	0	0	3	0	0	0	0	0	0	0	0	1	0	1	1	19
142	9	1	2	supports	YPSA(Gul	2	Shitakun	1	5	1	1	0	3	1	0	0	1	3	1	1	0	0	3	6	2	6	14	142	1	0	1	0	0	1	0	3	2	1	2	1	1	0	1	1	0	0	1	3	12
143	10	1	1	supports	YPSA(Gul	2	Shitakun	1	2	1	1	0	0	3	3	3	3	3	0	0	1	1	0	7	6	5	18	143	1	1	1	0	0	0	0	1	1	0	0	1	2	0	0	0	1	1	1	1	20
144	12	1	1	supports	YPSA(Gul	2	Shitakun	1	4	1	3	0	0	0	0	0	0	0	0	0	0	1	1	3	0	2	5	144	1	1	0	0	0	0	1	1	0	1	0	0	3	0	0	1	1	1	1	3	12
145	11	1	2	supports	YPSA(Gul	2	Shitakun	1	5	1	1	1	0	1	0	0	1	0	0	1	0	0	0	2	3	0	5	145	1	2	1	0	0	1	0	3	0	1	1	1	0	1	1	0	1	1	2	3	19
146	10	1	1	supports	YPSA(Gul	2	Shitakun	1	5	1	1	0	3	1	0	0	1	3	1	1	0	0	3	6	2	6	14	146	1	0	1	0	0	1	0	3	2	1	2	1	1	0	1	1	0	0	1	3	11
147	11	1	1	supports	YPSA(Gul	2	Shitakun	1	5	1	3	0	0	5	1	3	3	0	3	1	0	0	0	11	7	1	19	147	1	1	0	1	0	1	1	1	0	1	0	1	0	0	0	0	0	1	1	1	16
148	11	1	2	supports	YPSA(Gul	2	Shitakun	1	5	1	1	0	3	5	1	0	0	3	5	0	3	5	1	14	0	13	27	148	1	0	0	0	1	1	0	3	1	0	0	1	0	2	1	1	0	0	1	3	31
149	13	2	2	supports	YPSA(Gul	2	Shitakun	1	4	1	5	0	0	0	0	0	0	3	0	0	0	0	1	8	0	1	9	149	1	1	0	1	0	1	2	0	1	0	1	0	0	1	0	1	0	1	0	1	23
150	16	2	2	supports	YPSA(Gul	2	Shitakun	1	3	1	3	1	3	3	0	1	1	3	3	1	1	5	1	12	4	10	26	150	1	2	0	1	0	2	0	0	1	2	2	1	2	3	0	0	1	1	0	1	15
151	14	2	1	supports	YPSA(Gul	2	Shitakun	1	11	1	0	5	3	1	1	0	0	3	1	5	3	0	0	5	10	7	22	151	1	1	0	0	0	3	1	1	0	2	0	1	1	3	1	2	0	2	3	1	27
152	15	2	2	supports	YPSA(Gul	2	Shitakun	1	7	1	3	0	0	0	0	0	0	0	0	0	3	0	3	3	0	6	9	152	1	0	2	0	1	0	3	1	0	1	0	1	1	1	1	1	0	1	0	0	16
153	12	1	1	supports	YPSA(Gul	2	Shitakun	1	5	1	1	1	1	0	0	0	5	0	1	3	5	5	0	2	9	11	22	153	1	2	3	2	2	0	0	0	1	3	2	3	0	2	0	2	2	2	0	0	17
158	11	1	2	supports	YPSA(Gul	1	Shitakun	1	5	1	0	1	0	3	3	1	5	5	3	0	0	3	0	11	7	6	36	158	1	0	1	0	0	1	0	3	0	1	2	2	1	0	0	1	2	0	1	3	21
159	12	1	2	supports	YPSA(Gul	1	Shitakun	1	5	1	1	3	5	3	5	5	5	3	1	1	0	3	5	8	14	18	40	159	0	2	3	0	1	0	3	2	0	3	0	0	1	2	2	0	3	2	3	0	9
160	15	2	2	supports	YPSA(Gul	1	Shitakun	1	3	1	0	0	0	1	5	0	1	1	3	0	0	5	0	5	1	10	16	160	1	0	0	0	0	0	1	1	0	1	0	1	0	0	0	0	1	1	1	1	14
161	11	1	2	supports	YPSA(Gul	1	Shitakun	1	7	1	1	3	5	5	0	5	5	0	0	0	3	3	5	6	13	16	35	161	0	2	1	3	1	1	0	0	3	0	2	1	3	0	0	0	1	0	1	2	0
162	14	2	2	supports	YPSA(Gul	1	Shitakun	1	2	1	0	0	0	1	5	0	1	1	5	1	1	3	0	7	2	9	18	162	1	0	1	0	0	0	1	1	0	1	0	1	0	0	0	0	1	1	1	0	9
163	13	2	2	supports	YPSA(Gul	1	Shitakun	1	7	1	0	0	0	3	5	0	1	1	5	1	1	3	1	7	2	9	18	163	1	0	1	0	0	0	1	1	0	1	0	1	0	0	0	0	1	1	1	0	9
164	10	1	2	supports	YPSA(Gul	1	Shitakun	1	0	1	5	1	0	3	1	3	3	3	3	3	0	0	1	14	10	1	25	164	0	0		0	0	0	0	0	0	0											25
165	11	1	2	supports	YPSA(Gul	1	Shitakun	1	3	1	1	3	5	3	5	5	5	3	0	1	1	3	5	7	14	19	40	165	0	1	0	2	3	0	2	0	1	0	1	3	2	1	0	3	0	3	2	1	21
166	10	1	1	supports	YPSA(Gul	1	Shitakun	1	4	1	1	3	5	3	5	5	5	3	1	1	0	1	5	7	14	16	37	166	0	2	0	0	1	0	3	0	3	3	0	0	2	0	0	3	0	1	0	3	8
167	11	1	1	supports	YPSA(Gul	1	Shitakun	1	2	1	0	0	1	5	0	0	1	1	5	3	3	0	1	11	4	5	20	167	1	0	1	0	0	0	1	1	0	1	0	0	0	0	0	0	1	1	1	0	10
168	13	2	2	supports	YPSA(Gul	1	Shitakun	1	3	1	0	0	0	1	5	0	1	1	5	1	1	3	0	7	2	9	18	168	1	0	1	0	0	0	1	1	0	1	0	1	0	0	0	0	1	1	1	0	15
169	15	2	2	supports	YPSA(Gul	1	Shitakun	1	3	1	0	3	1	3	1	0	3	1	3	3	0	0	3	7	9	5	21	169	1	1	2	0	1	0	0	1	1	1	0	1	1	2	1	0	0	0	1	0	15
170	11	1	2	supports	YPSA(Gul	1	Shitakun	2	9	1	0	3	1	3	1	0	1	0	1	3	0	1	0	4	7	3	14	170	1	0	0	0	2	1	0	1	1	1	2	0	0	2	1	0	0	0	1	0	33
171	10	1	2	supports	YPSA(Gul	1	Shitakun	1	5	1	0	3	1	3	1	0	3	1	3	3	0	0	0	7	9	2	18	171	1	0	0	0	0	1	0	1	1	1	0	0	1	2	1	0	0	0	1	0	13
172	10	1	1	supports	YPSA(Gul	1	Shitakun	1	5	1	0	3	1	3	1	0	1	0	1	0	0	0	1	4	4	2	10	172	1	0	0	0	2	1	0	1	1	1	2	0	0	2	1	0	0	0	1	0	28
173	9	1	2	supports	YPSA(Gul	1	Shitakun	1	2	1	3	5	1	3	0	5	5	5	0	0	5	3	0	11	15	9	35	173	0	1	1	2	0	0	1	3	1	1	2	1	2	2	1	0	2	3	2	3	0
174	10	1	2	supports	YPSA(Gul	1	Shitakun	1	0	1	0	5	5	3	1	1	5	3	3	3	0	0	1	9	14	6	29	174	0	0		0	0	0	0	0	0	0											0
175	11	1	2	supports	YPSA(Gul	1	Shitakun	1	0	1	5	5	5	3	1	5	3	0	1	0	0	0	1	9	13	6	28	175	0	0		0	0	0	0	0	0	0											30
176	14	2	2	supports	YPSA(Gul	1	Shitakun	1	3	1	0	1	5	3	5	5	5	0	3	5	1	0	3	6	16	14	36	176	3	1	0	0	0	1	1	0	0	2	2	0	0	0	0	0	1	1	0	3	19
177	15	2	2	supports	YPSA(Gul	1	Shitakun	1	5	1	0	1	5	3	5	5	5	0	3	5	1	1	3	6	16	15	37	177	3	1	0	0	0	1	1	0	0	2	1	2	0	0	0	0	1	1	0	2	14
178	9	1	2	supports	YPSA(Gul	1	Shitakun	1	7	1	0	0	0	0	5	0	1	0	3	5	0	3	1	3	6	9	18	178	1	3	0	1	2	2	1	3	3	2	0	2	0	0	1	3	2	2	1	1	30
179	16	2	2	support_	BTS, Bau	2	Dhaka	1	2	1	3	1	3	0	5	5	1	5	3	5	3	0	5	11	12	16	39	179	1	2	1	0	0	1	0	0	1	0	2	1	2	1	0	0	0	1	1	2	17
180	16	2	2	support_	BTS, Bau	2	Dhaka	1	11	1	0	1	5	3	3	3	1	5	0	3	5	0	0	8	8	13	29	180	1	2	0	0	0	1	0	0	1	1	1	2	1	1	0	0	1	1	1	3	0
181	14	2	2	support_	BTS, Bau	2	Dhaka	1	11	1	3	5	0	3	1	0	3	3	0	0	0	0	3	9	8	4	21	181	1	1	0	0	0	1	1	0	1	1	2	3	1	0	0	0	1	1	1	2	14
182	11	1	2	support_	BTS, Bau	2	Dhaka	1	10	1	0	3	5	0	3	0	5	0	3	3	3	3	5	3	11	19	39	182	1	1	1	3	1	1	3	3	1	2	3	0	1	1	1	1	2	1	3	1	24
183	12	1	2	support_	BTS, Bau	2	Dhaka	1	5	1	0	0	0	0	0	0	0	5	1	0	0	0	0	6	0	0	6	183	0	0	0	0	0	1	0	1	0	0	1	1	2	1	1	2	0	0	1	3	15
184	15	2	2	support_	BTS, Bau	2	Dhaka	1	0	1	3	5	5	1	3	0	3	3	1	5	3	0	1	8	13	12	33	184	0	0		0	0	0	0	0	0	0											11
185	15	2	2	support_	BTS, Bau	2	Dhaka	1	7	1	3	1	1	0	3	1	5	1	0	5	1	0	0	4	12	5	21	185	1	0	0	1	0	1	0	1	0	1	0	1	0	1	0	0	0	0	1	3	23
186	15	2	2	support_	BTS, Bau	2	Dhaka	1	10	1	3	0	5	1	5	1	3	3	3	3	5	5	5	10	7	25	42	186	3	0	3	1	3	3	1	2	0	0	0	1	0	3	0	0	0	1	2	0	12
187	14	2	2	support_	BTS, Bau	2	Dhaka	1	9	1	0	0	3	0	0	1	1	1	1	0	0	0	0	2	2	3	7	187	3	1	1	0	0	1	0	0	0	1	1	1	0	1	0	0	1	0	1	3	17
188	13	2	2	support_	BTS, Bau	2	Dhaka	1	8	1	0	0	0	0	0	0	0	3	1	0	0	0	0	4	0	0	4	188	0	1	0	0	1	1	1	1	1	1	1	1	2	3	0	0	1	0	1	1	8
189	16	2	1	support_	BTS, Bau	2	Dhaka	1	7	1	3	0	1	5	0	1	0	5	3	0	3	3	0	16	1	7	24	189	1	1	1	0	0	2	2	0	0	1	1	0	0	0	0	0	0	1	2	0	24
190	12	1	2	support_	BTS, Bau	2	Dhaka	1	10	1	3	3	1	0	0	0	1	3	1	0	0	0	0	7	4	1	12	190	1	0	0	1	1	0	0	3	0	1	0	0	0	0	0	0	0	1	0	0	18
191	17	2	1	support_	BTS, Bau	2	Dhaka	1	6	1	1	3	1	3	3	5	0	3	3	0	3	5	1	10	8	13	31	191	0	1	1	0	2	0	0	1	2	1	2	3	1	2	0	2	3	1	2	0	9
192	12	1	1	support_	BTS, Bau	2	Dhaka	1	12	1	3	5	1	3	0	5	5	3	1	5	1	3	0	10	20	5	35	192	1	0	1	2	1	1	0	2	0	1	0	1	0	1	0	0	1	1	2	3	36
193	17	2	1	support_	BTS, Bau	2	Dhaka	1	9	1	3	5	5	0	0	0	3	3	1	0	1	0	3	7	8	9	24	193	1	0	1	0	0	0	0	1	0	1	1	1	0	0	0	0	0	1	1	1	16
194	15	2	1	support_	BTS, Bau	2	Dhaka	1	12	1	3	0	0	5	0	1	1	3	5	3	0	5	0	16	5	5	26	194	1	1	0	0	0	1	1	0	1	2	1	2	1	0	1	0	1	1	1	1	24
195	11	1	1	support_	BTS, Bau	2	Dhaka	1	9	1	3	5	0	3	5	5	0	3	3	3	0	0	3	12	13	8	33	195	1	1	1	1	1	1	0	3	1	0	1	1	2	1	1	1	1	2	1	3	16
196	13	2	1	school	Nimtoli	1	Dhaka	1	3	1	3	0	0	5	0	0	5	3	1	0	3	0	0	12	5	3	20	196	1	0	0	0	0	0	1	3	0	2	3	2	0	0	3	1	0	0	0	3	8
197	12	1	1	school	Nimtoli	1	Dhaka	1	5	1	3	1	1	0	1	0	3	3	0	1	0	3	0	6	5	5	16	197	1	1	0	0	0	0	0	1	0	1	0	0	1	0	0	1	0	1	0	1	1
198	14	2	1	school	Nimtoli	1	Dhaka	1	5	1	1	5	0	0	0	0	5	0	0	0	0	0	3	1	10	3	14	198	0	0	0	0	0	0	0	0	0	0	0	0	0	0	0	0	0	0	1	0	43
199	14	2	1	school	Nimtoli	1	Dhaka	1	5	1	5	3	5	3	1	5	5	5	3	5	3	5	3	16	18	17	51	199	1	3	2	2	2	2	2	2	2	2	2	3	1	2	2	3	3	2	2	3	30
200	14	2	1	school	Nimtoli	1	Dhaka	1	5	1	1	0	3	1	0	5	0	3	1	1	5	1	0	6	6	9	21	200	0	2	3	1	0	1	2	3	1	2	0	1	3	0	2	3	0	1	2	3	25
201	13	2	1	school	Nimtoli	1	Dhaka	1	5	1	5	1	0	0	5	0	5	3	0	5	1	0	0	8	11	6	25	201	1	2	3	0	0	1	0	1	2	0	2	1	1	0	2	0	2	1	3	3	29
202	11	1	1	school	Nimtoli	1	Dhaka	1	5	1	3	5	3	5	3	3	5	5	5	0	3	5	5	18	13	19	50	202	1	0	2	0	0	0	3	3	0	2	3	2	2	3	0	2	0	3	1	3	12
203	14	2	1	school	Nimtoli	1	Dhaka	1	5	1	3	1	0	3	0	3	1	1	3	0	3	3	5	6	3	17	26	203	1	2	3	0	0	1	1	3	0	2	3	1	1	1	1	2	1	1	2	3	14
204	11	1	1	school	Nimtoli	1	Dhaka	1	5	1	3	1	0	1	0	5	1	5	0	1	3	0	0	9	8	3	20	204	0	1	0	0	1	0	1	1	0	1	1	1	2	0	0	0	2	1	0	0	5
205	12	1	1	school	Nimtoli	1	Dhaka	1	5	1	3	0	0	0	1	0	0	0	0	0	0	0	0	3	0	1	4	205	3	0	3	0	0	0	0	2	0	0	1	0	0	1	0	0	1	0	0	3	11
206	10	1	2	school	Nimtoli	1	Dhaka	1	5	1	1	0	0	3	5	1	0	1	0	5	0	0	0	5	6	5	16	206	1	0	0	0	0	2	0	0	0	0	0	1	0	0	0	0	0	0	0	1	11
207	9	1	2	school	Nimtoli	1	Dhaka	1	5	1	3	0	1	1	3	1	3	3	3	0	0	1	3	10	4	8	22	207	1	0	1	0	0	1	0	1	1	1	1	0	0	0	1	0	0	1	1	1	19
208	10	1	2	school	Nimtoli	1	Dhaka	1	5	1	3	0	3	3	5	3	0	5	3	3	3	3	3	14	6	17	37	208	1	0	3	0	0	0	1	3	1	2	0	2	0	1	0	0	1	0	1	3	13
209	9	1	2	school	Nimtoli	1	Dhaka	1	5	1	3	0	5	1	0	1	0	1	3	3	0	3	3	8	4	11	23	209	1	0	0	0	0	1	0	0	1	2	0	1	1	1	2	0	0	1	0	2	11
211	12	1	2	school	Nimtoli	1	Dhaka	1	5	1	1	0	3	0	0	0	3	0	1	1	0	3	1	2	4	7	13	211	1	0	1	1	0	1	0	2	1	0	0	0	1	1	0	0	0	1	0	1	18
212	12	1	2	school	Nimtoli	1	Dhaka	1	5	1	0	1	3	0	1	0	3	0	1	5	0	0	5	1	9	9	19	212	1	2	3	1	0	1	0	3	0	1	0	0	1	0	0	1	1	0	0	3	24
213	11	1	2	school	Nimtoli	1	Dhaka	1	5	1	0	1	0	0	1	1	3	1	3	0	0	0	0	4	5	1	10	213	1	2	1	0	0	0	1	1	0	1	0	0	1	0	0	1	0	1	1	0	13
214	12	1	2	school	Nimtoli	1	Dhaka	1	5	1	5	1	1	3	3	3	1	3	3	0	1	0	3	14	5	8	27	214	1	0	1	1	0	1	1	0	1	2	3	1	2	2	0	1	1	2	1	3	31
215	11	1	2	school	Nimtoli	1	Dhaka	1	5	1	3	0	3	1	1	3	5	3	0	1	1	0	0	7	9	5	21	215	0	1	0	0	0	1	0	1	0	1	1	2	0	1	1	1	1	2	0	0	7
216	11	1	2	school	Nimtoli	1	Dhaka	1	5	1	3	0	5	3	3	0	0	5	3	1	1	3	3	14	1	15	30	216	1	0	0	1	0	0	0	1	0	1	0	0	0	1	0	0	0	1	0	1	19
217	13	2	2	school	Nimtoli	1	Dhaka	1	5	1	3	1	3	3	3	3	0	3	1	5	5	3	3	10	9	17	36	217	1	2	1	1	1	2	2	1	1	2	1	1	2	1	3	2	2	2	1	2	14
218	12	1	2	school	Nimtoli	1	Dhaka	1	5	1	3	5	3	1	0	0	3	3	3	5	1	3	3	10	13	10	33	218	1	1	1	0	0	0	0	2	0	0	0	0	1	0	1	1	1	1	2	2	15
219	11	1	2	school	Nimtoli	1	Dhaka	1	5	1	0	3	1	1	0	5	5	0	0	3	0	0	5	4	16	6	26	219	1	0	0	0	3	0	1	3	0	1	1	1	1	0	1	1	0	1	1	3	1
220	11	1	2	school	Nimtoli	1	Dhaka	1	5	1	3	0	0	1	0	0	3	0	0	1	1	0	0	4	5	0	9	220	0	0	0	0	0	0	0	0	0	0	0	0	0	1	0	0	0	0	0	0	5
221	14	2	2	school	Nimtoli	1	Dhaka	1	5	1	3	3	3	3	3	1	3	3	3	3	3	1	0	12	10	10	32	221	1	1	1	0	0	0	0	1	0	1	1	1	1	1	1	1	1	1	1	1	11
222	12	1	2	school	Nimtoli	1	Dhaka	1	5	1	3	0	1	0	0	1	1	0	1	1	1	3	0	4	3	5	12	222	1	0	1	0	2	1	0	2	0	0	0	1	0	1	0	0	0	1	0	1	21
223	10	1	2	support_	BNWLA (G	2	Gazipur	1	5	1	5	0	0	1	1	5	0	0	3	0	5	0	0	9	5	6	20	223	1	1	3	0	0	0	0	0	0	3	0	3	0	0	0	0	0	1	1	3	30
224	11	1	2	support_	BNWLA (G	2	Gazipur	1	1	1	5	0	3	5	3	5	5	3	3	3	1	0	0	16	13	7	36	224	0	1	2	3	2	3	3	0	3	3	1	3	0	0	2	0	2	1	0	1	13
225	14	2	2	support_	BNWLA (G	2	Gazipur	1	0	1	3	0	3	3	1	5	5	3	5	5	0	3	0	14	15	7	36	225	1	1	3	1	1	3	3	3	0	3	2	3	0	0	3	3	1	2	1	2	20
226	11	1	2	support_	BNWLA (G	2	Gazipur	2	0	1	5	0	3	5	5	5	5	5	5	0	0	1	5	20	10	14	44	226	3	2	2	3	2	1	3	2	1	1	1	1	1	2	1	1	1	3	3	3	32
227	15	2	2	support_	BNWLA (G	2	Gazipur	4	0	2	1	3	0	5	5	1	0	3	1	1	0	0	3	10	5	8	23	227	2	1	2	2	0	0	0	1	0	2	1	1	1	3	1	1	0	1	0	0	47
228	16	2	2	support_	BNWLA (G	2	Gazipur	4	0	1	3	5	5	5	0	5	5	5	0	1	1	5	1	13	16	11	40	228	1	1	3	1	0	3	0	0	0	1	3	3	1	1	1	0	0	3	0	3	21
229	15	2	2	support_	BNWLA (G	2	Gazipur	4	0	1	5	0	3	0	5	5	0	5	0	5	0	3	5	10	10	16	36	229	1	0	2	2	0	3	0	2	0	0	0	1	3	0	0	1	1	3	1	1	15
231	15	2	2	support_	BNWLA (G	2	Gazipur	4	0	1	3	0	1	0	1	1	3	1	3	3	0	3	3	7	7	5	19	231	3	2	1	0	0	0	1	1	3	1	0	0	0	0	1	0	1	1	0	0	14
232	9	1	2	support_	BNWLA (G	2	Gazipur	3	0	1	1	5	5	1	5	1	0	3	3	5	0	3	0	8	10	13	31	232	1	0	0	0	0	0	0	3	1	1	1	0	0	2	1	1	2	1	1	1	15
233	16	2	2	support_	BNWLA (G	2	Gazipur	3	3	1	1	5	3	1	3	0	0	3	1	5	1	3	1	6	10	11	27	233	1	0	1	0	1	2	0	0	0	2	1	2	2	3	1	0	1	2	1	2	25
234	15	2	2	support_	BNWLA (G	2	Gazipur	1	3	1	3	5	5	1	0	0	0	3	0	5	5	0	0	7	10	10	27	234	1	0	2	3	3	1	0	0	1	1	0	1	2	3	0	1	2	0	0	3	17
235	15	2	2	support_	Shishu p	2	Gazipur	1	1	1	5	0	3	3	3	5	5	5	5	5	5	5	3	18	15	19	52	235	1	0	1	0	1	0	0	0	1	1	0	2	2	2	1	0	0	2	1	2	30
236	15	2	2	support_	Shishu p	2	Gazipur	1	8	1	5	5	1	5	0	3	5	3	5	0	5	5	3	18	13	14	45	236	2	1	1	1	2	2	2	3	0	0	1	2	2	3	1	0	1	2	1	3	18
237	10	1	1	support_	Shishu p	2	Gazipur	1	7	1	3	5	3	3	0	5	1	1	3	3	0	1	0	10	14	4	28	237	1	1	0	0	1	0	1	1	1	1	1	0	1	1	0	1	1	0	1	0	13
238	12	1	2	support_	Shishu p	2	Gazipur	1	5	1	3	3	5	0	0	1	1	5	3	0	0	0	1	11	5	6	22	238	2	0	2	0	2	0	2	2	1	2	0	2	0	1	0	0	0	2	1	1	11
239	10	1	2	support_	Shishu p	2	Gazipur	1	4	1	0	0	1	0	1	0	1	3	1	0	1	0	3	4	1	6	11	239	1	1	1	0	0	1	1	0	1	0	1	1	0	0	1	1	0	1	1	1	19
240	11	1	2	support_	Shishu p	2	Gazipur	1	4	1	0	0	1	3	5	1	3	5	0	1	3	5	0	8	5	14	27	240	0	1	2	0	1	0	0	0	1	2	0	0	2	3	2	1	2	0	1	1	13
241	9	1	2	support_	Shishu p	2	Gazipur	1	3	1	3	0	3	0	3	3	1	1	1	3	3	3	1	5	7	13	25	241	1	0	1	0	0	1	0	1	0	1	1	1	0	1	1	0	1	1	0	2	8
242	11	1	2	support_	Shishu p	2	Gazipur	1	3	3	0	0	0	1	1	3	0	0	1	1	0	3	1	2	4	5	11	242	0	1	0	0	0	1	0	1	0	0	0	1	0	1	1	1	2	1	0	1	17
243	13	2	2	support_	Shishu p	2	Gazipur	1	4	1	0	0	0	1	1	1	0	3	3	0	0	0	0	7	1	1	9	243	0	0	0	1	0	1	0	1	0	1	0	0	0	1	0	1	1	1	1	2	26
244	9	1	2	support_	Shishu p	2	Gazipur	1	5	1	0	0	0	0	1	0	0	0	0	1	5	1	0	0	1	9	10	244	0	0	1	2	0	0	0	0	0	0	0	0	1	0	0	0	0	0	1	3	9
245	9	1	2	support_	Shishu p	2	Gazipur	1	4	1	0	1	3	1	5	0	3	3	3	3	3	3	0	7	7	14	28	245	0	1	0	0	0	1	0	0	0	1	1	1	0	1	0	1	0	1	1	0	19
246	12	1	2	support_	Shishu p	2	Gazipur	1	2	1	5	0	1	3	5	1	3	0	5	5	1	3	0	13	9	10	32	246	0	0	0	1	3	0	1	2	3	0	2	3	1	2	0	1	3	1	0	3	19
247	11	1	2	support_	Shishu p	2	Gazipur	1	4	1	0	0	0	0	0	0	0	1	0	5	3	0	0	1	5	3	9	247	0	0	0	0	3	3	0	3	0	3	3	1	0	0	0	0	0	0	0	3	19
248	11	1	2	support_	Shishu p	2	Gazipur	1	5	1	3	5	1	1	0	0	1	5	5	3	0	1	0	14	9	2	25	248	0	0	2	0	1	0	2	1	3	3	0	0	0	1	0	0	1	2	1	2	30
249	10	1	2	support_	Shishu p	2	Gazipur	1	4	1	3	0	1	0	1	3	3	1	1	0	0	3	1	5	6	6	17	249	1	1	3	3	0	1	1	1	1	1	1	3	0	1	2	1	2	3	1	3	26
250	10	1	2	support_	Shishu p	2	Gazipur	1	2	1	5	5	3	1	3	0	0	3	1	5	0	3	1	10	10	9	29	250	1	2	3	0	3	0	3	0	2	0	0	0	3	0	2	0	2	0	2	3	16
251	13	2	2	support_	Shishu p	2	Gazipur	1	4	1	3	0	0	0	1	3	3	1	0	1	3	3	0	4	7	7	18	251	1	1	2	0	0	1	0	1	0	0	1	3	2	1	2	1	0	1	0	2	27
252	12	1	2	support_	Shishu p	2	Gazipur	1	3	1	1	5	0	0	1	5	3	1	5	5	3	1	5	7	18	10	35	252	2	2	1	1	0	3	1	0	1	2	1	2	0	1	2	1	1	2	1	3	23
253	13	2	2	support_	Shishu p	2	Gazipur	1	4	1	3	5	0	1	5	0	0	3	1	0	1	5	3	8	5	14	27	253	1	0	1	0	0	1	0	2	1	1	1	1	2	1	2	1	0	2	3	3	15
254	14	2	2	support_	Shishu p	2	Gazipur	1	6	1	5	5	1	1	1	3	0	5	5	1	1	1	0	14	9	6	29	254	1	0	0	0	1	1	1	0	0	1	1	1	1	0	0	0	1	1	2	3	17
255	15	2	2	support_	Shishu p	2	Gazipur	1	8	1	3	3	0	1	5	0	5	3	1	5	0	5	0	8	13	10	31	255	1	0	1	0	1	2	0	0	0	1	1	1	3	1	0	2	0	1	0	3	27
256	13	2	2	support_	Shishu p	2	Gazipur	1	8	1	3	0	3	1	0	3	3	1	0	1	3	3	1	5	7	10	22	256	1	1	1	1	0	1	0	1	1	1	1	0	0	1	1	1	1	1	1	2	16
257	10	1	1	support_	Shishu p	2	Gazipur	1	2	1	3	0	5	3	1	0	0	1	1	1	3	3	1	8	1	13	22	257	1	0	1	0	1	1	0	1	1	1	1	1	0	1	1	0	1	0	1	3	14
258	14	2	2	support_	Shishu p	2	Gazipur	1	3	1	3	0	3	1	3	1	5	3	5	5	5	0	3	12	11	14	37	258	1	0	1	0	1	0	1	1	1	1	0	1	0	1	0	0	0	2	3	2	9
259	11	1	1	support_	Shishu p	2	Gazipur	1	7	1	1	0	3	1	3	0	0	5	1	0	1	0	0	8	0	7	15	259	1	0	1	1	0	1	1	1	0	1	1	1	1	1	1	0	1	0	1	0	11
260	10	1	1	support_	Shishu p	2	Gazipur	1	3	1	1	0	0	3	1	0	0	5	1	1	3	3	3	10	1	10	21	260	1	0	0	0	1	0	0	1	0	1	1	1	0	1	1	1	1	0	0	1	14
261	10	1	1	support_	Shishu p	2	Gazipur	1	3	1	0	0	0	3	1	0	0	3	1	0	1	3	3	7	0	8	15	261	1	0	1	0	1	1	0	1	0	1	1	0	1	1	1	1	1	1	0	1	13
262	9	1	1	support_	Shishu p	2	Gazipur	1	3	1	0	0	1	3	1	0	0	5	1	1	3	3	0	9	1	8	18	262	1	0	0	0	1	2	0	1	0	1	1	1	0	1	1	1	0	1	0	1	17
263	11	1	1	support_	Shishu p	2	Gazipur	1	3	1	1	5	3	5	1	5	0	1	5	1	3	1	0	12	11	8	31	263	1	0	0	0	1	1	0	1	0	1	0	1	2	2	0	2	1	1	2	1	24
264	10	1	1	support_	Shishu p	2	Gazipur	1	3	1	1	5	3	3	1	5	0	1	0	3	1	3	0	7	13	8	28	264	2	2	2	2	0	0	0	2	0	2	2	0	0	2	2	2	2	0	0	2	22
265	10	1	1	support_	Shishu p	2	Gazipur	1	3	1	1	0	5	0	1	0	1	0	0	1	3	0	1	1	2	10	13	265	2	2	0	0	0	3	0	0	0	2	2	0	1	2	2	0	2	0	1	3	11
266	11	1	1	support_	Shishu p	2	Gazipur	1	3	1	0	0	3	5	1	0	0	5	0	5	0	0	0	10	5	4	19	266	0	0	1	0	0	2	0	0	0	1	0	0	1	0	1	0	0	1	2	2	17
267	11	1	1	support_	Shishu p	2	Gazipur	1	0	2	1	1	0	0	0	0	3	0	0	0	0	0	0	1	4	0	5	267	0	1	0	1	0	0	0	0	1	1	0	1	2	1	1	2	0	1	2	1	27
268	9	1	1	support_	Shishu p	2	Gazipur	1	4	1	0	0	0	0	3	0	1	3	0	0	1	1	0	3	1	5	9	268	0	1	0	1	0	0	1	3	1	1	0	0	1	1	2	3	0	0	1	1	10
269	11	1	1	support_	Shishu p	2	Gazipur	1	4	1	1	5	0	0	1	0	3	1	3	0	0	0	3	5	8	4	17	269	0	1	0	1	0	0	0	1	0	0	0	1	1	0	1	0	1	1	1	1	12
270	9	1	1	support_	Shishu p	2	Gazipur	1	4	1	1	0	0	1	3	0	5	0	1	3	0	0	0	3	9	4	16	270	0	1	0	1	0	1	0	3	0	1	0	0	1	0	0	1	1	0	1	1	13
271	12	1	1	support_	Shishu p	2	Gazipur	1	4	1	0	0	0	0	0	0	1	0	0	1	0	0	0	0	2	0	2	271	0	0	0	1	0	0	0	0	1	1	0	0	2	0	0	0	1	0	0	3	20
272	11	1	1	support_	Shishu p	2	Gazipur	1	4	1	0	1	0	3	1	5	0	1	0	0	3	5	1	4	6	10	20	272	1	0	0	0	0	0	1	1	0	1	0	1	0	1	1	1	1	1	1	2	22
273	13	2	1	support_	Shishu p	2	Gazipur	1	5	1	3	1	5	1	1	3	5	0	1	0	3	0	3	9	8	12	29	273	1	1	0	0	1	2	1	0	0	1	1	2	0	0	1	1	1	2	3	2	32
274	13	2	1	support_	Shishu p	2	Gazipur	1	5	1	3	0	1	0	5	3	0	5	3	3	1	1	0	11	6	8	25	274	3	3	1	0	3	3	0	3	3	3	1	0	0	0	0	3	0	3	0	3	16
275	11	1	1	support_	Shishu p	2	Gazipur	1	5	1	0	1	5	0	0	3	1	1	0	5	0	5	3	1	10	13	24	275	1	1	3	2	1	0	0	0	1	1	1	2	0	2	1	1	1	1	2	1	13
276	13	2	1	support_	Shishu p	2	Gazipur	1	5	1	3	1	1	0	5	3	0	5	3	0	0	5	0	11	4	11	26	276	1	0	0	0	0	0	1	0	0	1	1	3	0	3	1	1	1	1	1	1	24
277	11	1	1	support_	Shishu p	2	Gazipur	1	5	3	3	5	0	1	5	0	1	1	0	1	0	0	0	5	7	5	17	277	1	2	0	0	1	0	1	0	0	1	2	2	0	0	1	0	1	1	2	2	10
278	12	1	1	support_	Shishu p	2	Gazipur	1	5	3	0	0	0	3	3	5	3	5	5	3	3	0	0	13	11	6	30	278	1	1	0	0	0	1	0	0	0	0	1	2	1	0	0	1	0	1	0	1	59
279	12	1	2	support_	ASK (kat	2	Dhaka	1	5	1	5	5	1	5	5	5	5	5	5	5	5	0	0	20	20	11	51	279	0	3	0	0	0	0	3	3	0	2	0	2	2	2	3	0	2	1	1	0	31
280	10	1	2	support_	ASK (kat	2	Dhaka	3	7	1	3	3	3	5	5	5	1	1	0	3	1	5	0	9	12	14	35	280	0	1	0	0	0	0	1	3	0	2	2	2	0	0	1	0	0	0	0	3	24
281	10	1	2	support_	ASK (kat	2	Dhaka	1	2	1	3	0	0	0	5	3	1	1	1	3	3	5	5	5	7	18	30	281	0	1	0	1	2	1	0	0	0	0	0	1	0	1	1	1	1	2	0	1	24
282	15	2	2	support_	ASK (kat	2	Dhaka	3	1	1	5	0	1	5	5	3	5	3	1	0	3	5	1	14	8	15	37	282	1	1	1	2	2	1	0	3	0	2	3	0	1	3	1	0	1	2	0	1	28
283	13	2	1	support_	ASK (kat	2	Dhaka	3	6	1	5	3	1	5	5	3	5	3	1	0	3	5	1	14	11	15	40	283	1	1	1	2	2	1	0	1	0	2	3	1	0	0	1	0	1	2	0	3	11
284	12	1	2	support_	ASK (kat	2	Dhaka	3	3	1	3	3	3	0	5	3	0	0	3	1	3	0	1	6	7	12	25	284	1	0	0	1	0	1	0	3	0	0	1	1	0	1	1	0	0	1	0	0	10
285	14	2	2	support_	ASK (kat	2	Dhaka	1	2	1	5	3	0	5	5	3	5	3	3	1	0	5	0	16	12	10	38	285	1	1	1	0	2	1	3	1	2	2	3	0	2	0	3	2	1	0	3	3	13
286	12	1	2	support_	ASK (kat	2	Dhaka	1	3	1	3	1	0	5	1	0	0	3	0	1	3	5	1	11	2	10	23	286	1	0	1	1	1	0	0	3	0	1	0	1	0	0	0	0	0	0	1	3	18
287	16	2	2	support_	ASK (kat	2	Dhaka	1	6	1	3	1	0	3	1	5	5	3	5	5	1	3	3	14	16	5	35	287	1	1	1	1	1	0	1	2	1	0	1	2	1	3	3	3	1	1	1	2	28
288	10	1	2	support_	ASK (kat	2	Dhaka	3	8	1	3	5	5	5	0	5	0	5	3	0	5	0	5	16	10	15	41	288	2	1	0	1	0	1	0	3	3	1	2	3	0	1	1	1	0	1	0	3	20
289	9	1	2	support_	ASK (kat	2	Dhaka	3	1	1	3	3	3	1	0	3	0	1	0	0	5	3	0	5	6	11	22	289	1	1	1	1	1	1	1	0	0	1	1	1	1	1	2	3	0	1	1	1	24
290	10	1	2	support_	ASK (kat	2	Dhaka	3	1	1	1	0	3	5	3	3	0	3	5	3	3	0	0	14	6	9	29	290	1	1	1	1	1	1	0	3	1	1	3	1	0	0	1	1	2	1	1	3	18
291	10	1	2	support_	ASK (kat	2	Dhaka	3	2	1	5	0	3	3	1	3	0	3	5	3	3	0	0	16	6	7	29	291	1	0	2	0	1	2	0	3	0	1	1	3	0	0	0	0	0	1	0	3	14
292	10	1	2	support_	ASK (kol	2	Dhaka	1	2	1	5	5	1	3	3	3	1	5	0	0	1	5	0	13	9	10	32	292	0	1	1	1	1	1	0	1	2	2	0	2	0	0	2	2	2	2	2	2	37
293	9	1	1	support_	ASK (kol	2	Dhaka	3	0	1	5	0	1	3	1	3	0	5	5	0	1	0	1	18	3	4	25	293	1	0	3	0	0	1	1	1	0	1	0	0	1	1	1	0	1	2	0	0	11
294	13	2	2	support_	ASK (kol	2	Dhaka	3	4	1	1	0	3	3	0	0	1	0	1	0	0	1	1	5	1	4	10	294	1	0	0	1	0	1	0	0	0	0	1	1	0	1	2	0	1	0	0	1	19
295	14	2	1	support_	ASK (kol	2	Dhaka	3	1	1	5	0	1	3	3	1	3	3	3	3	3	0	0	14	7	7	28	295	2	1	1	1	0	1	1	1	0	1	1	1	1	1	1	1	1	1	1	1	13
296	12	1	1	support_	ASK (kol	2	Dhaka	3	1	1	1	0	1	3	1	0	0	3	5	0	1	0	0	12	0	3	15	296	2	1	2	0	1	1	0	1	0	0	0	1	0	0	1	0	1	2	0	0	9
297	13	2	2	support_	ASK (kol	2	Dhaka	3	4	1	1	0	3	0	0	0	1	0	1	0	0	0	3	2	1	6	9	297	1	0	0	1	0	0	1	1	0	0	1	0	0	0	2	0	1	0	0	1	22
298	14	2	2	support_	ASK (kol	2	Dhaka	3	4	1	5	0	3	5	3	3	1	3	3	3	3	1	5	16	7	15	38	298	1	1	1	1	1	1	1	1	1	1	1	1	1	1	1	1	1	1	1	3	30
299	10	1	2	support_	ASK (kol	2	Dhaka	3	4	1	0	3	0	3	1	0	0	1	0	0	1	0	0	4	3	2	9	299	1	1	1	2	2	0	0	1	1	0	0	0	0	0	0	1	0	0	0	1	9
300	12	1	2	support_	ASK (kol	2	Dhaka	3	1	1	3	5	5	1	5	3	0	3	0	3	5	1	1	7	11	17	35	300	1	2	3	3	0	0	1	3	1	1	0	3	1	0	1	2	0	2	3	3	13
301	11	1	2	support_	ASK (kol	2	Dhaka	3	2	1	3	0	0	0	1	3	0	1	0	0	0	1	0	4	3	2	9	301	0	1	2	0	0	0	1	1	0	1	0	0	0	0	0	0	1	0	1	1	19
302	13	2	2	support_	ASK (kol	2	Dhaka	3	4	1	0	0	0	0	0	0	0	0	0	0	0	0	0	0	0	0	0	302	1	1	1	1	1	0	0	1	1	0	0	1	1	0	0	0	1	1	1	1	20
303	10	1	2	support_	ASK (kol	2	Dhaka	3	1	1	3	1	3	1	5	3	1	1	3	0	0	3	1	10	5	12	27	303	0	1	2	0	1	1	0	2	1	1	0	2	1	2	0	0	0	1	1	3	29
304	11	1	2	support_	ASK (kol	2	Dhaka	3	4	1	5	1	0	3	0	0	1	5	0	1	3	1	0	13	3	4	20	304	1	2	0	0	1	1	1	3	0	0	2	1	3	1	2	3	1	3	1	3	17
305	11	1	2	support_	ASK (kol	2	Dhaka	3	4	1	3	5	3	5	3	0	0	3	3	3	3	1	5	14	8	15	37	305	1	1	2	1	1	0	1	1	0	1	1	1	0	0	1	1	1	1	1	1	15
306	13	2	2	support_	ASK (kol	2	Dhaka	3	3	1	0	3	1	3	3	3	1	3	3	1	3	1	0	9	8	8	25	306	1	1	2	0	0	2	0	3	1	1	0	1	1	1	0	0	1	1	1	3	15
307	10	1	2	support_	ASK (kol	2	Dhaka	3	4	1	3	1	0	5	1	3	3	3	3	3	3	3	3	14	10	10	34	307	1	1	1	1	1	0	1	1	1	1	0	1	1	0	0	0	1	1	1	1	21
308	10	1	1	support_	ASK (kol	2	Dhaka	3	4	1	5	1	0	5	5	3	1	5	3	3	1	1	3	18	8	10	36	308	1	1	1	1	1	0	1	1	1	1	1	1	1	0	1	0	3	1	1	3	14
309	10	1	1	support_	ASK (kat	2	Dhaka	3	4	1	1	3	3	1	0	3	1	1	0	5	0	0	0	3	11	3	17	309	0	1	0	0	0	1	0	1	0	1	1	2	0	0	0	1	2	1	0	3	15
310	11	1	1	support_	ASK (kat	2	Dhaka	3	2	1	1	3	3	0	0	5	1	3	3	3	3	1	0	7	12	7	26	310	0	0	2	0	1	1	0	1	0	1	1	2	0	1	2	0	0	1	1	1	29
311	11	1	1	support_	ASK (kat	2	Dhaka	3	1	1	1	1	3	3	3	1	1	1	1	3	5	0	0	6	8	11	25	311	1	3	1	1	2	1	1	3	1	3	1	1	0	0	0	1	1	2	3	3	29
312	11	1	2	support_	ASK (kat	2	Dhaka	3	3	1	1	1	1	5	3	5	5	3	1	0	0	0	1	10	11	5	26	312	1	2	2	0	1	0	1	1	2	2	3	2	1	0	2	1	2	1	2	3	12
313	10	1	2	support_	ASK (kat	2	Dhaka	1	3	1	3	1	3	5	3	3	1	1	1	3	5	0	3	10	8	14	32	313	1	3	2	3	1	1	1	3	3	3	1	1	0	0	3	3	1	2	2	3	14
314	10	1	2	support_	ASK (kat	2	Dhaka	1	3	1	0	1	0	1	5	1	5	5	1	0	3	0	0	7	7	8	22	314	0	2	1	0	1	1	0	0	0	1	0	2	0	0	1	1	0	1	2	1	14
315	10	1	1	support_	ASK (kat	2	Dhaka	1	3	1	1	1	1	5	1	3	5	0	3	1	0	3	3	9	10	8	27	315	0	1	1	0	1	1	0	1	1	2	0	2	0	0	0	1	0	0	1	2	14
316	16	2	2	support_	ASK (kat	2	Dhaka	1	2	1	3	1	1	5	5	3	5	5	5	0	1	0	1	18	9	8	35	316	2	0	1	3	2	3	0	1	0	0	1	1	2	3	0	0	1	2	3	3	15
317	12	1	2	support_	ASK (kat	2	Dhaka	1	2	1	3	5	1	5	5	3	5	5	5	3	0	5	3	18	16	14	48	317	2	1	1	0	2	0	1	1	0	0	2	1	0	0	0	1	1	1	3	1	16
318	12	1	2	support_	ASK (kat	2	Dhaka	3	8	1	3	1	0	5	5	1	5	5	3	5	1	0	0	16	12	6	34	318	0	1	1	0	0	1	1	1	0	0	0	1	0	0	1	1	0	1	3	3	14
319	13	2	2	support_	ASK (kat	2	Dhaka	3	7	1	0	1	0	5	5	1	0	5	1	0	3	3	0	11	2	11	24	319	0	2	1	0	0	1	0	0	0	0	0	2	0	0	1	1	0	1	2	3	21
320	10	1	1	school	Dirai( V	1	Shunamga	1	6	1	3	5	0	3	0	1	0	0	5	3	0	1	0	11	9	1	21	320	0	0	0	0	0	0	1	0	0	0	0	0	0	0	0	1	0	0	1	2	9
321	10	1	1	school	Dirai( V	1	Shunamga	1	8	1	3	0	0	3	0	1	0	0	5	3	0	1	0	11	3	1	15	321	0	0	0	0	0	0	1	0	0	0	0	0	1	0	0	1	0	2	1	3	16
322	11	1	1	school	Dirai( V	1	Shunamga	1	5	1	3	5	0	3	1	3	3	1	0	5	0	0	0	7	16	1	24	322	1	1	1	0	0	1	0	1	1	2	0	0	0	2	1	1	0	0	1	3	31
323	11	1	1	school	Dirai( V	1	Shunamga	1	5	1	3	5	1	5	3	5	5	0	3	0	5	5	3	11	15	17	43	323	1	3	2	0	2	1	2	3	3	1	2	3	1	0	1	0	1	3	1	1	26
324	10	1	1	school	Dirai( V	1	Shunamga	1	5	1	3	1	5	0	3	3	3	3	0	5	3	1	1	6	7	18	31	324	1	0	1	1	2	0	1	3	2	1	3	1	2	0	1	3	2	1	0	1	24
325	10	1	1	school	Dirai( V	1	Shunamga	1	5	1	3	5	0	1	3	3	3	3	0	1	5	1	1	7	12	10	29	325	1	0	1	0	0	1	0	2	1	3	1	2	0	3	1	1	0	3	1	3	7
326	10	1	1	school	Dirai( V	1	Shunamga	1	5	1	3	5	3	3	1	5	0	0	1	0	0	3	0	7	10	7	24	326	1	0	1	0	1	0	0	1	0	0	0	1	0	0	1	0	0	0	0	1	7
327	10	1	1	school	Dirai( V	1	Shunamga	1	5	1	3	5	3	3	1	5	0	0	1	0	0	3	0	7	10	7	24	327	0	0	1	0	1	0	0	1	0	0	0	1	0	0	1	0	1	0	0	1	20
328	10	1	1	school	Dirai( V	1	Shunamga	1	5	1	5	1	0	0	1	0	5	3	0	1	0	1	0	8	7	2	17	328	1	0	2	1	1	1	0	1	0	1	1	2	3	1	1	0	2	1	0	1	10
329	11	1	1	school	Dirai( V	1	Shunamga	1	5	1	3	1	0	5	0	5	1	0	1	0	1	0	0	9	7	1	17	329	0	1	0	0	0	0	1	0	1	1	0	1	0	0	0	1	2	1	0	1	25
330	12	1	1	school	Dirai( V	1	Shunamga	1	5	1	3	5	5	0	3	1	5	3	3	5	5	0	5	9	16	18	43	330	1	0	2	1	0	1	0	1	0	1	0	2	3	1	0	2	1	2	1	2	22
331	12	1	2	school	Dirai( V	1	Shunamga	1	5	1	3	5	5	5	1	0	5	3	1	5	3	3	3	12	15	15	42	331	3	1	1	1	0	0	1	0	2	1	3	1	2	0	1	2	0	0	2	1	24
332	12	1	2	school	Dirai( V	1	Shunamga	1	5	1	3	5	5	5	1	5	3	3	1	5	3	3	3	9	18	15	42	332	1	3	1	1	0	0	1	0	2	2	0	2	3	3	0	0	0	3	2	0	16
333	11	1	2	school	Dirai( V	1	Shunamga	1	5	1	3	5	5	0	1	0	3	1	1	3	3	1	3	5	11	13	29	333	1	3	1	1	0	0	0	0	1	2	2	2	3	3	1	0	0	3	2	0	0
334	11	1	2	school	Dirai( V	1	Shunamga	1	5	1	3	0	3	0	0	0	0	3	0	0	0	0	0	6	0	3	9	334	0	0	0	0	0	0	0	0	0	0	0	0	0	0	0	0	0	0	0	0	0
335	11	1	2	school	Dirai( V	1	Shunamga	1	5	1	3	0	3	0	0	0	0	3	0	0	0	0	0	6	0	3	9	335	0	0	0	0	0	0	0	0	0	0	0	0	0	0	0	0	0	0	0	0	16
336	10	1	2	school	Dirai( V	1	Shunamga	1	5	1	0	1	0	0	0	0	0	0	0	1	0	3	1	5	8	3	16	336	0	1	0	0	0	2	0	0	1	0	1	0	1	0	3	1	2	2	0	2	25
337	12	1	2	school	Dirai( V	1	Shunamga	1	5	1	0	1	3	5	0	0	0	1	5	5	0	3	5	11	6	11	28	337	1	0	1	1	1	3	0	1	3	0	0	1	1	2	0	1	0	0	0	0	13
338	11	1	2	school	Dirai( V	1	Shunamga	1	5	1	3	1	1	3	0	0	0	0	0	0	0	0	0	6	1	1	8	338	1	0	0	1	3	3	0	0	0	1	0	1	2	3	3	1	2	0	3	1	17
339	12	1	2	school	Dirai( V	1	Shunamga	1	5	1	0	1	0	3	5	0	1	5	1	1	0	0	3	9	3	8	20	339	1	0	0	0	0	1	2	0	1	1	2	0	1	1	0	0	1	1	0	1	5
340	10	1	2	school	Dirai( V	1	Shunamga	1	5	1	3	0	1	3	1	0	3	0	3	1	0	3	3	9	4	8	21	340	0	1	1	0	0	1	0	3	0	1	0	0	1	0	1	1	0	3	1	3	15
341	10	1	2	school	Dirai( V	1	Shunamga	1	5	1	3	0	1	3	1	0	3	0	3	1	0	3	0	9	4	5	18	341	0	1	1	0	0	0	1	1	0	1	0	0	1	0	1	1	0	3	1	3	15
342	10	1	2	school	Dirai( V	1	Shunamga	1	5	1	3	0	1	3	1	0	3	0	3	1	0	3	0	9	4	5	18	342	0	1	1	0	0	0	1	1	0	1	0	0	1	0	1	1	0	3	1	3	14
343	11	1	2	school	Dirai( V	1	Shunamga	1	5	1	1	0	1	3	1	0	3	0	5	0	0	0	1	9	3	3	15	343	1	0	0	0	0	2	0	0	1	2	1	0	3	0	0	0	0	3	1	0	23
344	10	1	2	school	Dirai( V	1	Shunamga	1	5	1	3	1	3	0	5	1	3	0	3	3	5	3	0	6	8	16	30	344	3	0	0	0	2	1	2	1	1	2	0	0	3	0	1	2	1	1	2	1	10
345	10	1	2	school	Dirai( V	1	Shunamga	1	5	1	3	0	1	3	1	0	3	0	0	1	0	1	0	6	4	3	13	345	1	0	0	0	0	1	0	1	1	0	1	0	0	1	0	0	1	0	1	2	25
346	11	1	2	school	Dirai( V	1	Shunamga	1	5	1	3	3	3	0	1	3	1	0	1	0	0	0	0	4	7	4	15	346	3	1	3	1	0	0	1	1	0	1	1	1	3	0	1	2	2	0	3	1	23
347	10	1	2	school	Dirai( V	1	Shunamga	1	5	1	5	0	0	5	0	0	0	0	0	0	0	0	0	10	0	0	10	347	3	0	0	0	3	3	3	0	0	0	0	0	0	1	0	2	0	2	3	3	33
348	11	1	2	school	Dirai( V	1	Shunamga	1	5	1	5	0	0	5	0	0	5	5	5	1	0	5	0	20	5	5	30	348	3	1	0	0	3	3	3	0	0	1	2	0	2	3	3	2	0	1	3	3	36
349	10	1	2	school	Dirai( V	1	Shunamga	1	5	1	5	0	0	5	0	0	5	5	5	0	0	5	5	20	5	10	35	349	3	0	1	0	3	3	3	0	1	0	2	3	2	3	3	2	0	1	3	3	11
350	10	1	2	school	Dirai( V	1	Shunamga	1	5	1	5	1	3	3	1	0	3	1	5	1	3	1	1	14	5	9	28	350	0	0	0	0	1	0	1	1	0	1	0	1	0	0	1	0	1	3	0	1	8
351	10	1	2	school	Dirai( V	1	Shunamga	1	5	1	3	1	3	3	1	0	1	3	5	3	3	1	1	14	5	9	28	351	0	0	0	0	1	1	0	1	0	0	1	1	0	0	1	0	1	0	0	1	8
352	10	1	2	school	Dirai( V	1	Shunamga	1	5	1	3	5	0	1	3	0	0	3	0	0	1	0	3	7	5	7	19	352	0	0	0	0	0	1	0	1	0	0	1	1	0	1	0	1	0	0	1	1	12
353	11	1	2	school	Dirai( V	1	Shunamga	1	5	1	1	3	0	1	3	0	0	3	0	3	0	0	0	5	6	3	14	353	1	0	1	0	0	1	0	1	0	0	1	1	1	0	1	0	1	0	0	3	11
354	10	1	2	school	Dirai( V	1	Shunamga	1	5	1	3	0	1	3	1	0	3	0	0	1	0	0	0	6	4	2	12	354	1	0	0	0	0	1	0	1	1	0	1	0	0	1	0	0	1	0	1	3	1
355	9	1	1	school	Dirai( V	1	Shunamga	1	5	1	0	0	0	0	0	0	3	3	0	0	3	0	0	4	4	3	11	355	0	0	0	0	0	0	0	0	0	0	0	0	0	0	0	0	1	0	0	0	2
356	10	1	1	school	Dirai( V	1	Shunamga	1	4	1	0	0	0	0	0	0	0	0	0	0	0	0	0	0	0	0	0	356	0	0	0	0	0	0	0	0	0	0	0	0	0	0	0	1	1	0	0	0	4
357	10	1	1	school	Dirai( V	1	Shunamga	1	4	1	0	0	0	0	0	0	0	0	0	0	0	0	0	0	0	0	0	357	3	0	0	0	0	0	0	0	0	0	0	0	0	0	0	1	0	0	0	0	11
358	11	1	1	school	Dirai( V	1	Shunamga	1	4	1	0	0	0	0	0	0	0	0	0	0	0	0	0	0	0	0	0	358	2	2	2	1	2	0	1	0	0	0	0	0	0	0	1	0	0	0	0	0	3
359	12	1	1	school	Dirai( V	1	Shunamga	1	4	1	0	0	0	0	0	0	0	0	0	1	0	0	0	0	5	3	8	359	0	3	0	0	0	0	0	0	0	0	0	0	0	0	0	1	0	0	0	1	7
360	12	1	1	school	Dirai( V	1	Shunamga	1	4	1	0	5	0	1	0	3	1	0	1	0	1	0	0	2	9	1	12	360	0	1	0	0	0	1	0	1	0	0	0	0	1	0	0	1	0	1	0	1	7
361	10	1	1	school	Dirai( V	1	Shunamga	1	4	1	0	5	0	1	3	0	0	0	0	0	0	0	0	1	5	3	9	361	0	1	0	0	0	0	0	0	0	0	0	0	0	0	0	1	1	0	0	0	0
362	11	1	1	school	Dirai( V	1	Shunamga	1	4	1	0	0	0	0	0	0	0	0	0	0	0	0	0	0	0	0	0	362	0	0	0	0	0	0	0	0	0	0	0	0	0	0	0	0	0	0	0	0	10
363	10	1	1	school	Dirai( V	1	Shunamga	1	4	1	0	0	0	0	0	1	5	0	0	0	0	0	0	0	6	0	6	363	0	1	0	0	1	0	0	1	1	0	1	0	0	1	0	1	1	1	0	1	5
364	9	1	1	school	Dirai( V	1	Shunamga	1	4	1	0	5	0	0	0	0	0	0	0	0	0	0	0	0	5	0	5	364	0	3	0	0	0	0	0	0	0	0	0	0	0	0	0	1	1	0	0	0	10
365	9	1	1	school	Dirai( V	1	Shunamga	1	4	1	0	5	0	5	0	0	5	0	0	0	3	0	0	5	10	3	18	365	0	3	0	0	0	1	0	1	0	0	0	1	1	0	0	1	1	0	0	1	9
366	9	1	1	school	Dirai( V	1	Shunamga	1	4	1	0	5	0	5	0	0	5	3	0	0	3	0	0	8	10	3	21	366	0	3	0	0	0	1	0	1	0	0	0	0	0	0	1	1	1	0	0	1	4
367	10	1	1	school	Dirai( V	1	Shunamga	1	4	1	0	0	0	0	1	1	0	0	0	0	0	0	0	0	1	1	2	367	0	0	0	0	0	0	0	0	0	0	0	0	0	0	0	0	0	1	0	3	11
368	11	1	1	school	Dirai( V	1	Shunamga	1	4	1	0	3	1	1	0	5	0	1	5	0	0	0	0	7	8	1	16	368	0	3	0	1	0	1	0	1	0	0	0	0	0	0	1	2	1	0	0	1	7
369	10	1	1	school	Dirai( V	1	Shunamga	1	4	1	5	0	0	5	0	0	0	0	0	0	0	0	0	10	0	0	10	369	0	3	0	0	0	1	0	0	0	0	0	0	0	0	1	1	1	0	0	0	6
370	10	1	1	school	Dirai( V	1	Shunamga	1	4	1	5	0	0	0	0	0	0	0	0	0	0	0	0	5	0	0	5	370	0	3	0	0	0	0	0	0	0	0	0	0	0	0	1	1	0	0	0	1	6
371	9	1	2	school	Dirai( V	1	Shunamga	1	4	1	0	5	0	3	0	3	1	5	0	3	0	0	0	8	12	0	20	371	0	1	0	0	1	0	1	0	0	0	0	0	1	0	0	0	0	1	0	1	7
372	11	1	2	school	Dirai( V	1	Shunamga	1	4	1	5	3	1	5	5	3	1	5	3	5	3	1	3	18	12	13	43	372	0	3	0	0	0	1	0	0	0	0	0	0	0	0	1	0	1	0	0	1	19
373	10	1	2	school	Dirai( V	1	Shunamga	1	4	1	5	3	1	5	1	3	1	5	0	0	1	0	0	15	7	3	25	373	0	3	0	3	0	1	1	1	0	0	0	0	0	1	1	2	1	2	0	3	18
374	9	1	2	school	Dirai( V	1	Shunamga	1	6	1	0	3	3	5	3	1	5	1	5	0	3	3	0	11	9	6	26	374	0	3	0	1	1	2	0	1	3	0	0	1	0	1	3	1	0	1	0	0	6
375	10	1	2	school	Dirai( V	1	Shunamga	1	4	1	1	1	1	1	1	3	0	0	1	0	0	0	0	1	3	0	4	375	0	1	0	0	0	0	0	1	0	0	0	0	0	0	1	1	0	1	0	1	5
376	9	1	2	school	Dirai( V	1	Shunamga	1	4	1	0	0	0	0	5	5	0	0	5	0	0	0	0	5	5	5	15	376	0	3	0	0	0	0	0	0	0	0	0	0	0	0	1	0	0	0	0	1	6
377	9	1	2	school	Dirai( V	1	Shunamga	1	4	1	0	0	0	0	0	5	0	0	0	0	0	0	0	0	5	0	5	377	0	3	0	0	0	0	0	0	0	0	0	0	0	0	1	1	1	0	0	0	0
378	9	1	2	school	Dirai( V	1	Shunamga	1	4	1	0	0	0	0	0	0	0	0	0	0	0	0	0	0	0	0	0	378	0	0	0	0	0	0	0	0	0	0	0	0	0	0	0	0	0	0	0	0	7
379	9	1	2	school	Dirai( V	1	Shunamga	1	4	1	0	0	0	0	0	0	0	0	0	0	0	0	0	0	0	0	0	379	0	3	0	0	0	0	0	1	0	0	0	0	0	1	1	0	0	0	0	1	14
380	12	1	2	school	Dirai( V	1	Shunamga	1	4	1	0	0	0	0	0	0	0	0	0	0	0	0	0	0	0	0	0	380	0	3	0	0	0	0	0	1	0	1	0	0	0	0	0	1	0	0	0	1	3
381	10	1	2	school	Dirai( V	1	Shunamga	1	4	1	0	0	1	0	1	0	0	1	0	0	1	0	0	1	0	3	4	381	0	0	1	0	0	1	2	0	0	1	0	1	1	1	1	2	0	2	1	0	8
382	9	1	2	school	Dirai( V	1	Shunamga	1	4	1	5	1	3	5	3	1	0	3	5	1	0	3	0	18	3	9	30	382	0	2	0	0	0	1	0	0	1	0	0	0	0	0	1	1	1	0	0	1	10
383	10	1	2	school	Dirai( V	1	Shunamga	1	4	1	0	1	3	0	3	1	0	1	0	0	0	0	0	1	2	6	9	383	3	0	0	0	0	0	2	0	0	0	0	0	0	2	0	1	0	2	0	0	11
384	10	1	2	school	Dirai( V	1	Shunamga	1	4	1	5	5	1	3	3	0	0	0	1	0	0	0	0	9	5	4	18	384	2	3	0	0	0	0	0	2	0	0	0	0	0	0	2	1	1	0	0	0	8
385	9	1	2	school	Dirai( V	1	Shunamga	1	4	1	5	5	5	3	5	1	0	1	3	0	0	0	0	12	6	8	26	385	0	3	0	0	0	0	0	0	0	0	0	0	0	0	0	1	1	2	0	1	16
386	10	1	2	school	Dirai( V	1	Shunamga	1	4	1	5	5	5	1	5	3	1	0	5	1	0	0	0	11	10	10	31	386	0	3	0	0	0	1	0	3	0	0	0	0	0	0	3	1	1	1	0	3	9
387	9	1	2	school	Dirai( V	1	Shunamga	1	4	1	0	0	0	0	0	0	0	0	0	0	0	0	0	0	0	0	0	387	0	0	0	2	0	0	1	2	0	1	2	1	0	0	0	0	0	0	0	0	4
388	9	1	2	school	Dirai( V	1	Shunamga	1	4	1	0	0	5	0	0	0	0	0	0	0	0	0	0	0	0	5	5	388	0	1	0	0	0	1	0	1	0	0	0	0	0	0	1	0	0	0	0	0	6
389	10	1	2	school	Dirai( V	1	Shunamga	1	4	1	0	0	5	0	0	0	0	0	0	0	0	0	0	0	3	1	4	389	0	3	0	0	0	0	0	0	0	0	0	0	0	0	1	1	0	0	0	1	11
390	10	1	2	school	Dirai( V	1	Shunamga	1	4	1	0	0	0	0	1	3	0	0	0	0	0	0	0	0	1	5	6	390	0	3	3	0	0	1	0	1	0	0	0	0	0	0	1	0	1	0	0	1	2
391	12	1	2	school	Dirai( V	1	Shunamga	1	4	1	0	0	5	0	0	1	0	0	0	0	0	0	0	0	1	0	1	391	0	0	0	0	0	0	0	0	0	0	0	0	0	0	0	1	1	0	0	1	11
392	9	1	2	school	Dirai( V	1	Shunamga	1	4	1	0	0	0	0	0	1	0	0	0	0	0	0	0	0	4	0	4	392	0	0	0	0	0	0	0	0	0	0	0	0	0	0	0	1	0	0	0	1	7
393	11	1	1	school	Dirai( V	1	Shunamga	1	4	1	0	0	0	0	0	1	0	0	0	3	0	0	0	5	0	0	5	393	0	3	0	0	0	1	0	0	0	0	0	0	0	0	0	1	1	0	0	1	7
394	15	2	1	school	Dirai( V	1	Shunamga	1	4	1	5	0	0	0	0	0	0	0	0	0	0	0	0	21	13	1	35	394	1	0	2	1	1	1	0	1	0	1	0	1	1	1	0	0	0	1	1	1	26
395	16	2	1	school	Dirai( V	1	Shunamga	1	10	1	3	5	0	3	1	1	5	5	5	3	0	1	0	8	3	12	23	395	1	1	1	0	1	1	1	3	1	2	1	1	1	0	1	2	1	3	1	3	16
396	16	2	1	school	Dirai( V	1	Shunamga	1	10	1	3	3	5	1	1	0	1	5	0	0	3	0	3	12	8	12	32	396	1	1	0	0	0	0	0	1	0	2	0	1	2	0	2	1	1	1	2	1	17
397	16	2	1	school	Dirai( V	1	Shunamga	1	10	1	3	3	1	3	3	3	1	3	3	0	3	5	1	18	7	7	32	397	1	0	0	0	1	2	1	0	1	0	2	1	0	0	1	0	1	3	1	2	16
398	15	2	1	school	Dirai( V	1	Shunamga	3	10	1	3	0	1	5	0	1	3	5	5	3	1	0	5	12	0	9	21	398	1	1	0	0	1	1	0	1	1	0	1	1	1	1	0	1	1	0	1	1	12
399	17	2	1	school	Dirai( V	1	Shunamga	1	9	1	3	0	0	3	3	0	0	3	3	0	3	3	0	14	6	2	22	399	1	1	2	1	0	0	1	1	1	0	0	2	1	1	0	0	0	1	1	2	23
400	16	2	1	school	Dirai( V	1	Shunamga	1	10	1	3	1	1	5	0	0	0	3	3	5	0	1	0	7	7	6	20	400	1	1	0	0	3	3	1	1	3	0	3	1	1	0	1	0	3	0	0	1	16
401	16	2	1	school	Dirai( V	1	Shunamga	1	10	1	1	0	0	3	1	3	1	3	0	3	0	5	0	13	14	6	33	401	1	0	1	0	0	1	0	1	1	2	1	2	2	0	0	0	0	0	1	3	11
402	15	2	1	school	Dirai( V	1	Shunamga	1	10	1	3	5	1	5	1	3	3	5	0	3	3	0	1	3	2	10	15	402	1	0	1	0	0	0	1	1	0	0	0	1	0	1	1	1	0	0	1	2	10
403	14	2	1	school	Dirai( V	1	Shunamga	1	9	1	3	0	1	0	3	0	1	0	0	1	0	1	5	15	5	14	34	403	1	0	1	0	0	1	0	1	0	0	0	1	1	0	1	0	0	1	1	2	11
425	13	2	1	school	Dirai( V	1	Shunamga	1	9	1	1	0	0	1	5	0	5	5	1	5	3	0	0	8	10	8	26	425	1	0	1	0	0	0	0	0	0	0	1	2	1	0	0	0	1	0	2	2	9
426	13	2	1	school	Dirai( V	1	Shunamga	1	8	1	3	0	0	1	3	0	5	3	0	5	0	0	0	7	10	3	20	426	1	0	0	0	0	1	0	0	0	1	1	1	0	0	0	0	0	1	1	2	6
427	14	2	2	school	Dirai( V	1	Shunamga	1	8	1	3	0	0	1	1	1	0	3	3	0	0	3	0	10	1	4	15	427	0	0	1	0	0	0	0	1	0	0	0	1	1	1	0	0	0	0	0	1	13
428	14	2	1	school	Dirai( V	1	Shunamga	1	8	1	3	0	0	3	0	5	5	5	5	0	0	1	0	16	10	1	27	428	1	0	0	0	0	0	0	0	1	1	0	1	3	3	0	0	0	1	1	1	15
429	14	2	1	school	Dirai( V	1	Shunamga	1	8	1	1	5	0	1	1	5	5	1	1	5	0	5	0	4	20	6	30	429	1	1	1	2	1	1	0	0	0	2	1	1	1	0	0	0	1	1	1	0	9
430	14	2	2	school	Dirai( V	1	Shunamga	1	8	1	3	3	0	1	1	5	0	3	3	0	0	3	0	10	5	4	19	430	0	0	1	0	0	0	1	1	0	1	1	1	0	0	0	1	1	0	1	0	12
431	14	2	1	school	Dirai( V	1	Shunamga	1	8	1	3	5	1	1	3	1	5	5	1	0	3	0	1	10	11	8	29	431	1	0	2	0	0	0	0	0	0	1	0	1	1	0	0	0	1	1	2	2	13
432	14	2	1	school	Dirai( V	1	Shunamga	1	8	1	3	5	1	1	3	5	1	3	3	0	3	1	0	10	11	8	29	432	1	0	0	1	1	1	0	0	0	2	1	0	0	1	1	0	1	1	0	2	9
433	15	2	2	school	Dirai( V	1	Shunamga	1	8	1	3	1	0	1	3	0	0	1	0	1	0	0	0	5	2	3	10	433	0	0	1	0	0	0	1	1	0	1	1	1	1	1	1	0	0	0	0	1	21
434	14	2	1	school	Dirai( V	1	Shunamga	1	8	1	0	3	3	1	3	1	5	3	1	3	0	1	3	5	12	10	27	434	1	0	0	0	1	1	0	0	1	1	0	0	1	0	0	2	0	1	0	0	13
435	14	2	1	school	Dirai( V	1	Shunamga	3	8	1	3	0	0	1	1	0	0	3	5	0	3	0	0	12	0	4	16	435	1	1	2	2	2	3	0	3	3	1	3	2	2	1	1	1	2	0	1	2	15
436	14	2	1	school	Dirai( V	1	Shunamga	1	8	1	0	0	0	3	1	0	1	3	0	3	0	5	0	6	4	6	16	436	1	1	0	0	0	0	1	1	1	0	0	0	0	1	1	0	3	1	1	1	6
437	13	2	2	school	Dirai( V	1	Shunamga	1	8	1	3	0	0	1	0	0	3	3	3	3	1	0	0	10	6	1	17	437	1	0	1	0	0	0	0	1	0	0	0	0	0	0	1	0	1	0	0	1	10
438	12	1	1	school	Dirai( V	1	Shunamga	1	8	2	3	0	3	1	3	0	3	3	0	0	1	0	0	7	3	4	14	438	0	2	0	0	0	1	1	0	0	0	0	0	1	0	0	1	1	1	1	3	12
439	14	2	2	school	Dirai( V	1	Shunamga	1	6	1	3	0	3	1	0	3	3	1	3	3	0	3	0	8	9	6	23	439	1	0	1	0	0	1	0	1	1	1	0	1	1	0	0	0	0	0	1	1	12
440	12	1	1	school	Dirai( V	1	Shunamga	1	8	2	3	0	0	1	3	0	3	3	0	0	1	0	0	7	3	4	14	440	0	2	0	0	0	1	1	0	0	0	0	0	1	0	0	1	1	1	1	3	15
441	12	1	1	school	Dirai( V	1	Shunamga	1	6	1	3	0	0	0	0	0	0	0	0	0	3	0	0	3	0	3	6	441	0	1	0	0	1	0	0	1	1	3	0	1	0	0	0	0	0	3	1	0	12
442	13	2	2	school	Dirai( V	1	Shunamga	1	6	1	3	0	0	1	0	3	3	1	3	1	1	3	0	8	7	4	19	442	1	0	1	0	0	1	1	1	1	1	0	1	1	1	0	0	0	0	1	1	25
443	10	1	1	school	Dirai( V	1	Shunamga	1	8	1	1	3	3	0	3	3	1	0	1	3	0	1	3	2	10	10	22	443	0	1	0	1	0	0	1	0	1	0	1	0	0	0	1	0	0	1	0	0	19
444	11	1	1	school	Dirai( V	1	Shunamga	1	6	1	1	0	0	3	1	1	0	1	3	0	5	0	0	8	1	6	15	444	1	1	3	0	0	1	0	0	0	1	0	2	3	0	0	0	1	2	1	3	5
445	14	2	2	school	Dirai( V	1	Shunamga	1	6	1	1	0	5	1	5	3	5	3	5	3	0	5	0	9	11	15	35	445	1	0	3	0	2	3	1	2	3	1	2	0	1	0	1	0	0	3	1	1	17
446	12	1	1	school	Dirai( V	1	Shunamga	1	8	1	3	0	3	0	1	0	0	3	1	5	3	1	5	7	5	13	25	446	1	0	0	0	0	0	1	3	1	0	1	1	0	0	1	1	0	1	3	3	25
447	13	2	2	school	Dirai( V	1	Shunamga	1	6	1	3	5	1	3	1	1	1	3	5	5	1	3	1	14	12	7	33	447	1	0	2	0	1	2	1	2	1	0	1	1	0	2	1	1	2	1	3	3	13
448	12	1	1	school	Dirai( V	1	Shunamga	1	8	1	1	3	0	1	0	0	5	3	0	5	0	3	1	5	13	4	22	448	1	0	0	0	3	1	1	0	1	1	0	1	2	0	1	0	0	0	1	0	17
449	12	1	1	school	Dirai( V	1	Shunamga	1	6	1	1	3	0	1	0	3	5	3	0	5	0	3	0	5	16	3	24	449	1	0	0	0	3	1	1	0	1	1	0	1	2	0	1	0	0	1	2	2	17
450	15	2	2	school	Dirai( V	1	Shunamga	1	6	1	1	0	3	1	3	0	1	3	1	1	0	0	1	6	2	7	15	450	1	0	1	0	1	1	0	1	0	1	1	1	1	2	1	2	2	1	1	3	11
451	13	2	1	school	Dirai( V	1	Shunamga	1	8	1	1	0	3	3	0	3	5	3	0	3	0	3	0	7	11	6	24	451	1	1	0	0	0	0	0	1	0	0	1	2	3	0	0	1	1	1	2	3	15
452	14	2	1	school	Dirai( V	1	Shunamga	1	8	1	1	0	3	3	0	3	0	0	0	5	0	0	1	4	8	4	16	452	1	1	0	0	0	0	0	1	0	0	0	2	3	0	0	1	1	0	2	3	6
453	14	2	2	school	Dirai( V	1	Shunamga	1	8	1	3	0	3	1	0	0	5	5	0	5	0	0	0	9	10	3	22	453	0	0	1	0	0	0	1	1	0	0	0	0	1	0	1	0	0	0	0	1	16
454	13	2	2	school	Dirai( V	1	Shunamga	1	8	1	3	0	3	5	1	1	5	5	1	3	0	1	0	14	9	5	25	454	1	0	1	0	1	0	1	0	0	0	1	2	3	1	1	0	1	0	2	1	24
455	13	2	2	school	Dirai( V	1	Shunamga	1	8	2	3	0	3	5	1	1	5	5	1	3	0	1	0	14	9	5	28	455	1	0	1	0	1	0	1	0	0	0	1	2	3	1	1	0	2	0	0	1	7
456	13	2	2	school	Dirai( V	1	Shunamga	1	8	1	3	5	1	3	1	1	1	3	5	5	1	3	1	14	12	7	33	456	1	0	2	0	1	2	1	2	1	0	1	2	0	0	1	1	2	2	2	3	17
457	13	2	1	school	Dirai( V	1	Shunamga	1	8	1	1	5	0	3	3	1	0	1	3	0	3	3	0	8	6	9	23	457	1	1	0	0	0	0	1	0	1	1	0	1	2	0	2	2	1	0	3	1	14
458	12	1	1	school	Dirai( V	1	Shunamga	1	7	1	3	1	3	3	0	0	5	3	3	1	1	3	0	12	7	7	26	458	1	0	1	0	1	0	0	1	1	0	1	1	1	1	1	1	1	0	0	2	19
459	11	1	2	school	Dirai( V	1	Shunamga	1	6	1	1	3	0	0	1	0	1	1	3	0	0	0	0	5	4	1	10	459	1	0	0	0	1	0	0	1	0	0	0	0	1	0	0	0	0	0	1	0	19
460	12	1	2	school	Dirai( V	1	Shunamga	1	7	1	1	0	0	0	1	0	0	0	1	0	5	3	0	2	0	9	11	460	1	1	0	0	0	0	1	0	0	0	1	1	2	1	2	3	2	1	1	2	6
461	12	1	1	school	Dirai( V	1	Shunamga	1	6	1	0	1	0	1	0	3	0	1	3	0	0	0	0	5	4	0	9	461	1	0	0	0	0	0	0	0	0	1	0	1	1	0	0	0	0	0	1	1	11
462	12	1	1	school	Dirai( V	1	Shunamga	1	7	1	5	0	1	0	0	3	0	5	0	0	3	0	3	10	3	6	19	462	1	0	0	3	0	0	0	0	0	0	0	1	2	0	1	0	0	0	2	1	10
463	12	1	2	school	Dirai( V	1	Shunamga	1	6	1	0	3	0	1	0	0	5	1	0	0	0	3	0	2	8	3	13	463	1	0	0	0	0	1	0	0	0	1	1	1	2	1	0	1	0	0	0	1	10
464	12	1	1	school	Dirai( V	1	Shunamga	1	7	1	1	3	0	0	0	0	1	3	0	1	3	1	0	4	5	4	13	464	1	1	0	0	0	0	0	0	0	0	1	1	1	0	0	0	1	0	1	3	9
465	11	1	2	school	Dirai( V	1	Shunamga	1	7	1	0	1	0	5	1	0	5	3	1	0	3	5	3	9	6	12	27	465	1	1	0	0	1	0	1	1	1	1	2	0	1	0	2	1	0	1	2	3	14
466	11	1	2	school	Dirai( V	1	Shunamga	1	6	1	0	3	0	1	0	0	5	1	0	0	0	3	0	2	8	3	13	466	1	0	1	0	0	1	1	0	0	3	0	1	1	1	1	0	1	0	0	2	8
467	12	1	1	school	Dirai( V	1	Shunamga	1	7	1	3	0	1	0	0	0	0	3	0	3	3	0	0	6	3	4	13	467	1	1	0	0	0	3	0	0	0	0	1	0	0	1	0	0	2	0	0	0	20
468	12	1	1	school	Dirai( V	1	Shunamga	1	7	1	0	1	3	0	0	1	3	0	5	0	1	3	5	5	5	12	22	468	1	1	0	2	1	0	2	3	1	0	0	0	0	1	0	2	0	1	3	2	12
469	10	1	2	school	Dirai( V	1	Shunamga	1	6	1	0	0	0	0	0	0	0	1	0	0	0	5	0	1	0	5	6	469	0	1	0	0	0	0	0	0	0	0	1	2	1	0	2	0	0	0	0	1	7
470	15	2	2	school	Dirai( V	1	Shunamga	1	6	1	0	0	3	3	0	0	0	0	0	0	3	3	0	3	0	9	12	470	1	1	0	0	1	0	0	1	0	0	0	0	1	1	0	0	1	1	0	3	23
471	10	1	2	school	Dirai( V	1	Shunamga	1	7	1	0	0	0	0	0	0	3	0	0	3	0	0	0	0	6	0	6	471	0	0	1	1	1	0	0	0	0	0	0	0	1	1	0	1	0	0	0	1	17
472	12	1	1	school	Dirai( V	1	Shunamga	1	6	1	0	0	1	1	3	0	0	0	0	1	3	0	1	1	1	8	10	472	0	1	0	1	0	0	1	0	1	0	1	0	0	1	0	1	0	2	3	0	9
473	12	1	1	school	Dirai( V	1	Shunamga	1	6	1	0	0	3	0	0	3	0	3	0	0	3	3	0	3	3	9	15	473	1	1	0	0	0	0	0	0	0	0	0	0	1	0	0	0	0	0	3	3	15
474	12	1	2	school	Dirai( V	1	Shunamga	1	7	1	3	0	5	0	0	0	5	5	0	0	0	5	0	8	5	10	23	474	1	0	1	1	0	1	0	3	1	1	0	0	1	0	0	0	1	1	2	1	37
475	13	2	2	school	Dirai( V	1	Shunamga	1	6	1	3	5	0	1	3	5	1	0	3	0	1	5	0	7	11	9	27	475	1	0	0	2	3	0	3	2	3	2	3	0	3	2	0	2	2	3	3	3	14
476	13	2	1	school	Dirai( V	1	Shunamga	1	7	1	0	0	0	0	1	0	0	3	0	0	3	1	0	3	0	5	8	476	0	1	0	0	0	0	0	3	0	2	0	0	1	0	0	0	1	0	3	3	15
477	12	1	1	school	Dirai( V	1	Shunamga	1	7	1	3	5	1	0	1	3	5	3	3	1	3	3	0	9	14	8	31	477	1	0	0	0	1	1	0	1	0	0	0	1	1	1	1	1	1	1	1	3	11
478	11	1	2	school	Dirai( V	1	Shunamga	1	6	1	3	3	0	1	0	1	3	0	1	3	5	5	0	5	10	5	20	478	1	1	1	0	0	1	1	1	0	1	1	0	1	0	1	1	1	1	3	1	9
479	12	1	2	school	Dirai( V	1	Shunamga	1	7	1	0	1	3	5	3	1	3	0	5	1	3	5	1	10	6	15	31	479	1	1	1	2	3	0	0	0	0	0	0	1	0	1	0	0	0	0	1	0	12
480	12	1	1	school	Dirai( V	1	Shunamga	1	6	1	0	0	5	0	1	0	0	3	0	0	3	1	0	3	0	10	13	480	0	1	0	0	0	0	0	3	0	0	0	0	1	0	0	0	1	0	3	3	13
481	12	1	1	school	Dirai( V	1	Shunamga	1	7	1	3	0	0	0	3	1	0	0	3	1	1	3	0	6	2	7	15	481	0	0	1	1	0	0	0	0	2	0	0	2	0	0	0	2	0	1	1	3	5
482	12	1	2	school	Dirai( V	1	Shunamga	1	6	1	0	0	0	1	0	0	3	1	0	0	0	0	0	2	3	0	5	482	0	1	0	0	1	0	0	0	0	0	0	0	1	0	1	0	0	0	0	1	18
483	12	1	2	school	Dirai( V	1	Shunamga	1	6	1	3	3	1	3	5	0	0	0	3	0	3	0	0	9	3	9	21	483	1	1	0	1	0	0	1	1	0	0	0	2	1	1	0	1	2	0	3	3	9
484	10	1	1	school	Dirai( V	1	Shunamga	1	7	1	5	0	1	0	1	3	0	1	1	0	0	0	0	7	3	2	12	484	0	1	0	0	0	0	0	1	0	0	1	0	0	0	0	1	1	1	3	0	8
485	12	1	1	school	Dirai( V	1	Shunamga	1	6	1	0	0	5	0	1	0	0	3	0	0	0	1	0	3	0	7	10	485	0	1	0	0	0	0	0	0	0	0	0	0	1	0	0	0	1	0	3	3	11
486	10	1	2	school	Dirai( V	1	Shunamga	1	7	1	0	0	1	0	1	3	0	0	0	0	0	5	0	0	3	7	10	486	1	1	0	0	0	0	1	0	0	1	0	0	2	0	0	0	2	0	0	0	23
487	11	1	2	school	Dirai( V	1	Shunamga	1	6	1	3	1	3	3	3	1	0	5	3	0	1	3	0	14	2	10	26	487	1	1	0	0	0	3	1	1	1	2	2	1	0	1	1	1	1	2	3	1	13
488	11	1	1	school	Dirai( V	1	Shunamga	1	7	1	0	0	0	3	1	0	3	0	1	0	3	0	0	4	3	4	11	488	0	1	1	0	0	0	2	1	0	1	0	0	1	1	1	0	1	0	1	2	7
489	12	1	1	school	Dirai( V	1	Shunamga	1	7	1	0	5	0	1	0	0	0	0	0	0	0	0	0	1	5	0	6	489	0	0	1	0	0	0	1	0	0	1	0	1	1	1	0	0	1	0	3	1	13
490	12	1	1	school	Dirai( V	1	Shunamga	1	7	1	3	5	1	0	3	1	3	1	1	5	5	3	0	5	14	12	31	490	1	0	1	1	1	1	0	1	0	0	0	1	1	1	0	1	0	0	1	2	9
491	12	1	2	school	Dirai( V	1	Shunamga	1	7	1	0	0	0	0	0	0	3	0	0	0	0	1	0	0	3	1	4	491	1	0	1	1	0	0	1	0	0	0	0	0	1	0	0	1	1	0	1	1	7
492	9	1	1	school	Dirai( V	1	Shunamga	1	6	1	0	3	0	1	3	0	1	0	1	0	1	3	1	2	4	8	14	492	0	1	3	0	0	0	0	0	0	1	0	0	1	0	0	0	0	0	1	0	27
493	12	1	2	school	Dirai( V	1	Shunamga	1	6	1	0	0	1	0	0	3	0	3	0	0	3	3	0	3	3	7	13	493	1	1	0	0	1	0	0	0	0	0	1	0	1	0	0	0	0	0	1	1	20
494	12	1	1	school	Dirai( V	1	Shunamga	1	7	1	5	0	3	3	3	5	1	5	0	1	0	5	0	13	7	11	31	494	1	0	0	0	0	0	0	1	1	1	1	2	3	0	1	2	3	1	0	3	13
495	12	1	1	school	Dirai( V	1	Shunamga	1	7	1	0	3	1	1	0	3	0	0	3	5	3	1	0	4	11	5	20	495	1	1	0	0	0	0	1	1	1	2	1	0	1	0	1	1	0	1	0	1	20
496	12	1	1	school	Dirai( V	1	Shunamga	1	7	1	5	0	3	0	0	5	5	0	5	5	1	5	5	10	15	14	39	496	2	3	0	0	0	0	0	0	1	1	2	1	0	0	0	0	1	3	3	3	17
497	14	2	1	school	Dirai(Ch	1	Shunamga	1	7	2	0	0	0	3	0	1	0	0	0	1	0	1	0	3	2	1	6	497	1	1	0	0	0	0	1	0	0	0	1	0	1	0	0	1	0	0	1	0	31
498	14	2	2	school	Dirai(Ch	1	Shunamga	1	9	2	3	1	0	3	0	0	3	0	3	1	0	3	0	9	5	3	17	498	1	2	1	2	0	1	1	3	1	1	3	2	1	2	1	1	3	1	3	1	18
499	15	2	1	school	Dirai(Ch	1	Shunamga	1	9	2	0	0	0	1	3	0	1	3	1	1	5	0	0	5	2	8	15	499	1	0	0	0	0	0	0	1	0	1	0	0	0	0	0	0	0	0	1	1	31
500	14	2	2	school	Dirai(Ch	1	Shunamga	1	9	2	3	5	3	5	3	3	1	5	3	1	0	5	5	16	10	16	42	500	1	1	1	0	0	0	1	1	1	0	3	1	0	0	1	1	3	1	1	1	4
501	14	2	1	school	Dirai(Ch	1	Shunamga	1	9	2	0	0	0	0	0	1	1	0	0	1	0	5	1	0	3	6	9	501	0	0	0	0	0	1	0	0	0	0	0	1	1	0	0	0	1	0	0	0	29
502	13	2	2	school	Dirai(Ch	1	Shunamga	1	9	2	5	0	3	3	3	0	1	3	3	3	5	5	5	13	6	21	40	502	2	1	0	2	0	1	0	3	0	2	1	3	1	1	1	2	1	3	3	2	21
503	14	2	1	school	Dirai(Ch	1	Shunamga	1	9	2	5	5	0	0	0	1	5	1	0	3	5	0	5	6	14	10	30	503	1	0	1	0	0	1	0	1	1	2	3	2	0	2	1	1	1	2	2	0	19
504	13	2	2	school	Dirai(Ch	1	Shunamga	1	9	2	5	0	3	3	0	1	3	3	1	3	0	0	1	12	7	4	23	504	1	1	1	0	1	1	0	1	0	1	1	1	1	0	0	1	1	1	3	3	26
505	14	2	1	school	Dirai(Ch	1	Shunamga	1	9	2	1	5	0	3	1	0	5	5	0	5	5	0	0	9	15	6	30	505	0	0	1	0	0	2	1	1	1	3	0	2	2	0	1	3	1	3	2	3	13
506	14	2	1	school	Dirai(Ch	1	Shunamga	1	9	2	1	0	0	3	1	1	0	3	1	1	1	3	0	8	2	5	15	506	0	0	0	0	0	1	1	0	1	1	2	2	1	1	0	0	0	1	1	1	13
507	14	2	1	school	Dirai(Ch	1	Shunamga	1	9	2	0	0	0	3	3	1	3	3	3	0	0	0	0	12	4	3	19	507	1	0	0	0	0	1	0	1	0	1	0	1	1	1	1	0	1	1	1	2	22
508	14	2	2	school	Dirai(Ch	1	Shunamga	1	9	2	3	5	3	3	3	1	5	5	1	1	1	3	3	12	12	13	37	508	1	1	1	0	0	0	1	2	1	1	1	3	1	0	1	2	1	1	2	2	13
509	14	2	1	school	Dirai(Ch	1	Shunamga	1	9	2	3	0	3	1	3	1	1	1	0	1	0	1	0	5	3	6	14	509	1	0	0	0	0	1	1	0	0	1	1	1	1	1	1	1	1	0	1	1	26
510	15	2	2	school	Dirai(Ch	1	Shunamga	1	9	2	0	1	3	1	5	0	0	3	3	5	1	5	1	7	6	15	28	510	2	1	1	0	1	1	1	2	2	2	2	3	2	0	1	1	2	3	2	2	16
511	14	2	1	school	Dirai(Ch	1	Shunamga	1	10	2	0	5	0	1	3	0	0	0	3	3	1	3	0	4	8	7	19	511	1	3	0	0	3	0	0	0	0	3	1	2	0	0	3	0	3	1	3	3	12
512	15	2	2	school	Dirai(Ch	1	Shunamga	1	9	2	1	3	3	3	3	1	3	1	0	0	3	0	3	5	6	12	23	512	1	0	1	0	0	1	0	1	1	0	1	1	0	1	2	1	0	1	2	2	21
513	15	2	2	school	Dirai(Ch	1	Shunamga	1	10	2	0	5	0	1	3	3	5	1	5	5	3	5	0	7	18	11	36	513	1	0	0	0	0	0	3	0	1	0	2	3	2	0	1	2	0	1	3	2	10
514	15	2	1	school	Dirai(Ch	1	Shunamga	1	10	2	0	3	3	0	1	3	0	0	1	1	0	1	1	1	7	6	14	514	1	0	0	0	0	1	0	0	0	1	1	1	0	0	0	0	1	1	1	2	19
515	15	2	2	school	Dirai(Ch	1	Shunamga	1	10	2	3	3	0	3	0	1	5	3	1	1	3	5	3	10	10	11	31	515	1	1	2	0	0	2	0	0	1	2	1	2	1	1	1	0	1	0	1	2	14
516	15	2	1	school	Dirai(Ch	1	Shunamga	1	10	2	1	3	0	0	0	0	0	5	0	1	0	0	0	6	4	0	10	516	1	0	0	0	1	2	1	0	0	1	0	1	0	1	0	0	1	1	1	3	13
517	15	2	2	school	Dirai(Ch	1	Shunamga	1	10	2	3	3	0	0	3	1	0	1	3	1	0	3	3	7	5	9	21	517	1	0	1	0	0	0	1	1	1	0	1	1	1	0	1	0	1	1	0	2	25
518	14	2	1	school	Dirai(Ch	1	Shunamga	1	10	2	1	5	0	3	1	0	0	1	3	1	3	0	0	8	6	4	18	518	1	0	1	0	0	2	0	0	0	1	0	1	1	2	1	0	0	1	1	0	20
519	15	2	2	school	Dirai(Ch	1	Shunamga	1	10	2	1	3	0	3	0	1	0	5	3	0	1	5	3	12	4	9	25	519	1	0	1	1	2	1	2	3	0	0	1	1	2	1	2	0	2	1	1	3	26
520	14	2	1	school	Dirai(Ch	1	Shunamga	1	10	1	1	0	1	3	0	0	3	3	5	3	0	3	1	12	6	5	23	520	1	1	0	1	0	1	0	1	1	1	0	1	2	3	1	2	0	0	0	1	15
521	14	2	1	school	Dirai(Ch	1	Shunamga	1	10	2	1	3	5	1	5	3	0	0	3	5	1	0	0	8	5	11	24	521	1	0	0	1	1	3	1	0	0	2	2	1	3	1	0	0	1	0	2	1	11
522	15	2	2	school	Dirai(Ch	1	Shunamga	1	10	2	3	5	3	0	1	3	1	3	3	1	0	3	0	9	10	7	26	522	3	0	1	2	0	1	0	1	2	2	1	2	1	2	0	1	1	2	1	3	12
523	15	2	1	school	Dirai(Ch	1	Shunamga	1	10	2	3	1	5	3	3	5	5	3	1	3	5	0	3	10	14	16	40	523	1	0	0	1	0	0	0	0	0	2	1	3	1	0	0	0	1	2	0	0	30
524	15	2	2	school	Dirai(Ch	1	Shunamga	1	10	2	1	5	3	1	0	5	5	0	3	5	0	5	3	5	20	11	36	524	1	1	3	3	3	2	0	3	1	0	2	2	3	0	0	0	1	1	2	2	20
525	15	2	2	school	Dirai(Ch	1	Shunamga	1	10	2	0	0	3	1	0	1	3	1	3	1	0	3	0	5	5	6	0	525	1	1	0	2	0	1	1	0	1	0	1	2	1	1	0	1	2	1	3	1	13
526	16	2	2	school	Dirai(Ch	1	Shunamga	1	10	2	3	0	0	3	1	3	1	3	0	0	0	3	0	9	4	4	17	526	1	1	0	0	1	1	1	0	0	1	1	1	1	0	0	0	1	1	1	1	17
527	17	2	2	school	Dirai(Ch	1	Shunamga	1	10	2	3	1	1	0	1	1	1	3	3	1	1	1	3	9	4	7	20	527	1	0	1	1	1	1	0	1	1	1	1	1	1	0	1	1	1	1	1	1	13
528	15	2	2	school	Dirai(Ch	1	Shunamga	1	10	2	1	5	5	0	3	5	1	5	0	1	0	1	3	6	12	11	29	528	1	1	0	0	1	1	1	0	1	0	1	1	0	1	0	1	1	0	1	1	11
529	15	2	2	school	Dirai(Ch	1	Shunamga	1	10	2	3	5	1	0	5	5	0	5	0	5	0	3	0	8	15	9	32	529	1	0	1	0	0	1	0	1	1	0	0	1	0	0	1	0	0	1	1	2	23
530	13	2	2	school	Dirai(Ch	1	Shunamga	1	10	2	1	0	0	1	0	1	3	3	5	0	0	5	0	10	4	5	19	530	1	0	1	0	0	0	0	1	0	1	0	1	0	1	1	0	0	1	1	2	11
531	13	2	1	school	Dirai(Ch	1	Shunamga	1	8	2	0	0	0	1	3	1	5	1	3	1	3	5	0	5	7	8	20	531	0	1	0	1	0	0	1	0	0	1	0	0	1	0	0	1	0	0	3	2	9
532	13	2	1	school	Dirai(Ch	1	Shunamga	1	8	2	0	5	0	3	3	5	0	3	3	5	0	0	0	9	15	3	27	532	1	0	0	0	0	0	0	1	0	0	0	1	1	1	0	1	1	0	1	1	3
533	13	2	1	school	Dirai(Ch	1	Shunamga	3	8	2	3	3	3	1	1	5	5	3	1	5	1	1	3	8	18	9	35	533	1	1	1	0	1	1	1	1	1	1	1	3	2	0	1	1	1	1	3	2	17
534	13	2	1	school	Dirai(Ch	1	Shunamga	3	8	2	3	5	1	3	3	3	3	3	5	0	0	5	1	14	11	10	35	534	1	1	1	1	0	1	1	1	1	0	1	1	3	1	1	0	0	0	1	1	27
535	13	2	1	school	Dirai(Ch	1	Shunamga	3	8	2	3	5	0	3	0	3	1	3	1	3	5	3	5	10	12	13	35	535	1	1	0	1	2	3	0	1	1	3	1	2	3	1	1	2	0	1	1	2	18
536	13	2	1	school	Dirai(Ch	1	Shunamga	3	8	2	1	3	1	1	3	3	1	3	5	5	1	0	1	10	12	5	27	536	1	0	0	0	0	1	0	1	1	2	1	2	1	1	1	1	0	1	2	2	3
537	13	2	1	school	Dirai(Ch	1	Shunamga	1	8	2	1	0	0	3	0	0	0	3	1	5	0	0	0	8	5	0	13	537	1	0	0	0	0	0	0	0	0	0	0	0	0	0	1	0	0	0	0	1	13
538	13	2	1	school	Dirai(Ch	1	Shunamga	3	7	2	1	0	1	5	0	0	0	3	1	0	0	0	0	10	0	1	11	538	0	0	0	0	0	1	0	0	0	0	1	1	0	0	0	0	0	0	0	0	19
539	14	2	1	school	Dirai(Ch	1	Shunamga	3	4	2	0	3	1	3	1	3	1	3	0	3	3	3	0	6	10	8	24	539	1	0	1	0	1	1	0	1	1	1	1	1	1	3	1	1	0	2	1	1	10
540	13	2	1	school	Dirai(Ch	1	Shunamga	3	8	2	1	0	0	3	1	3	0	1	3	1	3	0	0	8	5	3	16	540	1	0	0	0	1	1	0	0	0	1	1	1	1	0	0	1	0	0	1	1	20
541	13	2	1	school	Dirai(Ch	1	Shunamga	3	8	2	1	3	5	0	1	5	5	3	3	0	1	1	1	7	13	9	29	541	1	2	0	0	0	1	2	0	0	3	0	2	2	2	0	0	2	2	1	0	8
542	13	2	1	school	Dirai(Ch	1	Shunamga	1	8	2	1	3	5	0	1	1	3	0	1	1	0	5	0	2	8	11	21	542	1	2	0	0	0	0	0	1	1	0	1	1	0	0	1	1	1	2	1	0	15
543	13	2	1	school	Dirai(Ch	1	Shunamga	1	8	2	1	0	0	1	0	1	0	3	0	0	0	1	0	8	9	14	31	543	1	1	0	0	0	1	0	1	1	1	0	0	1	1	1	1	2	0	1	2	11
544	14	2	1	school	Dirai(Ch	1	Shunamga	1	8	2	1	0	0	0	3	1	0	3	1	0	3	3	3	5	1	12	18	544	1	1	0	0	0	0	1	0	1	0	0	1	2	1	1	0	0	1	0	1	17
545	14	2	1	school	Dirai(Ch	1	Shunamga	3	8	1	0	1	1	3	1	0	0	1	3	1	0	3	3	7	2	8	17	545	1	0	0	3	0	0	0	1	1	1	0	0	2	1	0	0	1	0	2	2	21
546	15	2	1	school	Dirai(Ch	1	Shunamga	1	8	2	0	1	5	3	1	1	0	5	1	3	3	0	3	9	5	11	25	546	3	0	0	1	3	0	1	0	2	0	1	3	1	1	0	2	1	1	0	3	13
547	13	2	1	school	Dirai(Ch	1	Shunamga	3	8	2	0	0	1	0	0	0	0	3	0	0	0	0	0	3	0	1	4	547	0	1	0	0	0	0	0	1	0	0	0	2	0	3	0	1	0	0	0	0	42
548	13	2	1	school	Dirai(Ch	1	Shunamga	1	8	2	0	3	0	0	0	3	5	5	1	0	0	0	0	6	11	0	17	548	0	1	0	0	0	1	0	0	0	3	1	1	1	1	1	0	1	1	2	3	14
549	14	2	1	school	Dirai(Ch	1	Shunamga	3	8	1	3	0	1	3	3	1	1	3	3	3	0	0	3	12	5	7	24	549	1	1	0	0	1	0	1	1	1	1	1	1	2	0	2	1	1	2	2	2	14
550	13	2	1	school	Dirai(Ch	1	Shunamga	3	8	2	5	5	5	5	1	0	0	5	5	0	0	1	3	20	5	10	35	550	3	1	1	0	2	3	3	2	1	3	2	2	2	3	1	2	3	3	2	3	11
551	13	2	2	school	Dirai(Ch	1	Shunamga	1	8	2	1	5	1	3	0	1	3	1	3	0	1	0	1	8	9	3	20	551	1	0	0	1	0	1	1	0	1	1	0	1	0	1	0	1	0	2	1	2	16
552	12	1	2	school	Dirai(Ch	1	Shunamga	1	7	2	1	5	0	0	1	0	5	3	1	5	0	0	0	5	15	1	21	552	1	2	0	0	1	0	0	1	0	2	0	1	2	0	0	2	0	1	2	1	15
553	13	2	2	school	Dirai(Ch	1	Shunamga	1	7	2	3	1	1	5	3	0	1	3	0	3	0	3	3	11	5	10	26	553	1	1	1	1	0	1	0	1	0	1	1	1	0	1	2	0	0	0	0	3	20
554	12	1	2	school	Dirai(Ch	1	Shunamga	1	8	2	1	0	1	3	5	3	1	1	3	0	0	1	0	8	4	7	19	554	1	1	0	0	0	0	1	1	2	0	3	1	2	0	0	1	0	1	3	3	11
555	13	2	2	school	Dirai(Ch	1	Shunamga	1	8	2	3	0	0	1	0	0	0	5	1	0	0	1	0	10	0	1	11	555	1	1	0	0	0	0	1	0	1	0	1	0	0	1	1	1	1	1	0	1	18
556	15	2	2	school	Dirai(Ch	1	Shunamga	1	8	2	0	5	0	5	5	0	3	1	0	5	3	1	3	6	13	12	31	556	1	0	0	0	0	1	0	1	1	0	1	1	1	0	1	0	1	1	1	2	15
557	15	2	2	school	Dirai(Ch	1	Shunamga	1	8	2	3	5	0	0	3	0	0	5	0	1	1	0	1	8	6	4	18	557	1	1	0	0	1	1	2	1	1	0	1	1	0	1	0	0	1	0	1	2	7
558	13	2	2	school	Dirai(Ch	1	Shunamga	1	8	2	0	3	0	3	0	1	0	0	1	0	1	3	0	4	4	4	12	558	3	1	0	1	0	1	1	1	0	1	1	1	1	1	0	1	1	1	1	1	17
559	14	2	2	school	Dirai(Ch	1	Shunamga	1	7	2	0	3	1	1	1	3	1	1	3	5	3	0	0	5	12	5	22	559	1	1	1	0	0	0	1	2	1	0	1	2	2	0	1	1	0	1	1	1	18
560	14	2	2	school	Dirai(Ch	1	Shunamga	1	8	2	0	1	1	3	1	5	3	1	5	3	0	0	1	5	12	3	20	560	1	0	1	0	1	1	1	1	0	1	1	2	3	1	1	0	0	1	1	1	14
561	14	2	2	school	Dirai(Ch	1	Shunamga	1	8	2	3	0	0	1	0	1	0	0	3	0	1	1	0	7	1	2	10	561	1	0	1	0	0	1	1	2	0	1	0	1	0	3	0	0	1	1	0	1	10
562	13	2	2	school	Dirai(Ch	1	Shunamga	1	8	2	0	5	0	1	5	0	3	0	0	5	0	0	0	1	13	5	19	562	0	1	0	0	0	0	0	1	1	0	0	2	1	0	1	0	0	1	1	1	4
563	13	2	2	school	Dirai(Ch	1	Shunamga	1	8	2	0	0	0	0	0	1	5	0	0	0	0	3	0	0	6	3	9	563	0	0	0	0	0	0	0	1	0	0	0	1	0	0	1	0	1	0	0	0	16
564	14	2	2	school	Dirai(Ch	1	Shunamga	1	8	2	0	0	0	3	3	1	0	3	3	0	0	0	0	9	1	3	13	564	1	1	0	0	0	0	1	0	1	1	1	1	2	0	0	1	1	1	2	2	12
565	13	2	2	school	Dirai(Ch	1	Shunamga	1	8	2	0	5	1	0	3	3	1	5	0	5	0	0	1	5	14	4	23	565	1	1	0	0	0	0	2	0	1	0	1	1	1	0	0	0	1	0	0	3	23
566	13	2	2	school	Dirai(Ch	1	Shunamga	1	8	2	0	1	1	0	3	3	1	5	0	1	3	0	5	5	6	12	23	566	1	1	0	0	1	2	0	3	1	2	1	2	0	0	1	2	0	1	2	3	23
567	13	2	2	school	Dirai(Ch	1	Shunamga	1	8	2	0	1	1	0	3	3	1	0	0	1	3	0	5	0	6	12	18	567	1	1	0	0	1	2	0	2	1	2	2	2	0	0	1	2	0	1	2	3	19
568	13	2	2	school	Dirai(Ch	1	Shunamga	1	8	2	3	5	0	1	0	1	5	1	3	0	0	3	0	8	11	3	22	568	0	1	0	1	3	1	2	0	1	0	2	1	2	0	1	0	1	0	3	0	23
569	13	2	2	school	Dirai(Ch	1	Shunamga	1	8	2	0	1	0	0	0	1	3	5	1	0	3	0	3	6	5	6	17	569	0	1	0	1	1	2	0	1	1	2	0	1	2	1	2	1	0	1	3	3	10
570	13	2	2	school	Dirai(Ch	1	Shunamga	1	8	2	3	5	0	0	3	5	0	3	1	5	0	3	0	7	15	6	28	570	0	0	1	0	0	0	0	1	0	0	0	1	1	0	0	0	0	1	2	3	23
571	13	2	2	school	Dirai(Ch	1	Shunamga	1	8	2	0	0	1	3	5	0	0	5	3	0	0	5	0	11	0	11	22	571	0	1	0	1	0	1	0	3	0	2	3	2	0	2	1	3	1	0	0	3	10
572	13	2	2	school	Dirai(Ch	1	Shunamga	1	8	2	0	1	3	1	0	3	1	3	1	5	1	0	1	5	10	5	20	572	0	0	0	0	0	0	1	1	1	0	1	1	1	0	0	1	1	0	1	1	24
573	12	1	2	school	Dirai(Ch	1	Shunamga	1	8	2	0	3	1	3	0	5	3	1	3	1	0	5	1	7	12	7	26	573	0	1	0	0	1	0	3	1	0	1	2	3	0	3	2	1	3	1	1	1	26
574	13	2	2	school	Dirai(Ch	1	Shunamga	1	8	2	3	5	0	1	0	1	5	1	3	5	0	1	0	8	16	1	25	574	0	1	0	3	1	3	0	1	0	2	3	2	1	0	2	3	1	2	0	1	18
575	13	2	2	school	Dirai(Ch	1	Shunamga	1	8	2	1	0	5	3	3	1	0	3	1	1	0	3	0	8	2	11	21	575	0	1	0	3	0	0	0	1	0	1	0	2	1	0	2	3	1	2	0	1	21
576	14	2	2	school	Dirai(Ch	1	Shunamga	1	8	1	1	3	0	3	1	3	0	1	3	0	0	3	3	8	6	7	21	576	1	1	0	2	0	0	1	1	1	3	1	0	0	0	0	0	1	0	0	3	22
577	12	1	2	school	Dirai(Ch	1	Shunamga	1	8	2	0	3	1	3	5	0	5	3	0	3	0	5	1	6	11	12	29	577	0	1	0	2	1	1	0	2	0	2	3	0	1	0	2	1	0	2	3	0	4
578	13	2	2	school	Dirai(Ch	1	Shunamga	1	8	2	0	0	0	0	1	0	1	3	0	1	0	0	0	3	2	1	6	578	0	0	0	0	0	0	0	1	0	0	1	0	1	0	0	0	0	0	1	0	13
579	9	1	1	support_	ASK (Pur	2	Dhaka	3	8	1	3	5	0	1	0	1	1	5	0	5	0	0	0	9	12	0	21	579	1	0	0	0	0	0	0	1	0	2	1	2	0	1	2	1	0	1	0	0	16
580	10	1	1	support_	ASK (Pur	2	Dhaka	3	4	1	1	0	1	1	0	5	1	3	0	0	0	0	1	5	5	2	12	580	0	1	1	0	1	1	0	1	0	1	1	1	1	2	1	0	1	1	2	0	20
581	11	1	1	support_	ASK (Pur	2	Dhaka	3	3	1	3	0	0	3	3	5	0	5	1	0	3	5	1	12	5	12	29	581	0	1	2	1	0	1	0	2	1	1	1	0	2	1	3	0	1	0	1	2	10
582	11	1	1	support_	ASK (Pur	2	Dhaka	3	4	1	1	0	0	3	0	1	0	3	0	5	3	3	1	7	6	7	20	582	0	1	1	0	0	0	0	1	0	0	1	1	1	1	0	1	0	0	1	1	15
583	13	2	2	support_	ASK (Pur	2	Dhaka	3	4	1	0	3	0	1	0	3	1	3	0	1	5	1	1	4	8	7	19	583	0	1	2	1	0	1	2	3	0	0	1	3	0	1	1	2	1	1	0	1	20
584	11	1	1	support_	ASK (Pur	2	Dhaka	3	3	1	3	0	0	0	5	5	5	0	0	5	0	3	0	3	15	8	26	584	0	1	1	0	0	2	1	1	0	2	0	1	0	1	1	0	2	1	1	0	25
585	10	1	2	support_	ASK (Pur	2	Dhaka	3	2	1	0	3	0	3	3	3	3	3	1	1	1	3	0	7	10	7	24	585	0	1	2	2	0	2	0	3	0	0	2	2	0	2	2	2	1	2	0	2	1
586	13	2	2	support_	ASK (Pur	2	Dhaka	3	3	1	0	5	1	3	0	0	5	0	0	5	1	5	0	3	15	7	25	586	2	3	0	0	0	0	1	0	0	1	0	1	0	0	2	1	3	0	3	3	15
587	11	1	1	support_	ASK (Pur	2	Dhaka	3	7	1	1	5	0	0	0	0	0	0	0	5	0	1	0	0	10	1	11	587	0	0	0	0	0	0	0	0	0	0	0	0	0	1	0	0	0	0	0	0	23
588	9	1	1	support_	ASK (Pur	2	Dhaka	3	4	1	1	3	0	3	3	0	1	1	0	0	0	3	0	5	4	6	15	588	0	1	1	2	0	2	0	3	0	2	2	0	0	2	2	2	0	0	2	2	9
589	11	1	2	support_	ASK (Pur	2	Dhaka	3	2	1	3	5	3	1	3	0	3	0	0	5	0	3	0	4	13	9	26	589	0	1	1	0	0	0	0	1	0	1	0	1	0	0	1	0	1	0	1	1	6
590	12	1	2	support_	ASK (Pur	2	Dhaka	3	3	1	3	0	1	1	1	5	0	3	0	1	5	1	0	7	6	8	21	590	1	1	1	0	0	1	2	3	0	1	1	1	0	0	1	0	1	0	1	0	17
591	12	1	2	support_	ASK (Pur	2	Dhaka	3	4	1	0	3	0	1	3	0	0	3	1	5	0	0	5	5	8	8	21	591	0	0	1	0	2	0	0	3	0	1	2	0	0	0	2	0	3	1	0	2	29
592	11	1	2	support_	ASK (Pur	2	Dhaka	3	4	1	3	5	0	0	1	5	0	1	0	3	0	5	0	4	13	6	23	592	1	0	0	0	1	0	0	1	0	0	0	1	0	0	0	0	0	0	1	1	24
593	14	2	2	support_	ASK (Pur	2	Dhaka	3	4	1	0	0	0	3	0	3	1	3	3	1	0	3	0	9	5	3	17	593	0	2	2	1	0	2	2	2	0	2	2	2	0	2	2	2	2	2	0	2	17
594	11	1	2	support_	ASK (Pur	2	Dhaka	3	1	1	0	3	0	3	3	1	1	3	0	1	3	3	0	6	6	9	21	594	1	1	2	2	1	2	3	0	0	0	1	0	0	2	2	2	1	2	0	2	24
595	10	1	2	support_	ASK (Gor	2	Dhaka	3	2	1	1	5	5	0	0	0	0	5	3	3	0	0	0	9	8	5	22	595	2	1	0	3	1	0	1	3	0	0	1	1	0	0	3	1	2	1	1	3	18
596	13	2	2	support_	ASK (Gor	2	Dhaka	3	5	1	5	3	1	3	3	1	0	3	1	1	3	1	3	12	5	11	28	596	2	0	0	0	1	2	1	1	0	0	0	1	0	1	1	1	2	2	1	1	10
597	12	1	2	support_	ASK (Gor	2	Dhaka	3	7	2	1	3	5	0	5	5	1	1	3	1	3	5	0	5	10	18	33	597	1	0	2	1	1	0	1	1	0	1	0	2	3	0	3	1	1	0	1	2	19
598	12	1	2	support_	ASK (Gor	2	Dhaka	3	5	1	3	5	1	3	3	1	0	5	3	0	0	0	0	14	6	4	24	598	1	0	0	0	0	1	0	1	0	0	1	1	1	0	0	0	0	1	2	1	12
599	13	2	2	support_	ASK (Gor	2	Dhaka	3	5	1	3	5	3	1	3	0	1	3	5	0	3	5	5	12	6	19	37	599	1	2	1	0	0	1	1	0	0	0	1	1	0	0	1	0	0	1	1	1	25
600	11	1	1	support_	ASK (Gor	2	Dhaka	3	5	1	5	3	3	1	1	5	3	5	1	5	3	1	5	12	16	13	41	600	1	0	1	0	0	0	1	1	3	1	0	2	3	2	1	0	0	1	0	1	19
601	11	1	1	support_	ASK (Gor	2	Dhaka	3	4	1	5	0	1	5	0	0	0	5	1	3	1	0	5	16	3	7	26	601	2	0	2	1	0	0	1	2	1	2	0	2	0	1	0	2	0	1	0	2	16
602	11	1	1	support_	ASK (Gor	2	Dhaka	3	3	1	0	3	1	3	0	1	5	0	0	1	0	1	0	3	10	2	15	602	2	2	0	0	0	0	2	2	0	0	1	1	0	1	0	1	0	1	1	2	8
603	11	1	2	support_	ASK (Gor	2	Dhaka	3	4	1	0	3	0	3	3	1	5	3	0	3	0	0	0	6	12	3	21	603	0	1	0	0	0	0	0	0	0	0	2	2	0	0	0	2	1	0	0	0	19
604	12	1	2	support_	ASK (Gor	2	Dhaka	3	2	1	0	0	0	5	5	0	0	0	0	5	5	5	0	5	5	15	25	604	0	3	1	1	3	1	1	1	1	1	1	0	1	1	3	0	1	1	3	1	25
605	11	1	2	support_	ASK (Gor	2	Dhaka	3	3	1	0	3	3	3	0	1	5	3	0	1	0	3	0	6	10	6	22	605	2	2	0	2	0	2	2	3	0	0	1	1	1	1	0	0	1	0	1	0	21
606	12	1	2	support_	ASK (Gor	2	Dhaka	3	4	1	3	5	0	3	0	3	5	3	3	5	3	3	1	12	18	7	37	606	1	0	1	0	0	0	0	2	0	3	2	1	1	2	1	1	2	3	2	3	11
607	13	2	2	support_	ASK (Gor	2	Dhaka	3	4	1	3	5	0	3	5	3	0	5	0	0	3	1	0	11	8	9	28	607	1	0	1	0	0	1	0	1	0	1	0	1	0	0	1	0	1	1	0	2	24
608	12	1	2	support_	ASK (Gor	2	Dhaka	3	6	1	3	5	0	1	3	3	5	1	0	0	3	1	0	5	13	9	27	608	2	1	3	2	0	0	1	2	0	0	0	1	0	1	1	2	3	2	0	3	18
609	9	1	1	support_	ASK (Gor	2	Dhaka	3	5	1	0	3	0	3	0	3	5	0	0	1	0	1	0	3	12	1	16	609	3	2	0	1	0	0	0	1	2	1	2	1	0	2	0	2	1	0	2	1	9
610	12	1	2	support_	ASK(Basa	2	Dhaka	3	2	1	0	1	3	0	5	5	1	0	3	5	5	3	3	3	12	19	34	610	0	2	3	0	0	0	0	3	3	0	0	1	3	0	0	0	0	1	0	2	23
611	12	1	2	support_	ASK(Basa	2	Dhaka	3	4	1	1	3	5	3	1	1	0	0	1	0	3	1	3	5	4	13	22	611	0	2	1	0	3	1	2	1	0	2	0	1	0	2	3	1	0	1	0	3	22
612	13	2	2	support_	ASK(Basa	2	Dhaka	1	3	1	0	5	0	1	3	0	3	3	1	3	5	1	0	5	11	9	25	612	1	0	1	0	3	1	1	0	2	0	1	0	0	0	1	0	1	0	1	3	15
613	13	2	2	support_	ASK(Basa	2	Dhaka	1	3	1	1	5	3	3	1	3	0	3	3	1	3	1	1	10	9	9	28	613	1	1	1	1	0	1	0	1	0	1	1	0	1	2	0	0	0	1	1	2	5
614	10	1	2	support_	ASK(Basa	2	Dhaka	1	7	1	1	5	3	3	3	3	3	3	1	3	0	1	3	8	14	10	32	614	1	1	1	0	0	1	0	0	0	1	1	1	1	2	0	0	0	1	1	2	33
615	11	1	2	support_	ASK(Basa	2	Dhaka	3	4	1	1	1	1	1	1	0	0	3	1	1	1	1	0	6	2	4	12	615	1	1	0	1	1	1	1	1	0	0	0	1	0	0	0	0	0	0	0	1	15
616	11	1	2	support_	ASK(Basa	2	Dhaka	1	3	1	3	5	3	1	1	3	0	3	3	0	3	0	0	10	8	7	25	616	1	1	0	3	0	1	0	3	2	3	3	0	3	2	0	1	1	3	3	3	27
617	11	1	2	support_	ASK(Basa	2	Dhaka	1	5	1	3	5	3	3	1	0	0	5	3	1	3	1	3	14	6	11	31	617	1	2	1	1	1	3	0	1	2	2	1	3	2	1	1	0	2	0	0	3	20
618	11	1	2	support_	ASK(Basa	2	Dhaka	1	3	1	1	5	1	1	1	5	5	1	1	5	1	3	1	4	20	7	31	618	1	0	1	0	1	1	0	3	1	1	0	1	1	1	1	1	1	1	1	3	40
619	11	1	2	support_	ASK(Basa	2	Dhaka	1	6	1	1	1	1	1	1	0	3	1	1	1	1	1	0	4	5	4	13	619	3	1	1	1	1	1	1	3	3	3	1	3	1	3	3	3	1	1	3	3	25
620	11	1	2	support_	ASK(Basa	2	Dhaka	3	4	1	1	5	0	3	3	1	3	1	3	3	3	0	0	8	14	6	28	620	0	0	0	0	0	1	1	3	1	0	0	3	1	0	1	0	0	3	0	1	15
621	16	2	2	support_	ASK(Basa	2	Dhaka	3	3	1	5	5	5	5	5	5	5	5	5	5	0	3	5	20	20	18	58	621	3	2	1	2	0	2	2	2	0	2	0	2	1	2	1	0	1	2	1	2	27
622	12	1	2	support_	ASK(Basa	2	Dhaka	3	5	1	3	5	1	3	1	1	5	3	3	5	3	1	0	12	16	6	34	622	1	2	2	0	0	1	3	2	1	0	0	1	2	1	1	0	1	1	1	2	5
623	12	1	2	support_	ASK(Basa	2	Dhaka	3	6	1	3	3	0	3	1	1	3	1	1	3	1	3	1	8	10	6	24	623	1	0	0	0	0	0	0	1	0	0	0	1	0	0	0	0	1	0	0	1	35
624	10	1	2	support_	ASK(Basa	2	Dhaka	3	6	1	3	1	1	3	3	0	1	3	1	3	1	1	3	10	5	11	26	624	1	3	0	0	2	0	0	2	0	1	0	2	0	2	0	0	0	0	0	2	13
625	10	1	2	support_	ASK(Basa	2	Dhaka	3	1	1	0	0	5	0	1	3	5	0	5	0	0	0	1	5	8	1	14	625	0	0	1	0	0	0	0	1	1	2	0	1	2	0	1	0	1	1	1	1	15
626	11	1	1	support_	ASK(Basa	2	Dhaka	3	3	1	3	0	1	0	0	1	5	3	5	0	3	5	0	16	6	9	31	626	0	0	0	2	0	0	1	0	2	0	0	0	3	2	0	2	0	1	2	0	41
627	10	1	2	support_	ASK(Basa	2	Dhaka	3	5	1	0	3	0	3	0	5	0	5	3	5	1	5	5	11	13	11	35	627	0	1	1	1	2	3	3	3	1	3	1	3	3	3	2	2	1	2	3	3	17
628	10	1	2	support_	ASK(Basa	2	Dhaka	2	1	1	3	3	3	3	1	3	1	3	1	3	3	1	3	10	10	11	31	628	2	1	2	2	2	1	2	2	1	2	2	1	2	2	1	2	1	2	0	2	37
629	10	1	2	support_	ASK(Basa	2	Dhaka	1	0	1	0	0	3	0	3	3	5	0	0	5	0	3	3	6	13	12	31	629	3	1	1	1	1	3	1	2	1	3	1	1	0	1	0	0	0	1	3	1	12
630	11	1	2	support_	ASK(Basa	2	Dhaka	3	3	1	1	1	5	0	5	3	0	1	1	3	3	1	3	3	7	17	27	630	0	0	1	0	3	0	0	2	2	2	1	0	1	0	0	0	2	1	0	2	20
631	13	2	1	support_	ASK(Basa	2	Dhaka	3	2	1	3	0	3	0	1	3	0	3	5	0	0	5	3	11	3	12	26	631	3	0	0	3	0	2	3	1	0	2	2	0	3	3	3	2	2	2	3	1	27
632	10	1	1	support_	ASK(Basa	2	Dhaka	3	3	1	1	5	5	1	0	1	3	1	3	1	0	0	3	6	10	8	24	632	1	1	1	1	1	1	1	1	1	1	1	1	1	1	1	1	1	1	1	1	14
633	12	1	1	support_	ASK(Basa	2	Dhaka	3	2	1	1	5	0	1	5	3	0	5	3	0	3	3	1	10	8	12	30	633	1	0	1	1	2	2	2	3	3	1	2	0	1	2	0	1	2	1	1	1	17
634	10	1	1	support_	ASK(Basa	2	Dhaka	2	5	1	3	3	3	3	3	0	3	3	3	3	3	3	5	12	9	17	38	634	2	2	2	2	2	2	2	2	2	2	0	0	0	3	3	2	3	2	2	2	34
635	13	2	1	support_	ASK(Basa	2	Dhaka	2	0	1	3	0	5	5	0	5	5	5	0	5	0	1	0	13	15	6	34	635	1	1	0	0	0	0	1	1	0	3	1	1	0	0	0	0	0	1	0	3	33
636	13	2	2	support_	ASK(Basa	2	Dhaka	3	0	1	1	5	1	5	0	1	0	0	1	0	0	1	0	7	6	2	15	636	1	1	0	0	0	0	1	1	0	3	1	0	2	0	0	1	2	3	0	1	26
637	10	1	1	support_	ASK(Basa	2	Dhaka	3	2	1	3	5	5	1	0	1	3	1	3	1	0	1	0	8	10	6	24	637	1	0	0	0	0	2	1	3	0	1	0	1	1	0	1	0	2	1	0	0	29
638	13	2	1	support_	ASK(Basa	2	Dhaka	3	4	1	0	1	5	0	0	0	1	3	3	5	5	0	0	6	7	10	23	638	1	1	1	0	2	2	0	2	2	2	3	0	3	1	2	0	1	3	0	0	34
639	12	1	1	support_	ASK(Basa	2	Dhaka	1	4	1	3	0	0	5	1	3	3	3	1	1	0	1	0	12	7	2	21	639	0	0	1	0	0	0	0	0	0	0	0	0	2	0	0	0	0	0	1	1	7
640	12	1	1	support_	ASK(Basa	2	Dhaka	3	5	1	5	0	1	1	5	5	1	5	0	5	1	5	5	11	11	17	39	640	0	2	2	0	2	1	3	3	3	2	3	0	1	3	0	3	1	2	3	0	31
641	11	1	2	support_	ASK(Basa	2	Dhaka	3	1	1	0	3	0	0	5	0	3	5	1	0	3	5	1	6	6	13	25	641	2	1	0	1	3	0	2	0	3	2	3	0	2	0	3	1	2	0	3	1	21
642	10	1	2	support_	ASK(Basa	2	Dhaka	2	2	1	0	1	0	3	0	5	0	5	3	1	3	5	1	11	9	9	29	642	2	1	2	3	2	3	3	3	0	0	2	2	0	2	1	3	1	0	3	1	25
643	10	1	2	support_	ASK(Basa	2	Dhaka	3	0	1	1	5	1	5	0	1	5	3	1	5	0	1	0	10	16	2	28	643	1	2	0	0	1	2	1	1	0	3	0	1	2	0	1	0	2	3	0	1	15
644	10	1	2	support_	ASK(Basa	2	Dhaka	3	2	1	0	5	1	0	0	1	0	0	0	0	5	0	0	0	6	6	12	644	0	3	3	0	0	2	0	1	3	0	1	0	0	0	0	0	1	0	0	1	28
645	13	2	2	support_	ASK(Basa	2	Dhaka	3	3	1	3	1	3	5	1	5	0	5	1	0	3	0	1	14	6	8	28	645	0	1	2	3	0	2	1	2	3	2	1	2	3	2	0	1	0	1	2	3	21
646	12	1	2	support_	ASK(Basa	2	Dhaka	3	4	1	3	1	5	1	3	1	1	1	5	3	5	1	1	10	6	15	31	646	1	2	0	0	0	0	2	1	2	2	0	2	3	0	0	1	2	2	0	1	33
647	12	1	1	support_	ASK(Basa	2	Dhaka	2	4	1	0	0	1	3	1	1	1	3	0	1	1	3	1	6	3	7	16	647	1	1	3	1	3	2	0	0	3	3	1	3	2	0	1	0	3	3	0	3	11
648	9	1	2	support_	ASK ( Mi	2	Dhaka	3	0	1	3	1	0	1	3	5	3	3	1	0	5	3	1	8	9	12	29	648	2	1	2	1	2	1	1	2	1	1	2	3	1	0	1	0	1	1	3	2	26
649	11	1	2	support_	ASK ( Mi	2	Dhaka	3	2	1	1	3	0	1	3	5	1	0	3	5	5	1	3	5	14	12	31	649	1	0	2	0	1	2	1	0	3	1	3	2	1	0	2	0	3	1	0	3	25
650	9	1	2	support_	ASK ( Mi	2	Dhaka	3	2	1	0	5	3	0	1	0	5	3	3	1	5	3	3	6	11	15	32	650	1	2	0	1	0	1	0	2	1	2	3	1	0	2	3	0	2	3	0	1	25
651	10	1	1	support_	ASK ( Mi	2	Dhaka	3	2	1	3	5	3	1	3	3	0	3	3	3	5	5	1	10	11	17	38	651	1	1	1	0	1	1	1	3	0	3	1	2	3	1	1	1	1	1	1	1	24
652	13	2	1	support_	ASK ( Mi	2	Dhaka	3	0	1	5	5	3	5	5	3	5	3	5	5	5	5	5	18	18	23	59	652	3	1	2	1	0	3	1	3	1	2	1	3	2	0	1	1	2	3	2	1	16
653	9	1	2	support_	ASK ( Mi	2	Dhaka	3	9	1	0	5	0	3	5	5	5	3	1	3	5	3	0	7	18	13	38	653	0	1	2	0	2	0	0	2	1	3	2	2	1	0	1	0	1	1	2	3	19
654	14	2	1	support_	ASK ( Mi	2	Dhaka	3	3	1	0	3	3	0	3	3	3	3	3	3	3	3	3	6	12	15	33	654	3	1	1	2	1	1	1	2	0	2	0	1	0	1	0	0	0	0	0	0	16
655	11	1	2	support_	ASK ( Mi	2	Dhaka	3	1	1	1	5	0	1	3	5	5	3	3	5	0	3	5	8	20	11	39	655	0	1	2	0	2	1	1	0	1	0	1	2	1	0	1	0	1	1	2	2	21
656	9	1	2	support_	ASK ( Mi	2	Dhaka	3	4	1	0	0	0	5	3	5	3	5	5	5	3	1	0	15	13	7	35	656	1	2	0	2	0	0	1	3	0	1	0	1	0	2	3	0	0	1	2	2	32
657	10	1	1	support_	ASK ( Mi	2	Dhaka	3	1	1	0	0	0	0	0	0	0	0	0	0	0	0	0	0	0	0	0	657	1	1	2	1	0	1	1	2	1	1	3	0	3	3	1	3	1	2	2	3	23
658	10	1	1	support_	ASK ( Mi	2	Dhaka	3	1	1	0	5	3	0	1	0	5	3	0	5	5	3	3	3	11	15	29	658	1	1	0	1	0	1	0	1	1	1	1	3	1	3	1	0	1	3	2	1	27
659	9	1	2	support_	ASK ( Mi	2	Dhaka	3	1	1	0	0	0	0	0	0	0	0	0	0	0	0	0	0	0	0	0	659	1	1	2	2	1	2	2	3	1	3	1	1	0	1	1	1	1	1	1	1	23
660	10	1	2	support_	ASK ( Mi	2	Dhaka	3	1	1	0	1	0	3	1	0	1	3	0	5	3	1	0	6	7	5	18	660	1	2	1	0	0	1	2	0	1	2	0	3	1	0	1	3	0	2	1	2	25
661	11	1	2	support_	ASK ( Mi	2	Dhaka	3	4	1	1	5	0	3	1	5	5	5	3	5	3	3	5	12	20	12	44	661	2	1	2	0	2	2	0	0	1	1	2	2	2	0	1	1	2	2	2	0	21
662	10	1	1	support_	ASK ( Mi	2	Dhaka	3	4	1	3	5	0	3	1	1	5	1	3	5	0	0	0	10	16	1	27	662	0	3	0	0	0	0	2	3	0	3	2	2	0	0	0	0	0	3	0	3	22
663	12	1	2	support_	ASK ( Mi	2	Dhaka	3	1	1	5	0	0	1	1	5	5	3	0	5	5	5	0	9	15	11	35	663	0	0	1	0	1	3	0	0	0	1	0	2	0	0	0	0	1	1	3	3	25
664	10	1	1	support_	ASK ( Mi	2	Dhaka	3	1	1	1	5	0	3	1	1	5	0	0	5	0	5	5	4	16	11	31	664	1	1	0	3	0	3	2	1	0	3	2	2	0	0	0	1	0	3	0	0	27
665	11	1	1	support_	ASK ( Mi	2	Dhaka	3	1	1	5	5	5	5	1	5	5	5	5	1	5	5	5	20	16	21	57	665	1	3	0	0	0	1	2	2	2	2	2	2	1	0	0	2	2	2	1	2	34
666	11	1	1	support_	ASK ( Mi	2	Dhaka	3	3	1	5	1	3	5	1	1	5	5	5	5	5	5	1	20	12	15	47	666	3	1	1	0	3	3	0	0	1	3	2	2	2	3	3	2	3	2	0	0	16
667	15	2	1	support_	ASK ( Mi	2	Dhaka	2	3	1	1	0	5	1	1	1	5	5	3	5	3	0	3	10	11	12	33	667	1	3	3	2	0	3	0	0	0	2	1	1	3	2	1	1	0	1	1	0	13
668	11	1	1	support_	ASK ( Mi	2	Dhaka	2	0	1	5	0	0	5	5	5	0	5	1	0	5	3	3	16	5	16	37	668	1	2	2	0	1	1	1	1	2	1	1	2	1	2	1	2	1	0	1	2	9
669	10	1	2	support_	ASK ( Mi	2	Dhaka	3	0	1	0	5	0	0	3	3	5	0	0	5	0	0	3	0	11	6	17	669	0	2	0	0	0	0	0	2	0	2	0	3	0	0	0	1	0	3	0	3	23
670	10	1	1	support_	ASK ( Mi	2	Dhaka	3	1	1	5	0	5	0	1	5	3	1	1	3	3	1	0	7	11	10	28	670	3	1	1	0	1	1	0	3	0	1	2	1	0	1	0	1	0	1	3	3	29
671	9	1	1	support_	ASK ( Mi	2	Dhaka	3	3	1	5	0	3	3	1	1	0	5	3	0	3	1	1	16	1	9	26	671	1	2	0	0	1	1	1	1	2	2	3	1	2	2	1	2	1	2	1	3	15
672	9	1	1	support_	ASK ( Mi	2	Dhaka	3	2	1	3	5	0	0	0	0	0	5	3	0	3	5	5	11	5	13	29	672	1	2	0	0	0	0	1	3	1	2	0	1	0	0	1	0	0	1	1	1	29
673	15	2	1	support_	ASK ( Mi	2	Dhaka	3	2	1	1	5	3	1	1	5	3	3	5	3	3	0	3	10	16	10	36	673	2	1	1	0	1	1	2	3	1	1	2	2	1	1	1	1	1	1	2	2	32
674	10	1	1	support_	ASK ( Mi	2	Dhaka	3	5	1	0	0	5	0	0	0	0	1	5	1	5	5	0	6	1	15	22	674	2	0	0	3	0	0	1	1	3	1	3	0	3	3	0	3	0	3	0	3	15
675	9	1	1	support_	ASK ( Mi	2	Dhaka	3	4	1	5	0	0	0	3	0	3	3	0	5	0	0	0	8	8	3	19	675	0	1	0	0	0	1	2	1	0	1	0	1	0	1	1	0	0	3	0	3	13
676	10	1	2	support_	ASK ( Mi	2	Dhaka	3	1	1	5	1	0	1	3	3	0	3	3	3	5	3	3	12	7	14	33	676	0	2	1	0	1	2	0	3	2	0	1	1	0	0	0	0	0	0	0	0	16
677	12	1	2	support_	ASK (Mir	2	Dhaka	3	3	1	5	0	0	3	1	5	0	0	3	3	5	5	0	11	8	11	30	677	0	0	3	0	0	3	3	2	0	1	0	0	3	0	3	0	2	2	0	3	17
678	13	2	1	support_	ASK (Kal	2	Dhaka	3	1	1	3	0	0	3	0	0	0	1	3	0	1	1	0	12	0	2	14	678	0	1	2	0	0	3	1	1	0	0	1	0	3	1	0	1	2	0	0	1	47
679	16	2	2	support_	ASK (Kal	2	Dhaka	3	4	1	0	5	0	3	0	5	5	5	0	5	3	5	3	8	20	11	39	679	3	3	2	2	0	2	0	0	0	2	2	3	0	3	3	3	2	0	0	2	47
680	11	1	1	support_	ASK (Kal	2	Dhaka	1	1	1	3	0	0	3	1	1	3	1	5	1	0	1	0	12	5	2	19	680	1	0	1	0	0	0	0	2	2	0	0	0	0	0	1	1	2	2	0	0	16
681	9	1	2	support_	ASK (Kal	2	Dhaka	3	4	1	5	0	0	3	1	1	0	5	3	0	3	3	3	16	1	10	27	681	0	2	2	0	0	0	0	2	0	0	1	0	3	1	2	1	2	0	0	0	14
682	9	1	2	support_	ASK (Kal	2	Dhaka	1	4	1	5	5	0	3	1	1	0	5	3	0	3	5	0	16	1	9	26	682	0	2	2	2	0	0	0	1	0	1	1	1	0	1	1	0	1	0	1	2	19
683	9	1	2	support_	ASK (Kal	2	Dhaka	1	4	1	5	5	3	3	1	1	0	3	3	0	3	3	3	14	6	13	33	683	0	2	3	2	0	0	0	1	0	2	0	1	1	1	1	1	1	1	1	1	54
684	11	1	1	support_	ASK (Kal	2	Dhaka	3	4	1	0	3	0	1	1	1	5	3	1	0	0	3	0	5	9	4	18	684	1	0	0	2	2	1	0	0	0	1	1	1	0	1	0	0	0	1	1	2	43
685	10	1	2	support_	ASK (Kal	2	Dhaka	3	3	1	3	3	0	3	3	3	3	5	5	3	0	5	5	16	12	13	41	685	3	3	0	3	0	1	3	3	0	3	3	3	0	3	3	3	3	3	0	3	11
686	11	1	1	support_	ASK (Kal	2	Dhaka	3	3	1	3	5	3	3	5	5	0	5	5	0	3	5	3	16	10	19	45	686	1	1	2	0	0	0	0	2	0	0	0	0	0	0	1	0	2	2	0	0	34
688	10	1	1	support_	ASK (Kal	2	Dhaka	2	0	1	5	0	0	3	0	3	0	3	3	0	3	0	0	14	3	3	20	688	0	1	2	0	0	0	0	0	0	2	0	0	0	1	1	0	0	0	1	1	21
689	16	2	2	support_	ASK (Moh	2	Dhaka	3	1	1	5	5	5	5	5	5	5	5	5	5	3	5	5	20	20	18	58	689	3	0	1	3	2	3	3	0	2	3	3	3	3	3	3	3	0	3	3	3	45
690	15	2	2	support_	ASK (Moh	2	Dhaka	3	1	1	5	5	5	5	5	5	5	5	5	5	5	5	5	15	20	25	60	690	3	0	3	3	3	3	0	3	3	3	0	3	3	0	3	3	3	0	3	3	26
691	10	1	2	support_	ASK (Moh	2	Dhaka	3	1	1	3	5	0	5	5	5	5	5	5	5	5	0	0	18	20	10	48	691	0	3	2	3	3	3	3	3	0	0	1	3	0	3	1	1	1	1	0	3	57
692	13	2	1	support_	ASK (Moh	2	Dhaka	3	1	1	3	5	0	5	0	5	5	5	3	5	1	5	3	16	20	9	45	692	0	2	2	0	3	2	3	3	3	2	3	3	2	3	2	3	2	3	3	3	8
693	10	1	2	support_	ASK (Moh	2	Dhaka	3	1	1	5	5	5	5	5	5	5	5	5	5	5	5	5	20	20	23	63	693	3	3	3	3	3	3	3	3	3	3	3	3	2	2	3	3	2	3	3	3	7
694	10	1	1	support_	ASK (Moh	2	Dhaka	3	1	1	1	5	0	3	0	3	5	1	0	5	1	0	0	4	18	1	23	694	0	0	0	0	0	3	2	0	0	0	0	1	0	0	1	0	0	0	0	0	23
695	12	1	1	support_	ASK (Moh	2	Dhaka	3	1	1	0	5	0	5	0	1	5	1	0	5	5	0	0	6	16	5	27	695	0	0	0	0	0	3	0	0	0	0	1	1	0	0	0	0	1	1	0	1	29
696	11	1	2	support_	ASD ( Ha	2	Dhaka	1	6	1	5	0	3	5	5	5	5	3	3	5	0	5	5	18	13	18	49	696	3	2	3	3	3	3	3	2	1	3	3	3	3	2	3	3	3	3	2	3	11
697	12	1	2	support_	ASD ( Ha	2	Dhaka	1	5	1	3	0	0	1	3	0	0	3	1	1	0	1	0	8	1	4	13	697	1	0	0	0	0	1	0	0	0	0	1	1	0	1	0	0	0	1	1	0	20
698	12	1	2	support_	ASD ( Ha	2	Dhaka	1	3	1	5	5	3	1	0	3	0	1	0	1	1	1	0	7	9	5	21	698	0	2	3	0	1	0	1	0	0	0	1	3	1	1	2	0	1	2	1	1	18
699	11	1	2	support_	ASD ( Ha	2	Dhaka	1	3	1	5	0	3	5	0	3	0	0	3	0	0	3	3	13	3	9	25	699	1	1	0	0	1	1	0	1	0	0	0	1	1	1	0	0	0	0	0	3	14
700	12	1	2	support_	ASD ( Ha	2	Dhaka	1	4	1	3	5	0	0	0	0	3	0	1	0	3	5	0	4	8	8	20	700	1	0	0	0	1	1	0	1	0	1	1	2	1	1	2	1	1	2	1	1	36
701	10	1	2	support_	ASD ( Ha	2	Dhaka	1	5	1	5	0	3	5	0	0	0	3	3	0	0	1	3	16	0	7	23	701	1	1	2	2	1	0	0	0	0	0	0	1	1	0	0	0	0	1	1	3	28
702	10	1	2	support_	ASD ( Ha	2	Dhaka	1	3	1	3	5	0	5	3	1	3	3	3	3	3	3	3	14	12	12	38	702	0	2	3	2	2	2	2	1	2	2	0	2	0	2	0	2	0	2	0	2	22
703	12	1	2	support_	ASD ( Ha	2	Dhaka	1	3	1	3	3	0	3	0	3	3	0	3	3	3	3	3	9	12	9	30	703	0	2	2	0	0	0	0	2	3	2	2	3	3	3	3	3	1	3	2	2	25
704	14	2	2	support_	ASD ( Ha	2	Dhaka	2	3	1	0	0	3	5	0	3	0	1	3	0	0	1	0	9	3	4	16	704	1	1	0	0	0	3	0	0	0	0	0	1	0	1	1	1	0	1	0	1	12
705	12	1	2	support_	ASD ( Ha	2	Dhaka	1	0	1	3	3	0	5	0	3	3	3	3	3	0	3	3	14	12	6	32	705	0	2	2	2	2	2	2	0	2	1	0	2	0	2	0	2	0	2	0	2	13
706	14	2	2	support_	ASD ( Ha	2	Dhaka	3	3	1	3	5	5	0	1	0	3	5	5	5	5	1	3	13	13	15	41	706	1	0	2	0	0	1	2	2	1	2	1	2	1	3	1	1	2	2	2	3	30
707	12	1	2	support_	ASD ( Ha	2	Dhaka	1	7	1	1	0	3	1	0	3	0	3	3	0	0	1	3	8	3	4	15	707	1	0	1	0	1	1	1	0	0	0	0	1	1	0	0	1	0	1	1	3	26
708	11	1	2	support_	ASD ( Ha	2	Dhaka	1	3	1	5	0	5	3	0	5	3	5	3	0	0	1	3	16	8	9	33	708	1	1	0	1	3	1	0	1	0	2	2	1	0	2	0	1	2	0	1	3	27
709	10	1	2	support_	ASD ( Ha	2	Dhaka	1	3	1	5	3	0	5	0	1	3	5	3	5	3	0	1	18	12	4	34	709	0	2	1	0	2	3	0	3	2	0	3	2	0	2	0	2	0	2	0	3	26
710	13	2	2	support_	ASD ( Ha	2	Dhaka	3	2	1	5	0	0	1	1	5	1	3	1	5	0	1	0	10	11	2	23	710	1	2	0	3	1	1	3	2	1	2	1	0	2	2	0	2	1	3	1	2	38
711	14	2	2	support_	ASD ( Ha	2	Dhaka	1	4	1	3	5	3	3	3	1	0	5	5	0	5	5	1	16	6	17	39	711	1	0	1	1	2	2	2	1	0	3	2	1	1	0	1	2	2	2	1	1	26
712	13	2	2	support_	ASD ( Ha	2	Dhaka	1	5	1	3	0	5	3	0	3	0	1	3	5	1	3	3	10	8	12	30	712	1	2	0	1	1	2	1	1	1	2	1	2	1	2	1	2	1	1	1	2	20
713	11	1	2	support_	ASD ( Ha	2	Dhaka	1	7	1	3	5	0	5	3	1	3	0	0	5	3	3	0	8	14	9	31	713	0	2	3	2	2	3	2	0	2	2	0	2	0	2	0	2	0	1	0	1	32
714	13	2	2	support_	ASD ( Ha	2	Dhaka	3	3	1	5	5	0	0	3	1	0	1	5	0	3	3	3	11	6	12	29	714	0	2	2	3	0	2	3	3	2	3	0	3	2	3	0	2	2	3	0	3	34
715	11	1	2	support_	ASD ( Ha	2	Dhaka	1	8	1	3	5	3	5	3	5	3	1	3	3	0	1	1	12	16	8	36	715	2	2	1	1	2	1	3	3	1	3	0	1	0	2	1	2	1	1	2	3	27
716	11	1	1	support_	ASD ( Ha	2	Dhaka	1	3	1	3	5	3	5	3	5	3	1	3	3	0	1	1	12	16	8	36	716	2	2	1	1	2	1	2	1	2	1	0	2	0	2	0	1	1	1	2	3	24
717	11	1	2	support_	ASD ( Ha	2	Dhaka	1	4	1	3	5	0	5	3	1	3	1	3	1	3	3	0	12	10	9	31	717	0	2	0	2	2	0	2	3	2	0	0	2	0	2	0	2	0	2	0	3	22
718	15	2	1	support_	ASK (Sha	2	Dhaka	3	4	1	5	5	3	5	3	5	0	5	1	3	5	3	5	16	13	19	48	718	3	1	0	1	1	1	1	3	1	1	2	2	0	0	1	3	1	2	1	1	33
719	13	2	1	support_	ASK (Sha	2	Dhaka	3	8	1	5	1	3	5	1	3	0	3	5	1	3	5	1	18	5	13	36	719	1	1	3	0	3	3	1	3	1	2	1	2	1	2	1	3	1	1	1	3	12
720	11	1	1	support_	ASK (Sha	2	Dhaka	3	6	1	5	1	1	3	1	0	1	5	5	0	1	0	0	18	2	3	23	720	1	1	0	0	2	0	0	1	0	0	1	3	3	3	1	3	1	2	1	0	6
721	13	2	1	support_	ASK (Sha	2	Dhaka	3	6	1	1	0	0	1	1	1	0	3	0	1	3	0	1	5	2	5	12	721	1	1	0	0	0	0	1	0	1	1	1	1	1	1	0	1	1	1	0	0	9
722	9	1	1	support_	ASK (Sha	2	Dhaka	3	6	1	1	5	0	1	0	3	1	3	0	3	0	3	0	5	12	3	20	722	0	0	0	0	0	0	0	0	0	0	0	0	0	0	0	0	2	1	0	3	13
723	13	2	1	support_	ASK (Sha	2	Dhaka	3	4	1	3	0	0	1	0	3	3	5	1	3	0	1	0	10	9	1	20	723	1	1	1	0	0	1	0	1	0	1	0	1	0	0	0	1	0	0	1	0	2
724	12	1	1	support_	ASK (Sha	2	Dhaka	3	7	1	3	1	0	0	0	0	1	3	0	3	0	3	0	6	5	3	14	724	0	0	0	0	0	0	0	0	0	0	0	0	0	2	0	0	0	0	0	0	19
725	17	2	1	support_	ASK (Sha	2	Dhaka	3	1	1	3	1	5	3	0	1	0	1	3	5	1	3	0	10	7	9	26	725	1	2	3	2	0	1	2	0	0	3	0	2	1	3	3	1	2	3	1	3	16
726	9	1	1	support_	ASK (Sha	2	Dhaka	3	7	1	3	5	3	1	1	0	3	1	0	3	0	3	0	5	11	7	23	726	0	1	1	0	1	0	0	1	1	0	1	0	0	1	0	1	1	1	0	3	17
727	13	2	1	support_	ASK (Sha	2	Dhaka	3	3	1	5	0	5	3	3	1	1	3	1	0	0	1	3	12	2	12	26	727	1	0	1	0	0	1	0	1	1	1	1	1	2	0	1	1	1	2	3	1	14
728	13	2	1	support_	ASK (Sha	2	Dhaka	3	3	1	1	0	0	1	1	1	5	3	1	3	0	1	0	6	9	2	17	728	1	1	1	0	1	0	1	0	1	0	2	1	1	0	1	1	1	0	1	0	15
729	12	1	1	support_	ASK (Sha	2	Dhaka	3	5	1	1	5	0	1	0	0	3	1	0	5	0	1	3	3	13	4	20	729	0	1	0	0	0	0	0	1	0	0	0	1	0	3	2	2	1	2	0	2	31
730	10	1	1	support_	ASK (Sha	2	Dhaka	3	3	1	1	5	3	1	3	0	3	1	0	3	0	3	3	3	11	12	26	730	0	1	2	0	1	0	1	2	1	0	1	0	0	1	0	1	2	1	0	3	10
731	13	2	2	support_	ASK (Mot	2	Dhaka	3	3	1	3	5	5	3	3	1	3	3	3	5	3	1	5	12	14	17	43	731	1	1	2	0	2	3	2	0	3	2	2	1	1	3	0	2	1	2	1	2	20
732	11	1	2	support_	ASK (Mot	2	Dhaka	3	7	1	0	5	0	0	3	5	3	0	0	5	0	3	0	0	18	6	24	732	0	0	0	0	0	0	0	2	0	0	2	0	0	0	3	3	0	0	0	0	4
733	12	1	2	support_	ASK (Mot	2	Dhaka	3	1	1	0	3	0	0	3	5	5	0	0	5	0	0	3	0	18	6	24	733	0	0	0	0	0	0	0	2	1	1	3	2	0	2	3	2	1	0	0	3	34
734	12	1	2	support_	ASK (Mot	2	Dhaka	3	1	1	1	5	0	5	1	5	0	3	0	5	5	0	5	9	15	11	35	734	1	1	2	0	3	3	1	3	0	3	1	2	2	1	2	2	1	2	1	3	21
735	12	1	2	support_	ASK (Mot	2	Dhaka	3	7	1	3	5	0	0	0	1	0	5	5	0	5	5	0	13	6	10	29	735	2	1	1	0	1	1	0	1	0	1	2	1	0	1	0	2	3	0	1	3	38
736	12	1	2	support_	ASK (Mot	2	Dhaka	3	6	1	3	0	5	1	3	5	1	3	3	1	5	0	0	10	7	13	30	736	1	1	3	2	2	0	1	3	0	3	2	3	2	3	2	1	1	2	3	3	28
737	13	2	2	support_	ASK (Mot	2	Dhaka	3	7	1	5	0	0	5	3	5	0	5	1	3	1	3	5	16	8	12	36	737	1	1	2	0	1	0	1	2	2	3	1	1	1	2	3	1	1	1	2	2	32
738	12	1	2	support_	ASK (Mot	2	Dhaka	3	7	1	1	5	0	3	3	5	3	1	3	0	5	1	0	8	13	9	30	738	1	1	2	1	2	2	1	1	0	1	2	3	3	2	1	0	3	3	0	3	29
739	12	1	2	support_	ASK (Mot	2	Dhaka	3	8	1	3	0	5	0	0	1	0	0	0	3	1	1	0	3	4	7	10	739	1	1	1	0	1	3	1	0	1	2	3	1	1	3	0	1	2	1	3	3	32
740	10	1	2	support_	ASK (Mot	2	Dhaka	3	3	1	0	5	0	3	0	5	5	0	0	5	0	0	0	3	20	0	23	740	0	0	1	0	0	0	0	3	0	0	0	0	0	0	0	0	0	0	0	0	20
741	9	1	2	support_	ASK (Mot	2	Dhaka	3	3	1	3	0	3	5	0	0	0	3	0	0	0	3	0	11	0	6	17	741	1	1	0	0	0	0	1	3	0	1	0	0	1	0	3	0	3	3	0	3	21
742	10	1	1	support_	ASK (Mot	2	Dhaka	3	3	1	3	0	0	1	5	3	0	5	0	1	3	1	0	9	4	9	22	742	1	1	0	2	3	0	1	3	0	2	1	0	2	2	0	1	0	0	2	0	14
743	12	1	1	support_	ASK (Mot	2	Dhaka	3	4	1	5	0	0	3	5	5	0	0	0	0	1	0	0	8	5	6	19	743	1	1	3	1	2	0	1	3	3	2	3	1	1	3	0	0	0	3	1	3	19
744	9	1	1	support_	ASK (Mot	2	Dhaka	3	4	1	0	5	0	0	5	5	3	0	0	3	0	3	0	0	16	6	22	744	0	0	0	0	0	0	0	3	0	0	2	0	0	0	3	2	2	0	0	2	12
745	11	1	1	support_	ASK (Mot	2	Dhaka	3	3	1	3	0	0	3	0	1	0	0	0	0	3	1	0	6	1	4	11	745	0	1	1	1	0	0	1	1	0	1	1	1	0	0	1	1	0	0	1	1	18
746	10	1	1	suport_s	ASK (Mot	2	Dhaka	3	3	1	3	0	0	1	0	5	0	3	0	5	1	1	0	7	8	2	17	746	1	1	0	2	0	0	1	2	1	1	0	2	0	2	1	1	1	0	1	1	17
747	13	2	1	suport_s	BTS, Bau	2	Dhaka	1	4	1	1	5	0	3	1	0	0	3	3	5	0	3	0	10	10	4	24	747	2	1	0	0	0	1	1	1	1	1	1	2	1	1	1	1	0	1	2	2	7
748	14	2	1	suport_s	BTS, Bau	2	Dhaka	1	8	1	1	5	0	1	5	5	5	1	0	5	1	0	0	3	20	6	29	748	0	0	1	1	1	0	0	0	0	1	0	1	0	0	0	0	0	1	0	1	14
749	13	2	1	suport_s	BTS, Bau	2	Dhaka	1	8	1	1	0	1	3	0	0	0	1	0	0	1	0	0	5	0	2	7	749	0	0	1	0	0	1	0	1	0	0	0	1	1	0	1	2	0	1	2	3	9
750	16	2	1	suport_s	BTS, Bau	2	Dhaka	2	7	1	0	5	0	3	0	0	0	1	1	3	0	3	1	5	8	4	17	750	1	0	0	0	0	0	1	2	0	0	1	2	0	0	0	1	1	0	1	3	22
751	15	2	1	suport_s	BTS, Bau	2	Dhaka	1	0	1	0	5	0	1	0	0	1	3	3	5	0	0	1	6	11	1	18	751	0	0	0	0	0	3	0	3	0	0	0	3	1	0	0	1	0	0	1	3	10
752	17	2	2	suport_s	BTS, Bau	2	Dhaka	1	9	1	1	5	1	1	0	0	0	0	0	1	0	1	1	2	6	3	11	752	1	0	0	0	0	1	0	0	0	1	1	1	0	1	1	0	1	1	0	1	16
753	14	2	2	suport_s	BTS, Bau	2	Dhaka	1	9	1	0	0	0	3	0	1	0	0	0	0	0	5	0	3	1	5	9	753	1	1	0	0	0	1	0	0	0	1	0	1	2	0	0	1	0	0	0	1	11
754	14	2	2	suport_s	BTS, Bau	2	Dhaka	1	8	1	1	5	0	3	1	0	1	3	0	0	1	5	0	7	6	7	20	754	1	0	0	0	0	1	1	0	0	1	1	0	1	0	0	0	1	1	2	1	14
755	17	2	1	suport_s	BTS, Bau	2	Dhaka	1	9	1	0	3	5	0	0	1	0	0	0	0	0	0	1	0	3	6	9	755	1	1	1	0	1	1	0	1	1	1	1	0	1	1	1	0	1	1	1	1	18
757	12	1	2	support_	ASK (Mir	2	Dhaka	1	1	1	3	0	1	1	3	1	0	3	0	3	3	5	5	7	4	17	28	757	1	1	1	1	0	0	0	1	0	1	1	1	0	0	1	1	1	1	1	1	18
758	13	2	1	support_	ASK (Mir	2	Dhaka	3	2	1	3	0	1	3	5	5	3	1	3	1	3	0	3	10	9	12	31	758	1	1	1	0	0	0	1	1	1	0	1	2	1	0	1	1	1	1	2	3	3
759	12	1	2	support_	ASK (Mir	2	Dhaka	1	5	1	1	5	3	1	0	1	3	1	0	1	1	0	5	3	10	9	22	759	1	1	1	1	1	0	1	3	1	1	0	1	1	1	0	1	1	1	1	0	17
760	12	1	2	support_	ASK (Mir	2	Dhaka	3	1	1	3	5	1	5	0	3	5	3	0	0	5	0	0	11	13	6	30	760	0	1	0	0	0	0	0	0	0	0	1	0	0	0	0	0	0	0	1	0	25
762	12	1	2	support_	ASK (Mir	2	Dhaka	1	1	1	3	3	1	3	1	3	0	3	0	3	3	5	5	9	9	15	33	762	1	1	1	1	0	0	0	1	0	1	1	2	1	0	1	1	1	1	1	2	29
763	13	2	1	support_	ASK (Mir	2	Dhaka	4	5	1	3	1	0	3	1	3	5	3	3	5	0	1	0	12	14	2	28	763	2	1	2	1	2	1	1	1	1	2	1	2	0	1	1	1	1	3	0	3	16
764	11	1	1	support_	ASK (Mir	2	Dhaka	2	1	1	1	1	3	0	3	1	5	0	1	5	0	1	0	1	12	7	20	764	0	0	0	0	0	3	0	1	0	1	1	2	0	2	0	2	3	3	0	3	1
765	10	1	2	support_	ASK (Mir	2	Dhaka	2	4	1	3	5	1	5	3	3	5	3	0	1	0	0	0	11	14	4	29	765	0	1	0	0	0	0	0	0	0	0	0	0	0	0	0	0	0	0	0	0	11
766	11	1	2	support_	ASK (Mir	2	Dhaka	2	2	1	3	0	1	5	3	3	5	3	0	1	0	3	1	11	9	8	28	766	1	2	1	1	0	0	0	0	0	1	0	1	0	2	0	0	0	0	1	1	15
767	11	1	2	support_	ASD (Hap	2	Dhaka	3	1	1	3	5	5	0	5	3	1	5	5	5	1	5	0	18	14	16	48	767	1	2	1	2	0	0	1	0	1	0	1	1	1	1	0	1	0	1	2	1	29
768	12	1	2	support_	ASD (Hap	2	Dhaka	1	4	1	3	0	0	3	5	1	1	5	0	0	5	5	1	11	2	16	29	768	0	3	1	0	2	1	3	2	1	2	1	2	1	1	0	2	0	1	3	3	27
769	12	1	2	support_	ASD (Hap	2	Dhaka	3	5	1	3	5	0	5	5	1	1	5	1	5	1	5	0	14	12	11	37	769	1	2	1	0	0	0	1	0	1	2	1	2	1	1	1	2	2	1	3	3	15
770	11	1	2	support_	ASD (Hap	2	Dhaka	3	5	1	5	5	0	3	3	3	5	5	3	3	5	3	0	16	16	11	43	770	1	2	1	0	1	2	0	3	2	2	1	2	0	1	2	2	1	2	3	1	16
771	12	1	2	support_	ASD (Hap	2	Dhaka	3	5	1	3	3	0	3	1	0	0	3	3	0	1	0	0	10	16	10	36	771	1	1	0	0	0	2	1	1	0	0	1	0	1	0	1	0	1	1	2	2	18
772	13	2	2	support_	ASD (Hap	2	Dhaka	3	4	1	3	5	1	3	1	5	3	3	1	3	3	5	0	12	3	2	17	772	1	1	1	0	1	0	0	1	1	1	1	1	0	1	0	0	1	2	3	2	36
773	14	2	2	support_	ASD (Hap	2	Dhaka	2	3	1	5	0	0	1	5	1	3	5	3	3	0	3	0	14	7	8	29	773	2	0	1	0	1	0	0	1	1	1	0	1	0	1	0	0	1	0	0	2	32
774	11	1	2	support_	ASD (Hap	2	Dhaka	1	3	1	5	5	0	1	5	1	3	5	3	1	5	0	0	14	10	10	34	774	1	0	2	1	2	0	1	3	1	1	0	2	0	1	0	2	1	0	1	3	14
775	13	2	2	support_	ASD (Hap	2	Dhaka	3	3	1	5	5	3	3	1	1	5	1	5	0	0	0	0	14	11	4	29	775	1	2	1	0	0	3	0	3	3	1	3	3	2	1	1	3	1	2	3	3	20
776	12	1	2	support_	ASD (Hap	2	Dhaka	3	5	1	5	5	1	3	0	1	5	3	0	0	0	3	0	11	11	4	26	776	1	0	1	0	0	1	0	1	1	3	1	0	0	1	1	0	1	2	3	3	24
777	12	1	2	support_	ASD (Hap	2	Dhaka	3	3	1	0	0	0	1	0	1	0	0	1	5	3	1	0	6	4	12	19	777	3	0	0	0	0	0	1	1	2	0	1	2	3	3	2	1	0	2	2	1	14
778	13	2	2	support_	ASD (Hap	2	Dhaka	3	3	1	3	0	0	3	0	0	5	3	1	5	5	0	0	10	5	25	12	778	1	2	1	0	1	0	0	1	1	1	0	1	3	0	0	0	0	1	1	0	38
779	10	1	2	support_	ASD (Hap	2	Dhaka	3	4	1	0	0	5	0	3	5	1	5	3	5	1	3	0	11	12	31	17	779	0	0	1	0	0	2	0	0	1	0	1	3	1	2	0	1	1	0	1	2	30
780	11	1	2	support_	ASD (Hap	2	Dhaka	1	3	1	3	0	0	3	0	0	5	1	5	0	3	0	0	5	3	20	13	780	1	2	1	0	1	0	0	1	1	1	0	1	3	0	0	0	0	1	1	0	12
781	10	1	2	support_	ASD (Hap	2	Dhaka	3	4	1	1	5	0	1	5	3	1	5	1	3	5	0	0	12	10	30	28	781	2	2	1	0	1	1	3	1	1	0	1	2	3	1	1	3	1	2	3	1	21
782	10	1	2	support_	ASD (Hap	2	Dhaka	3	2	1	1	3	3	1	3	3	5	3	5	3	5	1	0	14	14	38	21	782	1	1	1	0	1	1	0	1	2	1	1	2	0	1	1	1	1	1	2	2	28
783	13	2	2	support_	ASD (Hap	2	Dhaka	2	2	1	1	3	3	0	5	3	5	1	1	5	0	1	1	16	9	28	33	783	2	1	1	2	3	2	2	1	2	0	1	2	1	1	2	1	2	2	3	1	25
784	10	1	2	support_	ASD (Hap	2	Dhaka	1	3	1	0	5	3	1	0	0	5	5	3	5	5	0	0	18	8	32	12	784	1	0	1	0	0	2	0	2	0	0	0	1	1	0	0	0	0	1	2	1	33
785	14	2	2	support_	ASD (Hap	2	Dhaka	4	6	1	3	5	3	5	5	5	3	5	5	5	0	5	1	18	14	50	16	785	3	0	0	0	0	1	1	0	0	0	1	0	0	0	0	3	3	1	0	3	8
786	13	2	2	support_	ASD (Hap	2	Dhaka	1	7	1	1	3	0	1	1	1	3	3	0	5	0	0	0	12	1	18	30	786	1	2	1	0	2	3	0	3	2	2	1	2	1	0	1	0	0	2	3	1	28
787	12	1	2	support_	ASD (Hap	2	Dhaka	1	6	1	1	5	0	3	1	0	5	5	0	0	0	3	0	10	4	23	26	787	1	1	0	0	0	1	1	1	0	1	2	2	1	2	3	1	3	2	3	3	14
788	13	2	2	support_	ASD (Hap	2	Dhaka	1	4	1	3	5	0	1	0	3	0	5	3	1	0	0	0	9	0	21	14	788	0	0	0	0	0	0	0	1	1	0	1	2	3	0	0	0	0	1	2	3	29
789	11	1	2	support_	ASD (Hap	2	Dhaka	1	5	1	3	5	0	3	3	5	5	5	0	0	0	1	0	15	4	30	33	789	2	0	0	0	1	3	1	3	1	0	2	2	1	3	3	2	1	3	2	3	12
790	11	1	2	support_	ASD (Hap	2	Dhaka	1	5	1	3	5	1	0	1	0	3	0	0	0	0	3	3	8	8	19	12	790	0	1	0	0	0	1	0	1	1	0	1	1	2	0	0	0	0	1	1	2	25
791	11	1	2	support_	ASD (Hap	2	Dhaka	1	4	1	0	5	3	1	0	5	5	3	3	1	0	1	0	16	4	27	25	791	1	2	1	0	0	1	1	1	0	2	1	1	2	0	1	2	3	3	2	1	18
792	13	2	2	support_	ASD (Hap	2	Dhaka	1	3	1	1	1	1	0	0	1	0	5	0	3	5	3	1	5	10	20	29	792	2	1	0	2	2	2	0	1	0	2	2	0	2	1	3	3	1	1	3	1	24
793	11	1	2	support_	ASD (Hap	2	Dhaka	1	5	1	1	5	0	1	0	5	1	1	1	1	1	5	1	12	7	23	18	793	0	1	2	0	0	1	0	3	0	0	0	2	0	2	0	1	0	3	0	3	28
794	17	2	2	support_	ASD (Hap	2	Dhaka	2	3	1	5	3	0	5	1	1	5	5	3	1	0	3	0	10	4	32	22	794	2	1	1	0	0	3	0	0	0	1	3	2	1	0	0	0	3	2	3	0	21
795	11	1	2	support_	ASD (Hap	2	Dhaka	1	0	1	5	0	0	1	1	0	3	5	3	0	5	3	0	3	9	26	28	795	1	1	1	0	3	3	0	3	1	0	2	3	1	0	0	0	0	3	3	3	28
796	13	2	2	support_	ASD (Hap	2	Dhaka	1	4	1	3	0	5	3	3	0	1	3	1	1	3	1	3	2	15	27	27	796	1	1	1	0	1	1	0	3	0	1	1	2	3	2	0	0	0	2	2	3	20
797	13	2	2	support_	ASD (Hap	2	Dhaka	1	5	1	3	5	0	1	1	0	3	3	5	5	1	5	0	13	7	32	20	797	1	0	0	0	0	0	1	1	1	0	1	2	1	2	1	0	1	2	3	3	19
798	9	1	2	support_	SPP (Gaz	2	Gazipur	1	5	1	3	5	3	5	0	0	3	3	3	1	0	5	0	14	9	8	31	798	1	1	3	3	0	1	0	3	1	3	1	1	1	1	1	1	0	2	1	3	17
799	9	1	2	support_	SPP (Gaz	2	Gazipur	1	4	1	3	1	0	5	0	0	1	1	3	1	3	1	5	12	3	9	24	799	0	0	1	2	0	1	0	1	0	1	1	2	1	1	1	1	1	1	1	1	12
800	10	1	2	support_	SPP (Gaz	2	Gazipur	1	3	1	3	5	3	5	5	5	3	5	1	5	1	3	5	14	18	14	46	800	0	1	1	3	0	1	0	0	0	1	1	1	0	1	0	0	1	1	0	0	28
801	16	2	2	support_	SPP (Gaz	2	Gazipur	1	4	1	1	3	5	0	5	5	0	5	1	1	3	5	3	7	9	19	35	801	2	0	1	0	0	0	2	1	0	2	1	3	2	1	0	1	0	2	0	0	19
802	10	1	2	support_	SPP (Gaz	2	Gazipur	1	8	1	3	5	3	5	3	1	3	3	1	5	1	5	3	12	14	15	41	802	0	0	3	2	2	1	0	2	0	2	1	1	0	2	2	3	2	2	0	3	10
803	10	1	2	support_	SPP (Gaz	2	Gazipur	1	4	1	3	5	3	5	1	5	3	1	0	3	5	5	0	9	16	14	39	803	0	0	3	0	0	0	0	1	0	3	0	0	0	0	1	1	0	0	0	1	17
804	10	1	2	support_	SPP (Gaz	2	Gazipur	1	4	1	0	3	0	5	5	5	1	0	1	5	0	5	0	6	14	10	30	804	1	0	1	0	0	0	1	0	0	2	2	1	0	2	0	0	0	1	3	3	22
805	9	1	2	support_	SPP (Gaz	2	Gazipur	1	4	1	0	5	1	3	5	1	3	3	5	0	3	5	0	11	9	14	34	805	2	1	1	0	0	1	1	0	1	2	1	2	0	1	2	1	2	1	0	3	28
806	11	1	2	support_	SPP (Gaz	2	Gazipur	1	4	1	0	3	0	5	3	0	5	0	1	5	5	5	0	6	13	13	32	806	3	0	3	0	0	1	2	0	0	3	0	1	3	2	3	2	1	1	0	3	15
807	10	1	2	support_	SPP (Gaz	2	Gazipur	1	4	2	1	5	3	5	3	1	1	3	3	5	3	3	0	12	12	12	36	807	1	1	3	2	2	1	2	1	1	1	1	2	0	1	1	1	1	0	3	2	12
808	12	1	2	support_	SPP (Gaz	2	Gazipur	1	3	1	3	5	3	5	1	1	5	3	3	5	5	5	3	14	16	17	47	808	1	1	2	0	1	1	0	1	1	1	1	1	1	1	1	0	1	1	1	2	23
809	13	2	2	support_	SPP (Gaz	2	Gazipur	1	6	1	3	3	1	0	3	3	3	5	1	3	3	3	1	9	12	11	32	809	1	1	0	1	0	1	1	1	1	1	1	1	3	1	1	0	1	3	1	3	32
810	13	2	2	support_	SPP (Gaz	2	Gazipur	1	6	1	3	1	3	5	0	5	1	3	1	5	5	5	3	12	12	16	40	810	2	3	0	0	0	3	2	3	1	3	1	1	2	2	1	1	1	3	2	1	22
811	13	2	2	support_	SPP (Gaz	2	Gazipur	1	4	1	3	0	1	5	1	3	1	5	5	1	1	5	0	18	5	8	31	811	1	3	0	0	1	1	1	0	0	3	3	2	1	0	0	0	1	2	1	2	21
812	14	2	2	support_	SPP (Gaz	2	Gazipur	1	5	1	1	3	3	5	0	3	5	5	5	5	1	5	5	16	16	14	46	812	3	0	1	1	0	1	1	0	0	3	1	1	1	2	1	2	1	0	1	1	33
813	13	2	2	support_	SPP (Gaz	2	Gazipur	1	6	1	0	0	5	0	0	0	1	3	1	5	5	5	5	4	6	20	30	813	3	0	3	2	3	0	1	0	0	3	3	1	3	0	3	3	0	3	0	2	30
814	13	2	2	support_	SPP (Gaz	2	Gazipur	1	7	1	3	3	3	1	0	5	5	3	5	5	1	3	1	12	18	8	38	814	1	1	3	1	1	1	1	2	1	3	2	1	0	1	3	3	1	2	0	2	15
815	11	1	1	support_	SPP (Gaz	2	Gazipur	1	5	1	3	0	0	0	0	0	0	0	3	0	0	0	3	6	0	3	9	815	1	1	0	0	0	0	1	3	0	0	0	2	2	1	0	1	0	0	1	2	20
816	10	1	1	support_	SPP (Gaz	2	Gazipur	1	4	1	5	0	0	0	0	0	0	3	3	0	3	0	3	11	0	7	18	816	0	1	1	0	0	0	1	2	3	0	1	2	0	1	2	0	1	2	1	2	17
817	9	1	1	support_	SPP (Gaz	2	Gazipur	1	3	1	1	0	5	1	1	1	1	3	5	0	1	5	1	9	0	11	20	817	1	1	0	0	0	0	1	3	0	0	0	1	2	1	0	1	0	1	2	3	19
818	9	1	1	support_	SPP (Gaz	2	Gazipur	1	2	1	5	0	0	0	0	0	0	3	3	0	3	0	3	11	0	6	17	818	1	1	0	0	0	0	1	3	0	2	0	1	0	1	0	2	3	1	0	3	21
819	9	1	1	support_	SPP (Gaz	2	Gazipur	1	2	1	5	0	0	0	0	0	0	3	3	5	5	0	3	11	5	8	24	819	1	1	0	0	0	0	1	3	0	2	0	2	2	3	0	1	1	0	1	3	16
820	12	1	1	support_	SPP (Gaz	2	Gazipur	1	3	1	3	0	1	0	0	0	0	0	0	0	1	0	1	3	0	3	6	820	1	1	0	0	0	0	1	0	0	0	1	1	2	1	1	1	1	1	1	2	29
821	10	1	1	support_	SPP (Gaz	2	Gazipur	1	2	1	3	0	1	0	0	0	0	3	3	5	0	0	5	9	5	6	20	821	1	1	0	0	0	1	3	0	0	0	1	1	2	1	1	1	1	1	0	1	15
822	10	1	1	support_	SPP (Gaz	2	Gazipur	1	3	1	3	0	1	0	0	0	0	0	1	0	1	0	0	4	0	2	6	822	1	1	0	0	0	0	1	0	0	0	1	1	2	1	0	1	0	1	2	3	12
823	10	1	1	support_	SPP (Gaz	2	Gazipur	1	3	4	3	0	1	0	0	0	0	3	1	0	0	1	1	7	0	3	10	823	1	1	2	3	0	3	1	1	0	1	2	1	3	3	0	0	1	3	3	2	27
824	10	1	1	support_	SPP (Gaz	2	Gazipur	1	5	1	3	0	5	1	0	0	0	1	1	0	0	0	3	6	0	8	14	824	1	1	0	0	0	0	0	1	0	0	1	2	1	0	1	1	1	1	1	0	20
825	11	1	1	support_	SPP (Gaz	2	Gazipur	1	2	1	0	0	5	0	0	3	0	0	0	0	0	0	0	0	3	5	8	825	0	0	3	0	0	0	0	3	3	0	2	0	0	1	0	1	3	1	0	3	12
826	9	1	1	support_	SPP (Gaz	2	Gazipur	1	2	1	0	0	0	0	0	3	3	0	0	0	3	0	3	0	6	6	12	826	1	1	0	0	0	1	0	0	1	0	0	0	1	1	1	1	1	0	0	3	32
827	10	1	2	support_	ASD (Hap	2	Dhaka	1	3	1	5	0	3	3	5	3	3	5	1	1	5	5	3	14	7	21	42	827	1	3	0	2	0	1	2	2	3	3	1	1	0	3	0	1	2	3	3	1	13
828	12	1	2	support_	ASD (Hap	2	Dhaka	3	3	1	1	0	1	1	5	1	5	3	3	3	1	1	5	10	11	13	34	828	1	2	1	1	1	2	2	2	3	2	3	0	3	1	3	1	2	3	3	2	25
829	12	1	2	support_	ASD (Hap	2	Dhaka	1	4	1	5	1	1	3	5	0	5	5	5	5	1	5	3	18	10	14	42	829	1	2	1	1	2	1	0	0	3	0	0	0	3	3	3	0	3	2	3	1	13
830	12	1	2	support_	ASD (Hap	2	Dhaka	3	2	1	5	3	0	3	0	3	3	3	3	0	1	5	1	14	9	7	30	830	1	1	1	2	3	1	0	1	2	2	0	1	1	2	1	1	2	1	1	1	30
831	10	1	2	support_	ASD (Hap	2	Dhaka	1	3	1	3	0	1	3	5	3	3	3	3	1	1	5	3	12	7	15	24	831	1	1	1	1	1	1	0	0	0	1	1	0	1	0	1	1	0	1	1	0	27
832	10	1	2	support_	ASD (Hap	2	Dhaka	1	3	1	3	1	5	3	5	0	3	3	3	0	0	5	0	12	4	15	31	832	2	1	0	0	1	0	2	0	0	2	1	3	0	3	3	3	3	2	0	1	27
833	12	1	2	support_	ASD (Hap	2	Dhaka	3	3	1	5	0	5	5	5	5	3	3	3	1	1	5	5	16	9	21	46	833	2	1	1	0	0	2	1	3	1	2	3	2	1	1	1	0	1	2	3	3	21
834	12	1	2	support_	ASD (Hap	2	Dhaka	3	4	1	1	0	1	3	0	3	3	1	5	5	1	5	0	10	11	6	27	834	1	1	0	0	0	2	1	0	1	2	1	3	1	0	2	0	2	1	0	3	21
835	12	1	2	support_	ASD (Hap	2	Dhaka	3	5	1	3	0	0	1	3	0	3	3	0	5	3	0	0	7	8	6	21	835	1	2	0	0	0	1	1	2	1	2	1	3	0	0	0	0	1	3	0	3	24
836	12	1	2	support_	ASD (Hap	2	Dhaka	3	4	1	1	0	0	3	5	0	1	1	0	3	0	5	0	5	4	10	19	836	1	2	0	0	0	0	1	0	1	3	0	2	1	0	1	2	2	3	3	2	15
837	13	2	2	support_	ASD (Hap	2	Dhaka	3	5	1	5	1	3	5	3	3	1	1	1	5	3	5	0	12	19	14	35	837	1	1	1	0	1	2	0	0	0	1	3	2	0	0	0	0	0	1	0	2	23
838	12	1	2	support_	ASD (Hap	2	Dhaka	3	6	1	0	3	3	1	1	0	1	3	1	5	3	0	0	5	9	7	21	838	1	1	1	1	1	1	1	1	1	2	0	1	2	1	2	1	1	1	0	3	7
839	13	2	2	support_	ASD (Hap	2	Dhaka	1	5	1	3	1	0	0	1	3	1	5	3	3	0	3	0	11	8	4	22	839	0	0	1	0	0	0	1	0	1	0	1	1	0	0	2	1	0	1	2	2	13
841	11	1	2	support_	ASD (Hap	2	Dhaka	3	3	1	5	0	0	3	5	0	3	5	3	1	0	5	0	16	4	10	30	841	2	2	0	0	0	0	1	3	1	1	2	3	2	3	1	1	1	1	1	3	31
842	10	1	2	support_	ASD (Hap	2	Dhaka	3	5	1	3	0	3	1	3	5	3	5	3	5	3	5	1	12	13	15	40	842	1	2	3	2	0	0	1	1	3	1	2	1	3	1	3	1	1	2	0	3	27
843	10	1	2	support_	ASD (Hap	2	Dhaka	3	3	1	3	0	3	1	1	5	3	5	3	1	0	5	1	12	9	10	31	843	1	2	0	2	2	0	1	1	3	0	3	1	1	1	3	1	1	3	0	1	11
844	11	1	2	support_	ASD (Hap	2	Dhaka	1	2	1	0	5	1	0	3	3	5	0	1	5	0	0	0	4	18	3	24	844	2	1	1	3	0	1	0	3	1	3	2	0	1	2	0	1	2	0	3	1	20
845	15	2	2	support_	ASD (Hap	2	Dhaka	1	2	1	5	5	5	0	3	5	1	0	0	5	0	5	5	5	16	23	44	845	0	1	1	0	1	3	0	0	0	2	0	1	0	2	3	1	3	0	0	1	30
846	11	1	2	support_	ASD (Hap	2	Dhaka	1	3	1	1	3	0	0	0	3	3	1	1	0	0	1	0	3	9	1	13	846	0	1	2	0	2	1	2	1	0	1	0	1	2	1	2	0	1	0	0	3	19
847	9	1	2	support_	ASD (Hap	2	Dhaka	1	3	1	1	5	0	3	5	1	0	0	3	3	3	0	0	10	6	8	24	847	0	2	2	0	0	2	0	1	0	0	3	2	0	0	2	0	0	2	0	3	17
848	10	1	2	support_	ASD (Hap	2	Dhaka	1	2	1	0	3	3	3	1	0	0	3	1	0	3	3	3	7	3	13	23	848	0	1	0	0	1	2	1	2	1	0	1	0	0	1	2	1	0	1	0	3	24
849	11	1	2	support_	ASD (Hap	2	Dhaka	1	1	1	3	5	0	3	0	3	0	5	5	5	0	0	0	16	13	0	29	849	0	2	2	0	0	2	1	2	0	2	0	1	2	0	1	2	2	1	2	2	26
850	11	1	2	support_	ASD (Hap	2	Dhaka	1	3	1	1	5	0	3	0	3	5	5	5	5	3	0	5	14	18	8	40	850	1	2	0	0	0	0	0	3	3	0	1	1	3	2	1	2	0	3	1	3	31
851	11	1	2	support_	ASD (Hap	2	Dhaka	3	1	1	1	3	3	0	3	3	0	3	3	3	3	0	3	7	9	12	28	851	1	1	1	0	0	1	1	1	0	0	1	0	0	1	0	1	0	0	1	1	13
852	12	1	2	support_	ASD (Hap	2	Dhaka	2	4	1	3	5	0	3	1	0	5	3	0	5	1	3	5	9	15	10	34	852	2	0	1	0	2	0	1	1	2	3	2	0	0	3	1	0	1	1	2	3	28
853	13	2	2	support_	ASD (Hap	2	Dhaka	2	2	1	0	5	0	5	0	1	5	5	5	5	5	0	0	15	16	5	36	853	0	1	2	3	0	3	2	0	0	3	1	3	0	1	2	3	0	1	0	3	54
854	11	1	2	support_	ASD (Hap	2	Dhaka	1	3	1	3	5	1	5	5	1	5	3	1	5	3	5	5	12	16	19	47	854	0	1	1	3	3	1	3	1	1	2	1	2	0	1	2	3	1	1	3	1	17
855	10	1	2	support_	ASD (Hap	2	Dhaka	1	6	1	0	0	1	0	0	1	0	1	0	1	0	5	0	1	2	6	9	855	2	2	1	0	0	1	2	3	0	0	0	1	0	2	1	1	0	0	0	1	14
856	12	1	2	support_	ASD (Hap	2	Dhaka	1	1	1	3	5	3	1	0	5	5	1	5	5	5	0	0	10	20	18	38	856	2	1	1	0	0	1	1	0	1	0	0	1	1	2	1	0	0	0	0	1	32
857	13	2	2	support_	ASD (Hap	2	Dhaka	1	5	1	5	5	3	5	5	0	5	5	1	1	0	3	0	16	11	11	38	857	1	3	1	0	0	2	3	0	1	1	3	3	1	2	1	3	1	3	0	3	31
858	15	2	2	support_	ASD (Hap	2	Dhaka	1	4	1	3	5	3	3	5	3	5	5	3	5	0	1	0	14	18	12	44	858	2	1	3	0	2	2	1	3	0	0	1	2	2	1	3	3	1	0	0	3	21
859	14	2	2	suport_s	ASK (Sha	2	Dhaka	1	8	1	5	5	3	5	3	5	5	5	3	5	5	1	5	18	20	14	52	859	2	1	1	0	1	2	1	1	1	2	2	2	2	2	1	1	2	2	2	3	1
860	12	1	2	suport_s	ASK (Sha	2	Dhaka	3	9	1	3	5	0	5	1	3	3	3	3	1	0	3	0	14	12	4	30	860	2	1	0	0	0	0	0	0	1	1	0	0	0	1	0	0	1	0	0	0	15
861	11	1	2	suport_s	ASK (Sha	2	Dhaka	3	6	1	3	0	0	3	0	5	0	1	3	0	0	3	0	10	5	3	18	861	0	1	0	0	0	0	2	0	0	1	2	1	0	0	1	1	0	1	1	2	49
862	12	1	2	suport_s	ASK (Sha	2	Dhaka	3	5	1	3	5	3	1	3	3	0	3	3	5	0	3	0	10	13	9	32	862	0	0	1	1	0	1	1	1	1	0	1	1	1	0	1	0	0	1	1	3	25
863	12	1	2	suport_s	ASK (Sha	2	Dhaka	3	4	1	3	5	3	3	5	1	5	5	3	5	0	5	0	14	16	13	43	863	0	1	1	1	1	1	1	1	0	2	2	3	2	1	2	1	1	0	1	3	38
864	13	2	2	suport_s	ASK (Sha	2	Dhaka	3	7	1	3	5	5	3	1	3	1	5	3	1	5	5	3	14	10	19	43	864	2	1	2	1	1	2	1	2	2	2	1	2	1	3	2	2	2	3	3	3	13
865	10	1	2	suport_s	ASK (Sha	2	Dhaka	3	5	1	3	5	0	5	5	5	5	5	5	5	5	5	5	18	20	20	58	865	3	3	3	3	3	3	2	3	3	3	0	2	0	3	3	3	3	3	0	3	54
866	10	1	2	suport_s	ASK (Sha	2	Dhaka	3	2	1	3	5	0	5	5	5	5	5	5	5	5	5	5	18	20	20	58	866	3	3	3	3	3	3	3	3	3	3	3	3	0	3	3	3	3	3	0	3	26
867	12	1	2	suport_s	ASK (Sha	2	Dhaka	3	2	1	0	5	3	1	0	1	3	5	0	1	0	0	0	6	10	3	19	867	0	0	1	0	0	1	0	0	1	0	1	0	1	0	0	1	1	0	3	3	5
868	12	1	2	suport_s	ASK (Sha	2	Dhaka	3	6	1	0	0	0	0	0	0	0	0	0	0	0	0	0	0	0	0	0	868	0	0	1	0	0	0	0	1	0	0	0	1	0	0	0	0	0	1	1	0	19
869	13	2	2	suport_s	ASK (Sha	2	Dhaka	3	5	1	5	1	3	5	3	1	1	5	5	3	0	3	0	20	6	9	35	869	1	1	2	1	2	2	0	2	0	1	0	1	1	1	1	0	0	1	1	1	22
870	13	2	2	suport_s	ASK (Sha	2	Dhaka	2	6	1	3	5	0	3	5	5	5	5	5	1	0	5	0	16	16	10	42	870	3	3	3	3	3	3	3	3	3	3	3	3	0	3	3	3	3	3	0	3	27
871	11	1	2	suport_s	ASK (Sha	2	Dhaka	2	6	1	1	5	3	0	0	0	1	0	3	1	0	1	0	4	7	4	15	871	0	0	1	1	0	1	1	0	1	1	1	2	1	0	0	1	1	0	2	1	28
872	10	1	2	suport_s	ASK (Sha	2	Dhaka	3	5	1	3	0	3	0	1	5	1	3	3	0	0	3	0	9	6	7	22	872	0	1	3	3	0	1	1	3	1	1	0	1	2	1	1	0	2	0	3	2	10
873	13	2	2	suport_s	ASK (Sha	2	Dhaka	2	4	1	3	5	0	5	5	5	5	5	5	3	0	3	0	0	13	3	0	873	2	2	0	0	3	2	3	3	3	3	0	0	0	0	0	3	0	0	0	3	15
874	10	1	2	suport_s	ASK (Sha	2	Dhaka	3	5	1	0	3	3	0	0	0	5	0	0	3	0	0	0	18	20	8	46	874	0	0	1	0	0	0	0	0	0	3	0	1	1	0	0	1	0	0	0	3	45
875	12	1	2	suport_s	ASK (Sha	2	Dhaka	1	2	2	5	0	5	5	1	1	0	5	1	0	0	5	0	16	1	11	28	875	2	3	2	1	2	2	0	1	0	2	2	2	3	0	0	0	2	2	3	2	11
876	14	2	2	School	Banani B	1	Dhaka	1	6	1	1	3	3	3	1	5	5	0	1	0	1	5	0	4	13	10	27	876	2	1	0	0	0	2	0	3	1	0	1	2	1	3	0	0	1	1	1	3	23
877	13	2	2	School	Banani B	1	Dhaka	1	9	1	1	5	3	3	0	3	5	3	1	5	0	1	1	8	18	5	31	877	1	0	1	0	1	1	2	1	1	1	2	1	2	2	1	2	1	1	1	1	10
878	13	2	2	School	Banani B	1	Dhaka	1	9	1	5	3	1	1	0	0	0	5	0	0	0	0	0	11	3	7	21	878	2	0	1	0	1	1	0	2	0	2	0	0	0	0	1	0	0	0	0	0	41
879	14	2	2	School	Banani B	1	Dhaka	1	9	1	5	0	5	5	5	0	0	5	5	0	3	5	3	20	0	21	41	879	3	2	3	2	2	1	2	3	2	2	3	3	0	3	2	2	2	1	2	1	20
880	13	2	2	School	Banani B	1	Dhaka	1	9	1	1	0	0	3	0	0	0	1	0	1	5	1	1	5	0	7	12	880	2	0	2	1	2	1	0	0	0	1	2	2	0	2	0	1	0	1	0	3	16
881	13	2	2	School	Banani B	1	Dhaka	1	9	1	3	5	5	5	0	3	3	5	3	5	5	3	3	16	16	16	48	881	2	0	1	1	0	2	0	1	1	0	1	1	0	1	0	0	1	1	1	2	21
882	14	2	2	School	Banani B	1	Dhaka	1	9	1	5	5	3	5	5	5	3	5	5	3	5	3	1	20	16	17	53	882	2	1	1	2	0	2	0	0	1	0	2	1	2	2	0	0	2	1	2	0	36
883	13	2	2	School	Banani B	1	Dhaka	1	9	2	0	5	0	1	1	5	5	1	0	5	1	5	0	2	20	7	29	883	0	0	1	0	2	2	0	0	0	0	1	1	2	2	1	0	0	0	1	0	15
884	13	2	2	School	Banani B	1	Dhaka	1	9	1	5	3	5	3	5	5	5	3	5	5	5	0	5	16	18	20	54	884	3	0	3	1	2	1	1	2	1	2	1	3	0	3	2	2	3	2	1	3	30
885	14	2	2	School	Banani B	1	Dhaka	1	9	1	3	5	5	5	3	5	5	3	5	5	3	0	1	16	20	12	48	885	1	0	1	1	2	1	1	3	0	3	2	2	2	2	1	1	1	2	2	2	15
886	14	2	2	School	Banani B	1	Dhaka	1	9	1	0	1	1	5	0	0	3	3	0	3	1	0	1	8	7	3	18	886	2	1	2	0	0	1	0	1	0	1	1	1	0	1	0	0	0	2	1	1	9
887	14	2	2	School	Banani B	1	Dhaka	1	9	1	1	1	3	0	1	1	3	1	0	0	1	1	0	2	5	6	13	887	1	0	1	0	1	0	1	0	1	0	0	1	1	0	0	0	1	1	0	0	33
888	13	2	2	School	Banani B	1	Dhaka	1	9	4	3	3	1	3	0	0	0	1	0	0	3	0	0	7	3	4	14	888	0	1	1	0	1	1	0	1	0	1	0	1	0	1	0	0	1	0	1	1	12
889	13	2	2	School	Banani B	1	Dhaka	1	9	1	3	5	5	1	3	5	5	3	1	5	5	5	5	8	20	23	51	889	1	0	1	1	1	3	1	3	1	3	2	3	0	2	1	2	2	2	1	3	27
890	14	2	2	School	Banani B	1	Dhaka	1	9	1	5	3	0	3	5	5	5	0	3	5	0	0	0	11	18	5	34	890	1	2	3	0	0	2	1	2	1	0	1	3	1	2	0	1	2	0	3	2	27
891	14	2	2	School	Banani B	1	Dhaka	1	9	1	3	5	3	1	1	5	5	3	0	5	0	0	0	7	20	4	31	891	1	2	0	3	2	1	0	0	1	3	2	3	0	1	2	0	1	1	1	3	15
892	14	2	2	School	Banani B	1	Dhaka	1	9	1	3	5	1	1	0	5	5	0	0	5	5	0	0	4	20	6	30	892	1	0	0	0	2	3	0	0	0	1	1	2	2	0	0	0	0	1	1	1	26
893	14	2	2	School	Banani B	1	Dhaka	1	9	1	3	1	3	0	0	0	0	0	1	3	0	0	0	4	4	3	11	893	1	1	2	2	3	1	1	2	2	2	2	1	1	1	1	0	1	0	1	1	15
894	14	2	2	School	Banani B	1	Dhaka	1	9	1	1	3	3	0	0	0	3	1	0	3	1	0	0	2	9	4	15	894	1	0	2	1	1	0	0	3	0	1	0	2	0	2	0	0	0	1	0	1	17
895	14	2	2	School	Banani B	1	Dhaka	1	9	1	3	5	3	1	0	5	0	1	0	5	1	3	0	5	15	7	27	895	1	0	0	1	2	1	0	1	0	1	1	0	0	1	0	1	0	3	3	1	32
896	14	2	2	School	Banani B	1	Dhaka	1	9	1	1	5	1	3	5	5	5	3	3	5	1	0	0	10	20	9	39	896	0	0	2	2	3	3	0	0	0	1	3	3	3	3	0	0	1	3	2	3	14
897	14	2	2	School	Banani B	1	Dhaka	1	9	1	3	5	1	1	3	5	3	5	3	5	3	0	0	12	18	7	37	897	1	0	1	0	1	1	0	0	0	2	2	1	1	1	0	0	0	1	2	0	19
898	14	2	2	School	Banani B	1	Dhaka	1	9	1	5	0	1	1	5	0	5	5	5	5	0	0	5	16	6	11	33	898	0	0	2	0	0	2	2	1	0	2	0	2	0	2	1	0	1	1	1	2	14
899	14	2	2	School	Banani B	1	Dhaka	1	9	1	3	5	1	1	1	5	5	1	3	5	5	3	0	8	20	10	38	899	1	0	0	0	0	1	0	2	0	1	1	2	0	0	1	0	1	1	0	3	18
900	14	2	2	School	Banani B	1	Dhaka	1	9	1	5	5	1	3	1	0	1	3	0	5	1	3	0	11	11	5	27	900	1	0	2	0	1	2	0	0	0	1	3	3	0	1	2	0	0	1	1	0	17
901	14	2	2	School	Banani B	1	Dhaka	1	9	2	3	5	3	3	0	0	3	3	0	5	3	3	3	9	13	12	34	901	1	0	1	0	0	1	0	3	0	1	1	1	0	2	1	2	0	1	0	0	6
902	13	2	2	School	Banani B	1	Dhaka	1	9	1	3	0	3	1	1	1	1	3	0	1	3	1	0	7	4	8	19	902	0	0	1	1	1	2	0	3	0	1	1	1	1	0	1	1	0	2	0	1	26
903	13	2	2	School	Banani B	1	Dhaka	1	9	1	3	1	1	5	3	0	1	5	5	1	5	1	3	18	3	13	34	903	1	0	1	1	2	2	1	3	1	2	2	1	1	1	1	0	1	2	1	2	27
904	14	2	2	School	Banani B	1	Dhaka	1	9	1	3	1	5	1	1	3	0	1	1	1	3	3	0	6	5	12	23	904	1	2	2	1	2	1	1	2	2	1	2	2	1	1	0	2	2	0	0	2	13
905	14	2	2	School	Banani B	1	Dhaka	1	9	1	3	3	1	3	5	3	3	5	0	0	3	0	0	11	9	9	29	905	0	0	2	1	0	0	0	1	0	0	0	2	1	0	1	0	2	1	1	1	26
906	13	2	2	School	Banani B	1	Dhaka	1	9	1	3	1	1	5	3	0	1	5	5	1	5	1	3	18	3	13	34	906	1	0	1	1	2	2	1	3	1	2	2	1	1	1	1	0	1	2	1	2	21
907	14	2	2	School	Banani B	1	Dhaka	1	9	1	3	1	5	1	1	3	0	1	1	1	1	1	1	6	5	9	20	907	1	1	1	2	1	1	1	0	1	1	1	0	1	2	1	2	1	1	1	1	24
908	14	2	2	School	Banani B	1	Dhaka	1	9	1	3	3	3	3	5	3	5	3	3	1	1	3	3	12	12	15	39	908	1	1	1	2	1	1	1	1	1	2	1	1	1	1	2	1	1	1	1	2	17
909	14	2	2	School	Banani B	1	Dhaka	1	9	1	1	5	3	3	3	1	1	1	3	5	5	5	1	8	12	13	33	909	1	0	3	0	1	1	0	0	0	1	1	1	0	2	1	0	1	1	3	0	11
910	14	2	2	School	Banani B	1	Dhaka	1	9	1	0	0	0	0	0	0	0	0	0	0	0	0	0	0	0	0	0	910	1	1	1	0	0	1	0	0	0	1	1	1	1	1	0	0	1	1	0	0	20
911	14	2	2	School	Banani B	1	Dhaka	1	9	1	0	0	0	0	0	0	0	0	0	0	0	0	0	0	0	0	0	911	1	1	1	1	1	1	1	1	1	1	1	1	1	1	1	1	1	1	1	1	1
912	13	2	2	School	Banani B	1	Dhaka	1	9	1	0	0	0	0	0	0	0	0	0	0	0	0	0	0	0	0	0	912	0	0	1	0	0	0	0	0	0	0	0	0	0	0	0	0	0	0	0	0	5
913	14	2	2	School	Banani B	1	Dhaka	1	9	1	0	0	0	0	0	0	0	0	0	0	0	0	0	0	0	0	0	913	0	0	1	0	0	0	1	0	0	0	0	1	0	0	1	0	0	0	0	1	22
914	15	2	2	School	Banani B	1	Dhaka	1	9	1	3	3	1	3	3	1	5	0	5	3	0	0	1	11	12	4	27	914	1	1	1	2	1	1	1	0	1	1	1	2	1	2	1	2	1	1	1	1	26
915	14	2	2	School	Banani B	1	Dhaka	1	9	2	1	0	1	0	0	1	5	0	1	1	5	0	0	2	7	6	15	915	0	1	1	0	0	1	1	0	0	0	0	0	0	0	0	0	1	0	1	0	21
916	14	2	2	School	Banani B	1	Dhaka	1	9	4	3	0	0	1	0	5	5	3	3	3	0	5	0	10	13	5	28	916	0	0	2	0	0	2	0	2	0	0	0	1	0	0	0	0	0	2	1	2	13
917	14	2	2	School	Banani B	1	Dhaka	1	9	1	1	5	3	1	3	5	5	1	3	5	5	0	5	6	20	16	42	917	2	0	3	0	2	0	1	1	0	1	1	1	1	2	1	1	0	1	1	3	15
918	14	2	2	School	Banani B	1	Dhaka	1	9	1	1	5	0	1	3	0	5	3	3	5	1	0	0	8	15	4	27	918	1	1	1	0	0	1	0	1	0	1	1	1	1	2	1	0	0	1	2	0	24
919	14	2	2	School	Banani B	1	Dhaka	1	9	1	3	0	0	3	0	5	0	0	0	0	3	0	0	6	5	3	14	919	1	0	2	0	1	1	0	0	0	1	2	1	0	1	2	1	3	3	2	3	20
920	13	2	2	School	Banani B	1	Dhaka	1	9	1	0	0	3	0	0	0	5	0	0	0	3	1	0	0	5	7	12	921	1	2	0	0	0	1	2	0	1	1	1	2	2	1	1	1	0	2	1	1	8
921	14	2	2	School	Banani B	1	Dhaka	1	9	1	0	5	1	3	5	3	5	5	1	5	1	0	3	9	18	10	37	922	1	0	2	1	1	1	0	0	0	0	0	1	0	0	0	0	0	0	1	0	32
922	13	2	2	School	Banani B	1	Dhaka	1	9	1	0	5	3	1	1	0	5	5	1	5	0	0	5	7	15	9	31	923	2	1	3	1	1	3	0	3	1	3	1	3	2	1	0	0	2	1	1	3	22
923	14	2	2	School	Banani B	1	Dhaka	1	9	1	3	5	3	3	5	5	5	3	0	0	1	3	5	9	15	17	41	924	1	2	3	0	1	1	0	1	1	2	1	2	1	1	0	2	1	1	0	1	16
924	14	2	2	School	Banani B	1	Dhaka	1	9	1	3	5	3	3	1	0	5	1	0	5	5	0	0	7	15	9	31	925	1	2	1	1	1	0	1	0	0	1	1	2	0	0	1	0	1	1	2	0	20
925	14	2	2	School	Banani B	1	Dhaka	1	9	1	3	5	3	3	1	5	5	5	3	5	5	3	0	14	20	12	46	926	1	1	1	1	1	1	1	1	1	1	1	1	1	1	1	1	1	1	1	1	25
926	14	2	2	School	Banani B	1	Dhaka	1	9	1	3	1	3	3	3	3	3	3	3	3	3	3	3	12	10	15	37	927	2	3	2	2	1	1	1	2	1	2	2	0	1	1	1	0	0	0	0	3	13
927	14	2	2	School	Banani B	1	Dhaka	1	9	1	1	3	0	0	1	0	0	0	1	1	1	1	0	2	4	3	9	928	1	0	3	0	2	1	0	0	0	0	1	1	1	0	0	0	0	1	1	1	20
928	14	2	2	School	Banani B	1	Dhaka	1	9	1	3	3	0	1	0	1	5	3	0	1	3	0	0	7	10	3	20	929	2	0	1	3	3	0	2	0	0	1	3	3	0	0	3	2	1	1	1	0	10
929	15	2	2	School	Banani B	1	Dhaka	1	9	1	5	3	5	3	1	5	3	5	5	1	5	5	5	18	12	21	51	930	1	1	2	0	1	2	0	0	0	1	0	0	0	0	0	0	1	0	1	0	23
930	15	2	2	School	Banani B	1	Dhaka	1	9	1	3	5	0	3	1	1	5	5	0	5	5	1	0	11	16	7	34	931	2	0	1	0	0	1	0	1	0	3	2	1	1	2	1	0	1	1	2	1	26
931	14	2	2	School	Banani B	1	Dhaka	1	9	1	0	1	5	0	0	0	1	0	0	1	0	3	0	0	3	8	11	932	1	0	1	0	1	3	0	3	1	0	2	1	1	0	1	2	1	2	1	2	5
932	15	2	2	School	Banani B	1	Dhaka	1	9	1	3	5	3	1	1	3	1	0	3	5	3	5	3	8	14	17	39	933	1	0	0	0	0	1	0	1	0	0	1	0	0	0	0	0	1	0	0	0	5
933	16	2	2	School	Banani B	1	Dhaka	1	9	1	3	1	1	0	0	0	3	3	0	1	3	3	1	6	5	8	19	934	1	0	1	2	3	0	0	0	1	1	2	2	1	2	1	3	1	3	0	2	8
934	13	2	2	School	Banani B	1	Dhaka	1	9	1	3	5	5	1	1	1	1	1	3	1	5	0	1	8	8	16	32	935	1	0	2	0	0	0	0	1	1	0	0	0	0	0	0	0	0	0	0	0	20
935	15	2	2	School	Banani B	1	Dhaka	1	9	1	1	0	5	0	0	0	0	1	0	0	1	0	0	2	0	6	8	936	1	0	1	0	0	0	1	0	0	1	0	1	0	0	1	2	0	0	0	0	16
936	14	2	2	School	Banani B	1	Dhaka	1	9	1	1	5	1	0	0	0	5	0	0	5	5	0	0	1	15	6	22	937	1	0	1	0	0	2	0	0	0	1	2	1	1	0	1	0	0	1	2	3	20
937	13	2	2	School	Banani B	1	Dhaka	1	9	1	3	5	3	1	0	1	3	1	3	3	0	1	0	8	10	4	22	938	2	1	1	2	1	0	0	0	0	0	2	1	1	3	1	0	1	2	1	1	10
938	13	2	2	School	Banani B	1	Dhaka	1	9	1	3	1	5	3	1	3	3	5	5	3	5	1	1	16	10	13	39	939	1	1	2	0	1	2	0	0	0	1	0	0	0	0	0	0	1	0	1	0	14
939	14	2	2	School	Banani B	1	Dhaka	1	9	1	3	5	0	3	0	1	5	5	0	5	5	1	0	11	16	6	33	940	2	0	2	1	2	0	0	0	0	2	2	1	1	2	0	1	0	3	1	0	10
940	15	2	1	School	Banani B	1	Dhaka	1	9	1	5	1	5	5	0	1	5	3	0	1	3	5	0	13	7	13	33	940	0	0	0	1	0	2	0	0	0	2	1	1	0	3	0	0	2	2	0	0	7
941	14	2	1	School	Banani B	1	Dhaka	1	9	1	5	0	1	3	3	1	1	1	1	3	0	1	0	10	5	5	20	941	1	0	1	0	1	1	0	0	0	0	1	1	0	1	0	0	0	0	0	0	19
942	17	2	1	School	Banani B	1	Dhaka	1	9	1	3	0	5	0	1	3	3	0	0	3	3	0	0	3	9	9	21	942	1	0	0	0	1	2	0	0	0	0	1	1	0	1	1	0	0	1	1	0	22
943	14	2	1	School	Banani B	1	Dhaka	1	9	1	3	5	3	3	1	5	5	3	3	5	1	5	1	12	20	11	43	943	2	0	2	1	0	1	0	0	0	1	1	1	1	1	1	1	0	3	3	0	18
944	14	2	1	School	Banani B	1	Dhaka	1	10	1	1	3	0	1	0	5	0	5	3	1	0	0	0	10	9	0	19	944	1	0	0	0	1	1	0	0	0	1	2	1	3	3	0	1	0	1	3	0	12
945	14	2	1	School	Banani B	1	Dhaka	1	10	1	3	5	1	0	1	5	1	5	5	3	1	3	0	13	14	6	33	945	1	1	0	0	1	2	0	0	0	1	2	1	1	1	0	0	0	1	0	0	15
946	14	2	1	School	Banani B	1	Dhaka	1	10	1	1	3	5	0	1	3	1	1	0	0	0	3	0	2	7	9	18	946	1	0	2	0	1	1	0	0	0	1	1	1	1	2	1	0	0	1	1	1	20
947	15	2	1	School	Banani B	1	Dhaka	1	10	1	5	5	3	3	3	3	5	5	1	3	1	1	1	14	16	9	39	947	3	0	1	0	1	2	0	0	0	3	1	2	1	1	1	2	1	2	1	0	22
948	15	2	1	School	Banani B	1	Dhaka	1	10	2	1	0	5	0	0	0	5	0	3	5	5	0	1	4	10	11	25	948	0	1	0	0	2	0	0	0	0	0	0	0	0	0	0	2	0	2	0	0	24
949	15	2	1	School	Banani B	1	Dhaka	1	10	1	3	5	0	3	3	1	0	1	1	5	3	5	1	8	11	12	31	949	1	0	2	1	1	2	0	2	0	1	1	2	3	3	0	0	1	2	0	0	27
950	14	2	1	School	Banani B	1	Dhaka	1	10	1	0	3	1	3	0	3	5	1	3	5	1	5	0	7	16	7	20	950	1	2	1	2	1	3	0	0	0	1	1	2	3	1	0	0	0	1	0	1	22
951	14	2	1	School	Banani B	1	Dhaka	1	10	1	1	5	5	5	3	0	0	3	0	5	0	0	3	9	10	11	30	951	1	0	2	3	3	0	0	1	0	1	2	1	1	2	0	2	1	1	1	0	16
952	15	2	2	School	Banani B	1	Dhaka	1	10	1	5	5	5	0	0	0	5	0	0	5	5	0	0	5	15	15	35	952	1	0	3	3	3	3	0	1	0	1	1	2	0	3	0	0	0	3	2	1	5
953	15	2	1	School	Banani B	1	Dhaka	1	10	1	0	1	0	0	0	0	0	1	0	3	0	3	0	1	4	3	8	953	1	0	1	0	1	0	0	0	0	0	0	0	0	0	0	0	0	1	1	0	15
955	14	2	1	School	Banani B	1	Dhaka	1	0	1	1	5	3	1	0	3	1	3	0	5	3	1	0	5	14	7	26	955	1	1	0	2	1	1	0	0	0	2	0	1	1	0	1	0	1	2	1	1	28
956	15	2	1	School	Banani B	1	Dhaka	1	9	1	0	1	3	1	1	0	3	1	0	1	0	3	0	2	5	7	14	956	1	0	1	2	1	2	0	0	0	1	1	2	1	2	0	0	0	1	0	0	18
957	14	2	1	School	Banani B	1	Dhaka	1	9	1	3	5	5	0	0	1	5	3	3	5	3	3	0	9	16	11	36	957	1	1	1	1	0	0	2	2	3	3	2	2	2	0	2	2	1	2	1	0	18
958	14	2	1	School	Banani B	1	Dhaka	1	9	1	0	3	3	1	0	1	5	1	1	3	3	0	0	3	12	6	21	958	1	0	1	2	1	2	0	0	0	1	1	2	0	2	1	1	0	2	0	1	19
959	15	2	1	School	Banani B	1	Dhaka	1	9	1	1	5	5	0	1	5	5	1	0	5	3	0	3	2	20	12	34	959	1	1	2	1	2	1	0	0	1	1	1	1	1	1	1	0	0	1	1	1	18
960	14	2	1	School	Banani B	1	Dhaka	1	9	1	5	1	3	1	0	5	5	5	0	5	1	0	0	11	16	4	31	960	1	1	2	2	2	1	0	0	0	0	1	2	0	2	0	0	0	2	1	2	10
961	14	2	1	School	Banani B	1	Dhaka	1	9	1	3	3	1	3	3	0	3	1	0	3	0	5	0	10	9	8	27	961	1	0	0	0	0	0	0	1	0	1	1	1	0	1	0	1	1	1	0	1	12
962	14	2	1	School	Banani B	1	Dhaka	1	9	1	1	5	3	0	0	3	5	3	3	1	1	0	1	7	14	4	25	962	0	0	1	1	0	0	0	1	1	0	0	1	0	2	1	0	1	1	0	2	0
963	13	2	1	School	Banani B	1	Dhaka	1	9	1	0	0	0	0	0	0	0	0	0	0	0	0	0	0	0	0	0	963	0	0	0	0	0	0	0	0	0	0	0	0	0	0	0	0	0	0	0	0	22
964	13	2	1	School	Banani B	1	Dhaka	1	9	1	3	0	1	5	5	1	0	5	5	0	5	1	5	18	1	17	36	964	1	2	1	2	0	0	1	1	2	1	0	1	2	1	2	1	0	1	0	3	15
965	14	2	1	School	Banani B	1	Dhaka	1	9	1	1	3	0	0	5	1	5	3	0	5	0	3	0	3	16	8	27	965	1	0	0	0	1	0	0	1	0	1	1	2	1	2	1	1	0	2	1	0	10
966	15	2	1	School	Banani B	1	Dhaka	1	9	1	1	5	3	3	5	3	0	3	3	5	3	3	0	9	13	14	36	966	1	0	1	1	1	1	0	1	0	1	1	1	1	2	1	0	1	2	2	0	19
967	15	2	1	School	Banani B	1	Dhaka	1	9	1	5	3	5	3	3	0	0	0	5	0	5	0	0	13	1	13	27	967	0	0	3	0	1	1	0	2	1	1	2	1	1	1	2	0	0	1	0	2	7
968	15	2	1	School	Banani B	1	Dhaka	1	9	1	3	3	3	1	0	0	0	1	1	1	5	5	0	6	4	13	23	968	1	0	0	0	0	1	0	0	0	1	0	1	1	0	0	0	0	1	1	0	20
969	15	2	1	School	Banani B	1	Dhaka	1	9	1	5	3	5	3	5	3	3	5	3	1	1	1	3	16	10	15	41	969	2	0	1	1	2	1	1	0	0	1	1	2	1	2	1	1	0	2	1	0	18
970	15	2	1	School	Banani B	1	Dhaka	1	9	1	0	5	3	3	1	3	5	3	3	5	1	0	0	9	18	5	32	970	1	1	2	1	2	2	0	0	0	0	1	2	1	0	1	0	1	1	1	1	25
971	14	2	2	support_	NIMH	2	Dhaka	1	9	1	0	0	0	0	0	0	0	0	0	0	0	0	0	0	0	0	0	971	0	0	0	0	0	0	0	0	0	0	0	0	1	0	0	0	0	0	0	0	21
972	13	2	1	support_	NIMH	2	Dhaka	1	9	1	3	3	3	0	3	5	5	3	5	5	0	0	5	11	18	11	40	972	2	0	3	1	0	3	0	3	0	0	0	0	0	0	1	1	0	3	1	3	21
973	15	2	1	support_	NIMH	2	Dhaka	1	8	1	1	3	3	3	5	0	5	0	5	5	5	0	0	9	13	13	35	973	1	1	3	0	0	1	0	0	0	1	1	2	2	2	1	1	0	0	2	3	26
974	10	1	1	support_	NIMH	2	Dhaka	1	0	1	3	5	0	0	5	0	5	0	0	5	0	0	0	3	15	5	23	974	0	0		0	0	0	0	0	0	0											2
975	13	2	2	suport_s	Care-BD,	2	Dhaka	1	9	1	5	5	5	1	1	1	1	1	3	1	3	1	5	10	8	15	33	975	1	1	3	2	1	2	1	0	0	3	0	1	0	1	0	1	0	1	2	1	11
976	13	2	2	suport_s	Care-BD,	2	Dhaka	2	3	1	3	0	1	5	3	1	1	5	5	1	1	0	0	18	3	5	26	976	0	2	0	1	1	1	1	2	0	0	3	1	1	2	0	0	0	0	0	0	18
977	15	2	2	suport_s	Care-BD,	2	Dhaka	2	0	1	0	0	0	0	0	0	0	0	0	0	0	0	0	0	0	0	0	977	1	1	1	0	2	1	2	3	0	0	0	1	1	1	0	0	2	1	1	3	9
978	16	2	2	suport_s	Care-BD,	2	Dhaka	2	0	1	0	0	0	0	0	0	0	0	0	0	0	0	0	0	0	0	0	978	1	0	0	1	1	0	1	0	2	0	0	0	1	1	0	0	1	0	0	0	35
979	15	2	2	suport_s	Care-BD,	2	Dhaka	2	0	1	1	3	0	1	1	1	0	5	1	1	1	1	0	8	5	3	16	979	0	1	0	0	1	1	3	2	3	3	3	3	0	0	0	3	3	3	3	3	26
980	15	2	2	suport_s	Care-BD,	2	Dhaka	2	0	1	3	0	1	0	1	5	3	5	3	1	3	5	0	11	9	10	30	980	0	0		0	0	0	0	0	0	0											0
981	11	1	2	suport_s	Care-BD,	2	Dhaka	2	0	1	0	0	0	0	0	0	0	0	0	0	0	0	0	0	0	0	0	981	0	0		0	0	0	0	0	0	0											37
982	17	2	2	suport_s	Care-BD,	2	Dhaka	2	0	1	3	5	1	5	3	1	3	5	3	5	1	3	1	16	14	9	39	982	1	2	1	0	1	1	2	0	0	3	1	2	2	2	1	1	1	2	1	2	24
983	16	2	2	suport_s	Care-BD,	2	Dhaka	2	0	1	3	1	0	1	3	1	0	1	3	1	0	5	0	8	3	8	19	983	1	0	0	2	0	1	2	1	0	3	2	3	1	0	2	1	0	1	3	1	27
984	12	1	2	suport_s	Care-BD,	2	Dhaka	2	0	1	0	0	0	0	0	0	0	0	0	0	0	0	0	0	0	0	0	984	2	1	1	0	1	1	0	0	1	1	1	1	1	1	1	1	1	1	1	1	22
985	13	2	2	suport_s	Care-BD,	2	Dhaka	2	0	1	3	0	1	5	3	1	1	5	5	1	1	0	0	18	3	5	26	985	0	2	0	0	1	0	0	0	2	3	3	2	0	3	1	1	1	1	1	1	25
986	17	2	2	suport_s	Care-BD,	2	Dhaka	2	0	1	0	3	0	3	3	0	0	3	3	5	3	3	0	9	8	9	26	986	2	2	2	0	0	2	2	2	2	2	1	2	3	1	2	0	0	0	1	1	30
987	15	2	2	suport_s	Care-BD,	2	Dhaka	2	0	1	3	1	1	0	3	3	3	3	1	3	1	3	1	7	10	9	26	987	1	2	1	1	1	2	2	0	2	2	2	1	1	1	2	1	2	3	2	1	22
988	16	2	2	suport_s	Care-BD,	2	Dhaka	2	0	1	1	0	3	5	3	5	3	1	0	0	5	1	3	7	8	15	30	988	0	0	1	2	3	0	1	3	0	0	2	0	1	3	1	2	0	1	2	0	32
989	13	2	2	suport_s	Care-BD,	2	Dhaka	2	0	1	3	1	0	1	3	1	3	5	3	5	3	5	3	12	10	14	36	989	1	1	1	1	1	1	2	0	0	2	1	2	0	2	2	1	2	1	2	2	42
990	15	2	2	suport_s	Care-BD,	2	Dhaka	2	0	1	0	3	0	5	5	5	0	3	0	5	3	3	0	8	13	11	32	990	0	1	2	2	0	1	2	2	1	1	2	3	3	3	3	3	1	2	0	0	12
991	14	2	2	suport_s	Care-BD,	2	Dhaka	2	0	1	5	5	5	3	5	5	5	5	5	3	5	1	5	18	18	21	57	991	0	3	3	0	3	3	3	0	3	3	3	3	0	0	3	3	3	3	0	3	40
992	14	2	2	suport_s	Care-BD,	2	Dhaka	2	0	1	5	5	0	5	3	3	5	1	1	5	5	5	0	12	18	13	43	992	0	3	3	0	3	1	2	3	1	3	3	2	2	3	1	3	1	3	0	3	31
993	15	2	2	suport_s	Care-BD,	2	Dhaka	2	0	1	0	5	0	3	0	5	0	3	0	5	3	3	0	6	15	6	27	993	1	0	0	0	1	1	0	0	0	1	1	1	0	1	0	1	0	0	1	3	22
994	17	2	2	suport_s	Care-BD,	2	Dhaka	2	0	1	0	3	0	0	3	5	0	3	0	5	3	3	3	3	13	12	28	994	1	1	1	0	0	0	0	1	0	0	1	3	0	3	1	1	1	2	3	3	27
995	17	2	2	suport_s	Care-BD,	2	Dhaka	2	0	1	3	5	1	5	3	3	5	3	1	5	3	3	3	12	18	13	43	995	1	3	2	1	0	1	0	1	1	2	3	1	3	2	1	0	2	1	2	0	19
996	17	2	2	suport_s	Care-BD,	2	Dhaka	2	0	1	0	0	0	0	0	0	0	0	0	0	0	0	0	0	0	0	0	996	1	0	1	1	1	0	0	2	0	0	2	2	0	2	2	0	2	0	0	3	33
997	17	2	2	suport_s	Care-BD,	2	Dhaka	2	0	1	3	1	5	1	5	5	3	3	5	1	0	0	5	12	10	15	37	997	1	2	2	2	0	1	2	0	1	3	2	3	2	1	1	3	2	2	1	2	36
998	13	2	2	suport_s	Care-BD,	2	Dhaka	2	0	1	5	5	3	3	5	1	5	5	5	0	3	5	5	18	11	21	50	998	1	1	3	3	2	0	0	0	3	2	2	0	2	1	2	1	3	1	3	1	37
999	13	2	2	suport_s	Care-BD,	2	Dhaka	2	0	1	5	5	3	1	5	3	0	3	3	0	0	3	5	12	8	16	36	999	1	2	3	0	3	3	1	0	2	3	1	2	1	3	2	0	2	3	2	3	32
1000	15	2	2	support_	MSP-VAW,	2	Dhaka	2	0	1	3	1	0	5	5	5	3	5	5	5	0	5	3	18	14	13	45	1000	3	3	1	3	1	1	1	0	1	1	3	2	3	2	2	0	3	3	0	3	35
1001	13	2	2	support_	MSP-VAW,	2	Dhaka	2	4	1	5	5	5	0	0	1	5	5	5	5	1	3	5	15	16	14	45	1001	0	3	0	1	0	0	0	3	3	0	2	3	0	3	3	0	3	3	2	3	0
1002	10	1	2	support_	MSP-VAW,	2	Dhaka	2	2	1	0	3	0	3	3	5	5	1	0	5	0	3	1	4	18	7	29	1002	2	1	1	0	0	3	1	3	0	1	2	2	0	3	2	0	2	1	2	2	44
1003	10	1	1	support_	NIMH	2	Dhaka	1	5	1	5	1	3	5	3	0	0	1	3	3	0	1	0	14	4	7	25	1003	0	0	1	0	1	0	0	2	0	1	0	0	2	0	1	1	2	1	0	2	0
1004	10	1	1	support_	NIMH	2	Dhaka	1	5	1	1	0	0	0	0	0	0	1	0	0	0	0	3	2	0	3	5	1004	0	0	0	0	0	0	0	0	0	0	0	0	0	0	0	0	0	0	0	0	45
1005	13	2	2	support_	NIMH	2	Dhaka	1	5	1	1	5	5	0	1	5	5	3	0	5	3	0	0	4	20	11	35	1005	0	0	0	0	0	1	0	0	0	3	1	0	1	0	0	0	1	1	0	3	23
1007	10	1	1	School	Nimtoli	1	Dhaka	1	4	1	3	1	0	0	1	5	3	1	0	3	0	5	1	4	12	7	23	1007	1	0	2	0	2	1	2	2	1	2	2	1	2	2	1	3	0	2	1	0	3
1008	9	1	2	School	Nimtoli	1	Dhaka	1	3	1	5	3	0	0	1	5	5	3	0	5	0	0	0	8	18	1	27	1008	0	0	0	0	0	0	0	0	0	0	0	0	0	0	0	0	0	0	0	3	7
1009	9	1	1	School	Nimtoli	1	Dhaka	1	3	1	3	0	0	3	1	3	1	0	3	0	3	3	3	9	4	10	23	1009	1	0	0	0	0	0	1	1	0	0	0	1	1	0	0	0	1	0	0	1	8
1010	10	1	1	School	Nimtoli	1	Dhaka	1	5	1	3	0	0	0	1	3	3	3	3	1	0	0	3	9	7	4	20	1010	1	0	0	0	0	1	0	0	0	2	0	1	1	0	0	0	1	1	0	0	11
1011	12	1	1	School	Nimtoli	1	Dhaka	1	5	1	1	0	0	0	1	1	0	3	3	3	0	0	3	7	4	4	15	1011	1	0	0	0	0	1	1	0	0	1	0	2	0	0	0	2	1	1	0	0	14
1012	9	1	1	School	Nimtoli	1	Dhaka	1	4	1	1	0	0	0	1	3	0	1	1	1	0	0	1	3	4	2	9	1012	1	0	0	0	0	1	1	0	0	1	0	1	2	0	0	2	1	1	0	0	12
1013	12	1	1	School	Nimtoli	1	Dhaka	1	4	1	1	5	0	1	1	3	0	1	0	1	1	0	1	3	9	3	15	1013	1	0	0	0	0	0	0	0	0	1	1	2	1	2	1	1	1	1	1	1	14
1014	11	1	1	School	Nimtoli	1	Dhaka	1	4	1	3	0	0	0	0	3	3	3	3	0	0	5	0	9	6	5	20	1014	1	0	0	0	0	1	1	0	0	1	0	1	3	1	1	1	1	0	0	0	14
1015	9	1	2	School	Nimtoli	1	Dhaka	1	4	1	3	1	0	1	1	0	1	3	3	1	0	0	0	10	3	1	14	1015	1	0	2	0	0	0	1	2	0	1	0	1	1	1	0	0	1	1	0	2	13
1016	9	1	2	School	Nimtoli	1	Dhaka	1	4	1	3	1	0	0	3	3	0	3	3	1	0	0	0	9	5	3	17	1016	1	0	1	0	1	0	1	0	0	1	1	3	1	0	1	1	0	0	1	0	13
1017	10	1	2	School	Nimtoli	1	Dhaka	1	4	1	3	0	3	3	1	5	3	3	0	3	0	0	0	9	11	4	24	1017	1	1	1	0	0	1	1	0	0	1	1	1	0	0	1	2	0	1	1	0	9
1018	9	1	2	School	Nimtoli	1	Dhaka	1	4	1	3	1	0	0	5	0	0	3	0	0	1	0	0	6	4	6	16	1018	0	0	3	0	0	0	0	1	0	0	0	2	0	0	0	1	1	1	0	0	14
1019	12	1	1	School	Nimtoli	1	Dhaka	1	5	1	3	0	0	0	5	0	3	1	5	3	1	0	0	9	6	6	21	1019	0	1	0	0	0	1	2	0	0	1	1	2	0	0	1	2	1	2	0	0	19
1020	9	1	1	School	Nimtoli	1	Dhaka	1	3	1	3	0	0	0	1	0	0	3	3	0	0	0	3	9	0	4	13	1020	0	1	0	0	1	1	1	0	0	1	0	1	0	2	0	2	1	1	2	0	16
1021	10	1	1	School	Nimtoli	1	Dhaka	1	4	1	3	0	0	1	1	5	1	1	5	5	3	1	0	10	11	5	26	1021	1	0	0	0	1	1	1	0	0	0	1	2	1	2	1	1	2	1	1	0	30
1022	14	2	1	School	Nimtoli	1	Dhaka	1	4	1	1	1	1	3	3	3	1	3	1	1	3	1	0	8	6	8	22	1022	1	1	1	1	1	1	2	1	1	1	1	2	0	1	1	0	0	1	0	2	8
1023	11	1	2	School	Nimtoli	1	Dhaka	1	4	1	3	0	0	3	1	5	5	1	3	5	1	0	3	10	15	5	30	1023	2	0	1	3	2	1	1	3	3	3	1	1	1	1	1	1	1	2	1	1	18
1024	9	1	2	School	Nimtoli	1	Dhaka	1	4	1	3	0	0	3	0	1	1	0	0	3	0	1	0	6	5	1	12	1024	0	0	0	2	2	0	2	0	0	0	2	2	0	2	0	2	2	2	0	0	28
1025	9	1	2	School	Nimtoli	1	Dhaka	1	4	1	3	3	0	0	1	5	3	0	1	0	0	1	0	4	11	2	17	1025	1	0	0	3	1	0	2	0	3	3	2	3	2	1	0	0	3	1	3	0	3
1026	9	1	2	School	Nimtoli	1	Dhaka	1	4	1	3	1	0	1	0	3	0	1	3	3	0	0	0	8	7	0	15	1026	0	0	0	0	0	1	0	0	0	0	0	0	0	0	0	0	0	1	1	0	12
1027	13	2	1	School	Nimtoli	1	Dhaka	1	5	1	3	0	0	0	0	3	0	3	0	0	0	0	0	6	3	0	9	1027	0	0	0	0	0	1	0	0	0	0	1	2	0	0	0	2	1	1	0	0	15
1028	9	1	1	School	Nimtoli	1	Dhaka	1	3	1	3	0	0	0	0	3	3	3	0	0	3	0	3	6	6	6	18	1028	1	1	1	0	0	0	0	0	0	0	1	2	0	0	2	0	1	1	2	0	19
1029	9	1	1	School	Nimtoli	1	Dhaka	1	4	1	1	1	3	3	0	3	0	1	3	0	1	3	3	8	4	10	22	1029	1	1	0	0	1	1	0	1	0	1	2	0	1	2	2	1	2	1	1	1	13
1030	10	1	2	School	Nimtoli	1	Dhaka	1	4	1	1	3	1	3	0	1	3	3	0	1	3	1	0	7	8	8	23	1030	1	1	0	0	1	1	0	1	1	1	0	0	1	1	1	0	0	1	1	1	22
1031	9	1	2	School	Nimtoli	1	Dhaka	1	4	1	3	0	0	1	1	3	0	5	1	5	1	1	0	10	8	3	21	1031	0	1	0	1	2	1	0	0	0	2	2	1	1	2	1	1	2	1	2	2	16
1032	10	1	2	School	Nimtoli	1	Dhaka	1	4	1	3	0	0	0	0	0	1	3	0	1	5	3	0	6	2	8	16	1032	0	1	0	2	0	1	3	2	0	1	0	1	3	0	0	1	0	1	0	0	11
1033	11	1	2	School	Nimtoli	1	Dhaka	1	4	1	3	0	0	3	0	0	1	1	0	0	1	1	0	6	2	2	10	1033	1	1	1	1	1	0	0	1	1	1	0	0	0	0	0	1	0	1	0	1	14
1034	10	1	2	School	Nimtoli	1	Dhaka	1	4	1	3	0	0	1	0	0	3	1	0	0	1	3	0	5	3	4	12	1034	1	1	0	1	0	0	3	2	0	0	1	0	0	0	0	0	3	0	1	1	14
1035	11	1	2	School	Nimtoli	1	Dhaka	1	3	1	1	1	3	3	0	3	5	1	0	1	0	1	3	4	10	7	21	1035	1	0	1	3	0	1	0	1	1	0	0	1	0	1	0	0	0	1	0	3	14
1036	11	1	2	School	Nimtoli	1	Dhaka	1	5	1	1	3	0	3	0	3	5	1	3	1	3	0	3	7	13	6	26	1036	1	0	1	3	0	1	0	1	1	0	0	1	0	0	1	0	0	1	0	3	23
1037	10	1	2	School	Nimtoli	1	Dhaka	1	4	1	3	1	5	3	3	3	3	1	3	3	3	5	3	10	10	19	39	1037	1	1	1	1	1	1	1	2	2	1	1	1	1	1	1	1	1	1	1	2	9
1038	10	1	2	School	Nimtoli	1	Dhaka	1	4	1	3	0	0	3	3	0	1	0	0	0	0	0	0	6	1	3	10	1038	0	0	1	0	0	1	0	0	0	1	0	1	1	0	0	1	1	0	1	1	10
1039	12	1	2	School	Nimtoli	1	Dhaka	1	4	1	3	1	0	0	0	3	1	1	1	3	1	5	3	3	7	9	19	1039	0	1	2	0	0	1	0	2	0	1	1	2	0	1	0	0	1	1	2	0	23
1040	10	1	2	School	Nimtoli	1	Dhaka	1	4	1	3	0	0	3	0	0	0	3	0	0	0	0	0	9	0	0	9	1040	1	0	2	0	0	0	0	1	1	0	1	0	0	1	0	1	0	1	1	0	12
1041	9	1	2	School	Nimtoli	1	Dhaka	1	5	1	3	5	0	0	1	3	3	0	0	0	0	1	0	3	11	2	16	1041	0	1	1	0	0	0	1	0	0	0	0	1	0	0	0	0	1	3	1	3	19
1042	9	1	2	School	Nimtoli	1	Dhaka	1	3	1	5	1	3	3	1	0	3	1	5	0	1	3	5	14	4	13	31	1042	1	2	1	2	1	1	0	0	1	0	0	1	2	1	2	1	2	0	1	0	27
1043	10	1	2	School	Nimtoli	1	Dhaka	1	4	1	3	0	0	5	5	0	0	1	3	1	3	5	3	12	1	16	29	1043	1	1	1	0	2	2	0	0	0	3	1	3	3	0	1	3	3	0	2	1	8
1044	11	1	2	School	Nimtoli	1	Dhaka	1	3	1	3	0	0	0	0	1	0	0	0	1	0	0	0	3	2	0	5	1044	0	0	1	0	0	0	1	0	0	1	0	0	2	0	0	1	0	0	1	1	29
1045	10	1	2	School	Nimtoli	1	Dhaka	1	5	1	1	3	1	5	0	3	5	5	1	5	3	0	1	12	16	5	33	1045	0	1	2	0	1	0	3	0	1	2	3	1	1	2	3	1	3	2	3	0	13
1046	10	1	2	School	Nimtoli	1	Dhaka	1	3	1	3	5	0	0	1	0	3	5	1	1	0	0	0	9	9	1	19	1046	0	0	1	0	0	1	0	1	1	2	0	1	0	1	0	0	2	0	3	0	18
1047	11	1	2	School	Nimtoli	1	Dhaka	1	5	1	5	5	0	3	5	5	3	3	0	5	1	3	1	11	18	10	39	1047	1	0	1	0	2	2	0	3	2	0	1	0	1	1	0	0	1	0	0	3	1
1048	9	1	2	School	Nimtoli	1	Dhaka	1	3	1	0	1	0	0	0	5	5	0	0	5	0	0	0	0	16	0	16	1048	0	0	0	0	0	0	0	0	0	0	0	0	0	0	0	0	0	0	0	1	19
1049	14	2	2	School	Nimtoli	1	Dhaka	1	9	1	3	5	5	5	3	0	5	1	1	5	5	0	0	10	15	13	38	1049	2	1	2	2	2	0	0	0	0	2	2	2	2	0	2	1	1	2	0	0	18
1050	15	2	2	School	Sunnydal	1	Dhaka	1	9	1	5	5	5	5	0	5	5	5	5	5	0	3	3	20	20	11	51	1050	3	0	0	0	0	3	1	1	0	1	3	1	3	1	1	0	1	3	3	0	13
1051	14	2	1	School	Sunnydal	1	Dhaka	1	7	1	1	5	1	3	1	5	5	1	1	5	1	1	3	6	20	7	33	1051	1	2	0	1	1	0	1	0	0	1	0	2	3	0	0	1	0	3	2	0	5
1052	14	2	2	School	Sunnydal	1	Dhaka	1	8	1	0	3	1	0	0	1	1	3	0	3	3	0	0	3	8	4	15	1052	1	0	1	1	1	0	0	0	1	0	0	0	0	0	0	0	0	0	0	0	8
1053	14	2	2	School	Sunnydal	1	Dhaka	1	8	1	1	3	3	0	0	0	3	0	0	5	5	0	0	1	11	8	20	1053	1	1	0	0	0	0	0	0	0	1	0	2	0	1	0	1	1	0	0	0	20
1054	14	2	1	School	Sunnydal	1	Dhaka	1	8	1	3	5	5	3	5	3	5	3	1	5	3	1	0	10	18	14	42	1054	1	0	2	0	2	1	0	1	1	2	2	1	1	1	1	1	1	1	1	0	20
1055	13	2	1	School	Sunnydal	1	Dhaka	1	8	1	3	1	0	1	1	5	5	5	3	3	3	1	0	12	14	5	31	1055	1	0	0	2	1	1	0	1	0	1	1	2	1	2	0	0	1	3	1	2	15
1056	13	2	2	School	Sunnydal	1	Dhaka	1	8	1	1	3	1	3	0	3	3	1	3	0	3	3	0	8	9	7	24	1056	1	0	1	0	2	1	0	2	0	1	0	0	0	1	0	1	1	0	2	2	19
1057	13	2	2	School	Sunnydal	1	Dhaka	1	8	1	1	3	3	1	1	3	5	1	0	3	5	0	0	3	14	9	26	1057	1	2	2	0	1	2	0	2	1	1	1	1	2	1	1	0	0	1	0	0	33
1058	13	2	2	School	Sunnydal	1	Dhaka	1	7	1	5	5	5	5	5	1	5	5	5	5	5	1	5	20	16	21	57	1058	3	3	0	0	1	3	3	0	0	3	3	2	0	3	1	2	2	2	2	0	28
1059	15	2	2	School	Sunnydal	1	Dhaka	1	9	1	1	3	1	0	0	0	0	0	0	1	0	0	0	1	4	1	6	1059	0	1	0	3	1	0	3	0	0	0	0	0	2	0	0	0	0	0	0	3	27
1060	15	2	1	School	Sunnydal	1	Dhaka	1	8	1	5	0	5	5	5	1	5	5	5	0	5	3	0	20	6	18	44	1060	2	2	1	1	2	0	2	0	1	1	2	1	1	3	1	1	2	3	1	0	13
1061	15	2	1	School	Sunnydal	1	Dhaka	1	9	1	5	5	1	3	0	0	3	3	1	5	1	0	5	12	13	7	32	1061	1	1	0	0	0	0	0	0	0	2	1	1	2	1	0	0	0	2	2	0	1
1062	15	2	1	School	Sunnydal	1	Dhaka	1	9	1	1	3	0	0	0	0	0	3	0	0	1	0	0	4	3	1	8	1062	0	1	0	0	0	0	0	0	0	0	0	0	0	0	0	0	0	0	0	0	2
1063	14	2	1	School	Sunnydal	1	Dhaka	1	9	1	5	3	3	5	0	0	5	5	5	3	3	5	1	20	11	12	43	1063	3	0	1	0	1	2	0	2	1	1	3	2	0	3	3	1	0	1	2	2	20
1064	16	2	1	School	Sunnydal	1	Dhaka	1	9	1	0	0	1	0	0	0	0	1	0	0	1	0	3	1	0	5	6	1064	0	0	1	0	1	0	0	0	0	0	0	0	0	0	0	0	0	0	0	0	18
1065	12	1	2	suport_s	ACD, Sha	2	Rajshahi	0	0	1	5	5	3	0	0	5	0	0	0	5	5	0	0	5	15	8	28	1065	3	3	3	3	0	0	1	3	0	3	2	3	3	3	3	0	2	3	0	3	41
1066	12	1	1	suport_s	ACD, Sha	2	Rajshahi	0	0	1	1	5	1	1	0	5	0	1	1	0	5	0	5	4	10	6	20	1066	3	3	3	2	0	1	1	0	0	3	3	3	3	3	3	3	1	3	0	3	39
1067	14	2	2	suport_s	ACD, Sha	2	Rajshahi	0	0	1	5	3	5	5	0	0	5	5	5	0	5	5	5	20	8	20	48	1067	3	3	0	0	0	0	1	1	0	3	3	3	3	3	3	1	3	3	3	3	42
1068	11	1	2	suport_s	ACD, Sha	2	Rajshahi	1	3	1	5	5	5	1	1	0	0	5	3	3	1	5	0	14	8	12	34	1068	3	3	3	0	0	3	3	0	3	3	3	1	1	3	2	3	3	3	3	2	10
1069	9	1	2	suport_s	ACD, Sha	2	Rajshahi	1	3	1	3	1	0	5	0	1	1	5	0	1	0	0	0	13	4	0	17	1069	1	1	0	0	0	1	1	0	0	1	0	0	1	0	2	1	0	1	0	0	13
1070	9	1	2	suport_s	ACD, Sha	2	Rajshahi	1	4	1	5	5	3	0	3	3	5	1	0	5	0	3	0	6	18	9	33	1070	1	0	0	0	2	1	0	1	0	0	1	1	1	1	0	1	0	1	1	1	15
1071	9	1	2	suport_s	ACD, Sha	2	Rajshahi	1	3	1	3	5	1	5	0	5	5	3	3	0	0	3	0	14	15	3	32	1071	1	0	0	0	0	1	1	0	0	1	1	2	1	1	1	1	1	2	0	1	22
1072	17	2	2	suport_s	ACD, Sha	2	Rajshahi	4	0	1	3	3	3	0	5	5	1	3	3	0	0	5	1	9	9	14	32	1072	1	0	0	0	0	2	0	0	0	1	3	2	3	0	0	0	0	0	1	1	22
1073	16	2	2	suport_s	ACD, Sha	2	Rajshahi	1	10	1	3	5	3	5	3	5	5	3	3	5	5	0	0	14	20	11	45	1073	2	0	0	0	1	0	2	0	0	2	2	2	2	3	0	2	2	3	3	0	26
1074	15	2	2	suport_s	ACD, Sha	2	Rajshahi	1	10	1	3	5	3	1	3	3	5	3	1	5	3	5	3	8	18	15	41	1074	2	1	1	1	1	2	0	2	1	2	1	2	0	3	1	1	1	1	3	0	26
1075	17	2	2	suport_s	ACD, Sha	2	Rajshahi	1	12	1	5	5	3	5	5	5	5	5	5	5	5	3	5	20	20	19	59	1075	2	1	3	1	2	1	1	1	1	1	2	2	1	1	0	0	1	2	1	2	21
1076	14	2	1	suport_s	ACD, Sha	2	Rajshahi	1	10	1	3	3	3	3	1	1	3	3	3	3	3	3	1	12	10	11	33	1076	1	1	1	1	1	3	1	0	1	1	1	1	1	1	1	1	1	1	3	1	26
1077	10	1	1	suport_s	ACD, Sha	2	Rajshahi	1	5	1	3	0	3	1	0	1	5	3	3	5	3	0	0	10	11	6	27	1077	1	1	0	1	0	1	0	1	0	3	1	1	2	0	0	0	2	2	3	3	12
1078	15	2	1	suport_s	ACD, Sha	2	Rajshahi	1	8	1	1	3	0	5	5	1	1	5	3	0	0	1	0	14	5	6	25	1078	1	0	0	1	0	0	1	3	2	1	2	1	1	0	0	1	2	1	2	2	17
1079	12	1	1	suport_s	ACD, Sha	2	Rajshahi	1	0	1	1	5	0	5	0	0	0	5	5	5	0	0	0	16	10	0	26	1079	3	3	3	3	3	1	3	0	0	0	0	0	3	0	1	3	0	0	0	0	28
1080	12	1	1	suport_s	ACD, Sha	2	Rajshahi	4	0	1	5	5	0	5	0	5	3	5	3	5	0	3	3	18	18	6	42	1080	2	1	0	0	0	0	0	2	0	0	0	0	0	0	0	3	0	0	0	0	25
1081	15	2	2	suport_s	ACD, Sha	2	Rajshahi	4	3	1	5	5	1	3	0	5	0	5	3	5	5	1	0	16	15	6	37	1081	3	2	1	0	0	2	2	3	0	0	0	0	0	2	0	3	0	1	0	3	29
1082	11	1	1	suport_s	ACD, Het	2	Rajshahi	2	0	1	3	5	0	5	0	1	0	0	3	3	5	5	0	11	9	10	30	1082	1	3	2	3	3	3	3	3	3	3	1	0	0	3	3	1	3	3	0	3	18
1083	17	2	1	suport_s	ACD, Het	2	Rajshahi	3	11	1	1	3	0	1	3	0	3	5	3	1	0	3	3	10	7	9	26	1083	1	1	1	1	1	1	1	0	0	1	1	1	1	1	1	1	0	1	1	0	16
1084	17	2	1	suport_s	ACD, Het	2	Rajshahi	3	11	1	0	3	3	3	0	0	1	1	3	1	1	3	3	7	5	10	22	1084	1	2	0	0	1	1	0	0	0	1	1	1	1	2	1	0	0	1	1	2	21
1085	17	2	1	suport_s	ACD, Het	2	Rajshahi	3	12	1	3	5	0	1	3	0	0	5	5	0	0	0	0	14	5	3	22	1085	3	1	1	3	0	0	0	0	0	0	0	1	3	3	0	0	0	0	3	3	22
1086	11	1	1	suport_s	ACD, Het	2	Rajshahi	3	11	1	5	1	5	3	0	1	0	5	5	5	3	1	5	18	7	14	39	1086	3	3	3	1	1	3	2	3	2	1	2	3	3	3	3	1	1	1	3	3	10
1087	16	2	1	suport_s	ACD, Het	2	Rajshahi	3	10	1	3	0	3	3	1	0	1	5	3	0	1	0	0	14	1	5	20	1087	1	2	1	0	0	0	2	1	0	2	1	3	3	0	0	0	0	2	3	1	13
1088	16	2	1	suport_s	ACD, Het	2	Rajshahi	3	11	1	1	3	3	3	1	3	1	3	1	1	1	1	0	8	8	6	22	1088	1	0	1	0	1	1	1	0	0	0	0	1	1	1	1	1	1	1	1	0	16
1089	16	2	1	suport_s	ACD, Het	2	Rajshahi	3	7	1	3	3	5	3	0	5	0	3	5	3	5	3	0	14	11	13	38	1089	2	0	0	0	0	1	0	0	0	2	2	1	1	1	2	1	2	1	0	0	8
1090	12	1	1	suport_s	ACD, Het	2	Rajshahi	3	12	1	3	1	3	3	0	0	1	3	0	3	1	0	3	9	5	8	22	1090	1	0	0	0	0	0	0	2	0	0	1	2	2	3	3	0	1	2	3	2	12
1091	16	2	1	suport_s	ACD, Het	2	Rajshahi	3	5	1	1	0	0	3	5	1	3	3	5	0	1	3	0	12	4	9	25	1091	1	0	0	0	0	0	0	1	0	0	1	1	2	0	0	0	0	1	0	1	33
1092	11	1	1	suport_s	ACD, Het	2	Rajshahi	3	3	1	3	1	0	0	0	0	1	3	1	1	0	0	0	7	3	0	10	1092	0	0	0	0	1	0	0	0	1	1	0	0	1	0	1	0	0	1	3	1	11
1093	14	2	1	suport_s	ACD, Het	2	Rajshahi	3	5	1	1	5	3	3	5	0	3	5	0	3	3	0	0	9	11	11	31	1093	0	0	1	0	1	0	0	0	0	2	3	1	0	0	0	0	1	0	1	2	30
1094	15	2	1	suport_s	ACD, Het	2	Rajshahi	4	0	1	3	3	1	0	0	5	0	3	0	0	3	3	0	6	8	8	22	1094	1	1	3	3	3	3	1	0	0	0	2	0	2	2	0	1	1	3	3	0	34
1095	15	2	1	suport_s	ACD, Het	2	Rajshahi	4	0	1	3	5	0	3	0	5	0	3	5	0	0	3	0	14	10	3	27	1095	1	1	3	3	2	3	1	0	0	0	2	2	3	1	0	1	2	3	3	3	48
1096	10	1	1	suport_s	ACD, Het	2	Rajshahi	4	0	1	3	5	0	5	0	1	0	0	3	1	3	3	0	11	7	6	24	1096	0	1	0	0	0	2	0	3	0	2	1	2	0	2	0	1	3	0	0	3	20
1097	10	1	1	suport_s	ACD, Het	2	Rajshahi	4	0	1	3	5	0	5	0	0	1	0	1	3	1	1	0	9	9	2	20	1097	1	2	0	0	0	2	0	3	1	1	1	0	0	0	3	2	1	0	0	3	27
1098	11	1	1	suport_s	ACD, Het	2	Rajshahi	1	4	1	3	0	0	1	3	5	0	1	3	0	3	0	0	8	5	6	19	1098	2	0	0	1	0	0	1	1	0	0	0	1	0	1	1	1	1	1	1	0	5
1099	16	2	1	suport_s	ACD, Het	2	Rajshahi	3	4	1	0	0	5	0	0	1	0	1	1	1	0	3	0	2	2	8	12	1099	3	2	1	0	1	0	2	3	0	3	2	1	2	1	3	2	1	1	3	2	7
1100	15	2	1	suport_s	ACD, Het	2	Rajshahi	2	0	1	3	5	0	0	5	1	5	5	0	1	0	0	0	8	12	5	25	1100	0	1	0	0	0	1	3	3	0	3	3	3	3	3	3	3	3	0	0	3	20
1101	17	2	1	suport_s	ACD, Het	2	Rajshahi	3	12	1	0	0	1	0	0	0	0	0	0	0	3	0	1	0	0	5	5	1101	1	0	0	1	0	0	0	0	0	1	0	1	0	0	0	0	0	0	0	3	11
1102	17	2	1	suport_s	ACD, Dro	2	Rajshahi	3	4	1	5	5	0	5	3	3	5	5	5	5	3	1	3	20	18	10	48	1102	2	1	0	0	0	0	0	1	0	1	2	0	1	0	0	0	0	1	0	2	20
1103	12	1	1	suport_s	ACD, Dro	2	Rajshahi	3	5	1	5	5	5	5	5	5	5	5	5	5	1	3	3	20	20	17	57	1103	3	0	2	2	0	2	0	3	1	3	1	3	0	3	0	1	3	3	0	0	13
1104	16	2	1	suport_s	ACD, Dro	2	Rajshahi	2	0	1	0	1	0	0	0	0	1	1	3	5	0	0	1	4	7	1	12	1104	1	1	2	0	1	2	2	1	2	1	2	0	1	0	1	1	0	0	0	2	10
1105	15	2	1	suport_s	ACD, Dro	2	Rajshahi	3	9	1	3	3	5	3	1	1	0	5	5	1	1	0	0	16	5	7	28	1105	2	0	1	1	1	1	0	1	0	3	1	1	1	2	1	1	0	1	2	0	11
1106	17	2	1	suport_s	ACD, Dro	2	Rajshahi	1	5	1	3	3	1	1	3	0	1	3	5	5	1	3	0	12	9	8	29	1106	1	3	0	1	0	1	1	0	0	1	0	1	3	2	0	1	0	0	1	1	8
1107	10	1	1	suport_s	ACD, Dro	2	Rajshahi	3	5	1	0	1	3	0	1	3	1	1	0	0	1	1	1	1	5	7	13	1107	1	1	0	0	0	1	0	1	0	1	1	0	1	1	0	1	0	0	1	1	6
1108	16	2	1	suport_s	ACD, Dro	2	Rajshahi	3	5	1	3	0	0	0	0	0	0	3	1	1	0	0	0	4	4	0	8	1108	0	0	0	0	0	1	0	1	0	3	0	0	1	0	1	0	0	1	0	3	8
1109	17	2	1	suport_s	ACD, Dro	2	Rajshahi	1	5	1	3	0	3	1	0	0	0	3	5	0	3	5	0	12	5	11	28	1109	0	1	0	0	0	0	1	0	0	1	0	0	0	0	1	1	0	0	3	0	23
1110	14	2	1	suport_s	ACD, Dro	2	Rajshahi	3	4	1	3	5	1	1	0	3	5	1	0	1	5	1	0	5	14	7	26	1110	1	0	0	0	0	0	0	2	0	2	0	1	0	0	1	2	3	0	0	1	20
1111	13	2	1	suport_s	ACD, Dro	2	Rajshahi	3	0	1	1	5	0	3	0	1	5	1	3	3	3	1	0	8	14	4	26	1111	1	1	1	1	1	1	1	1	1	1	1	1	1	1	1	1	1	1	1	1	16
1112	12	1	2	suport_s	ACD, Dro	2	Rajshahi	1	0	1	5	5	0	3	0	3	3	5	0	5	3	5	0	13	16	8	37	1112	0	3	2	0	0	3	2	3	0	2	2	2	0	2	0	2	2	0	0	3	9
1113	12	1	1	suport_s	ACD, Dro	2	Rajshahi	1	5	1	3	3	3	1	0	0	3	5	3	5	1	3	1	12	11	8	31	1113	1	1	1	0	0	0	1	0	0	0	0	1	0	0	1	0	1	1	0	1	23
1114	17	2	1	suport_s	ACD, Dro	2	Rajshahi	3	4	1	1	0	0	1	1	0	0	1	0	1	0	0	0	3	1	1	5	1114	0	0	0	0	0	2	1	0	0	0	0	0	0	1	0	1	1	0	1	1	17
1115	12	1	1	suport_s	ACD, Dro	2	Rajshahi	3	1	1	3	5	5	1	0	1	0	1	5	0	5	0	3	10	16	13	29	1115	1	0	0	1	0	0	0	2	1	3	0	1	0	0	1	3	0	1	0	2	22
1116	14	2	1	suport_s	ACD, Dro	2	Rajshahi	3	4	1	1	5	1	3	1	1	5	3	0	1	1	5	0	7	12	8	27	1116	0	2	0	0	1	2	0	0	0	1	1	2	3	0	1	3	2	1	0	3	13
1117	10	1	1	suport_s	ACD, Dro	2	Rajshahi	1	1	1	0	5	0	1	0	3	5	1	1	1	1	5	0	3	14	6	23	1117	0	1	0	0	0	0	0	0	0	1	0	1	0	0	0	1	1	0	0	0	17
1118	12	1	1	suport_s	ACD, Dro	2	Rajshahi	3	1	1	1	5	1	5	0	3	5	1	1	1	1	5	0	8	14	7	29	1118	0	1	2	0	0	0	1	0	0	2	0	2	0	0	0	2	3	0	0	0	17
1119	12	1	1	suport_s	ACD, Dro	2	Rajshahi	1	0	1	3	5	5	5	0	3	5	3	3	5	5	3	0	14	18	13	45	1119	0	1	2	0	0	0	2	2	0	2	2	2	1	2	2	2	0	1	0	2	13
1120	15	2	1	suport_s	ACD, Dro	2	Rajshahi	3	5	1	5	5	3	3	1	1	5	5	5	1	0	1	3	18	12	8	38	1120	1	0	2	0	2	1	1	0	0	1	1	2	2	1	0	0	0	1	2	0	15
1122	15	2	1	suport_s	ACD, Dro	2	Rajshahi	3	9	1	3	0	1	0	3	0	5	3	3	5	0	1	1	9	10	6	25	1122	1	1	0	0	0	1	0	0	0	3	1	1	1	0	0	0	1	1	1	3	20
1123	15	2	1	support_	ACD, Kat	2	Rajshahi	1	10	1	5	5	3	5	1	5	5	3	3	5	0	5	0	16	20	9	45	1123	3	0	2	0	1	3	1	1	0	0	2	2	3	0	0	0	1	2	2	0	13
1124	15	2	1	support_	ACD, Kat	2	Rajshahi	1	10	1	1	3	0	0	0	0	1	3	1	0	0	0	0	5	4	0	9	1124	1	0	0	0	0	1	0	1	0	0	1	0	1	0	0	1	1	2	1	3	19
1125	16	2	1	support_	ACD, Kat	2	Rajshahi	1	9	1	5	5	0	1	0	0	3	3	1	5	0	3	3	10	13	6	29	1125	1	0	1	2	2	1	0	0	0	2	1	2	2	0	1	1	0	1	2	0	37
1126	15	2	2	support_	ACD, Kat	2	Rajshahi	1	10	1	1	3	0	5	1	1	1	3	5	1	1	5	0	14	6	7	27	1126	1	1	0	1	3	3	2	1	2	2	3	1	1	3	2	1	3	2	2	3	15
1127	14	2	1	support_	ACD, Kat	2	Rajshahi	1	8	1	5	0	3	5	5	0	1	5	0	3	3	5	0	15	4	16	35	1127	1	0	1	0	0	2	0	0	0	0	1	1	3	0	0	0	0	0	3	1	31
1128	16	2	1	support_	ACD, Kat	2	Rajshahi	2	8	1	0	3	0	0	0	0	1	5	1	0	1	3	5	6	4	9	19	1128	1	1	1	1	0	0	0	1	0	1	0	0	1	1	1	0	0	0	1	0	11
1129	16	2	1	support_	ACD, Kat	2	Rajshahi	2	8	1	0	0	0	3	0	0	1	3	3	5	0	0	3	9	6	3	18	1129	0	1	0	0	0	1	0	0	0	0	1	0	0	3	1	0	0	0	1	3	16
1130	14	2	2	support_	ACD, Kat	2	Rajshahi	1	8	1	1	0	1	3	3	1	1	5	5	3	3	0	5	14	3	12	29	1130	1	3	2	3	2	1	0	1	2	3	2	1	2	3	1	0	1	2	1	0	33
1131	16	2	2	support_	ACD, Kat	2	Rajshahi	1	8	1	5	0	0	0	1	0	1	0	0	3	0	0	0	5	4	1	10	1131	1	1	0	0	3	1	0	3	0	0	0	0	1	0	2	0	0	0	1	2	20
1132	12	1	2	support_	ACD, Kat	2	Rajshahi	1	8	1	5	5	3	1	3	1	1	5	5	0	3	3	1	16	7	13	36	1132	1	0	2	2	3	3	1	1	1	1	2	1	2	3	1	1	2	2	2	2	5
1133	17	2	2	support_	ACD, Kat	2	Rajshahi	1	11	1	3	5	3	1	3	1	1	5	3	1	0	1	0	12	8	7	27	1133	1	0	2	1	2	1	0	2	0	0	1	2	2	2	0	0	1	0	1	2	40
1134	13	2	2	support_	ACD, Kat	2	Rajshahi	1	7	1	3	5	5	0	0	0	5	1	0	1	1	0	0	4	11	6	21	1134	0	0	1	0	1	0	0	0	0	1	0	0	1	0	0	0	0	1	0	0	12
1135	15	2	2	support_	ACD, Kat	2	Rajshahi	1	6	1	0	5	0	3	5	5	0	0	3	0	5	5	0	6	10	15	31	1135	2	1	2	1	3	1	3	3	1	2	1	3	2	2	3	1	3	1	3	2	20
1136	13	2	2	support_	ACD, Kat	2	Rajshahi	1	6	1	3	5	0	5	0	1	5	3	0	5	3	0	0	11	16	3	30	1136	1	0	1	0	0	0	1	1	0	2	0	0	1	3	0	0	1	0	0	1	21
1137	15	2	2	support_	ACD, Kat	2	Rajshahi	1	6	1	3	0	1	3	1	1	1	1	1	3	0	0	3	8	5	5	18	1137	0	1	1	0	0	1	1	0	2	2	3	3	1	3	0	0	1	1	0	0	17
1138	14	2	2	support_	ACD, Kat	2	Rajshahi	1	6	1	3	5	0	5	0	5	3	5	5	3	3	5	0	18	16	8	42	1138	1	1	1	0	0	1	1	0	2	2	3	3	1	3	0	0	0	1	0	1	14
1139	11	1	2	support_	ACD, Kat	2	Rajshahi	1	5	1	0	5	0	5	0	0	5	5	3	5	1	0	0	13	15	1	29	1139	0	1	1	0	2	1	0	1	2	0	1	0	1	1	2	1	0	0	0	3	9
1140	11	1	2	support_	ACD, Kat	2	Rajshahi	1	5	1	0	0	1	5	3	0	0	3	1	0	3	0	1	9	0	8	17	1140	0	1	1	0	0	1	0	0	0	0	1	1	1	0	0	0	1	1	1	0	16
1141	10	1	2	support_	ACD, Kat	2	Rajshahi	1	4	1	0	0	0	5	0	1	3	0	0	0	1	5	0	5	4	6	15	1141	0	1	0	0	0	0	1	2	0	3	1	1	0	0	1	0	1	0	2	3	19
1142	13	2	2	support_	ACD, Kat	2	Rajshahi	1	4	1	3	1	1	3	5	0	0	0	1	5	1	1	0	7	6	8	21	1142	0	0	1	0	0	0	0	3	0	1	0	1	2	0	0	3	0	0	0	3	5
1143	11	1	2	support_	ACD, Kat	2	Rajshahi	1	4	1	3	1	1	3	3	3	0	3	3	0	3	0	0	12	4	7	23	1143	0	0	1	0	1	1	0	3	0	1	1	1	2	1	1	2	0	1	2	1	19
1144	12	1	2	support_	ACD, Kat	2	Rajshahi	1	4	1	3	3	1	0	0	0	5	1	3	5	5	0	0	7	13	6	26	1144	0	0	0	0	0	1	0	0	0	0	0	1	0	0	0	1	1	0	1	0	19
1145	12	1	1	support_	ACD, Kat	2	Rajshahi	1	3	1	1	5	0	3	3	1	0	3	3	5	3	5	0	10	11	11	32	1145	0	1	2	0	2	1	0	1	1	0	1	1	2	1	1	0	2	1	0	2	24
1146	12	1	1	support_	ACD, Kat	2	Rajshahi	1	3	1	1	5	0	3	3	1	1	0	3	3	5	5	5	7	10	18	35	1146	0	1	2	0	2	1	0	2	1	0	2	2	2	2	2	1	2	0	0	2	10
1147	10	1	2	support_	ACD, Kat	2	Rajshahi	1	3	1	1	5	1	3	3	1	0	3	3	5	3	5	0	10	11	11	32	1147	0	1	2	0	2	1	0	2	1	0	1	1	1	1	1	2	1	0	0	2	20
1148	12	1	2	support_	ACD, Kat	2	Rajshahi	3	3	1	1	5	0	3	3	5	5	3	0	5	1	5	0	7	20	11	38	1148	0	0	1	0	0	2	1	0	2	1	1	0	2	1	1	2	1	0	0	2	22
1149	10	1	2	support_	ACD, Kat	2	Rajshahi	1	3	1	1	5	0	3	3	1	0	3	1	5	3	5	0	8	11	11	30	1149	0	1	2	0	2	1	0	3	1	0	1	1	1	1	1	2	1	0	0	2	21
1150	10	1	1	support_	ACD, Kat	2	Rajshahi	1	3	1	1	5	0	3	3	5	0	3	0	1	3	0	0	7	11	6	24	1150	0	1	2	0	0	2	1	0	2	1	0	1	1	1	1	2	0	3	2	1	41
1151	11	1	2	support_	ACD, Kat	2	Rajshahi	1	2	1	3	3	5	5	5	3	0	5	5	5	0	5	5	18	11	20	49	1151	0	3	3	3	3	1	3	3	0	3	3	3	0	0	3	3	1	3	3	0	42
1152	11	1	2	support_	ACD, Kat	2	Rajshahi	1	2	1	5	3	3	5	5	3	3	5	5	5	5	5	5	20	14	23	57	1152	0	1	3	3	3	3	3	3	0	3	3	3	0	3	3	3	2	0	0	3	39
1153	9	1	2	support_	ACD, Kat	2	Rajshahi	1	1	1	3	0	5	3	3	3	3	3	3	3	3	3	3	12	9	17	38	1153	2	2	2	2	3	2	2	3	2	3	3	3	0	0	2	3	2	0	0	3	48
1154	11	1	2	support_	ACD, Kat	2	Rajshahi	1	1	1	5	5	5	5	5	3	5	5	5	5	5	5	5	20	13	25	58	1154	3	3	3	3	3	3	3	3	3	3	3	3	0	0	3	3	3	0	0	3	8
1155	17	2	2	support_	ACD, Kat	2	Rajshahi	1	12	1	3	5	0	5	0	5	5	3	0	5	3	0	0	11	20	3	34	1155	0	0	1	0	1	2	0	0	0	0	2	1	3	2	0	0	1	0	2	2	19
1156	13	2	2	support_	ACD	2	Rajshahi	1	8	1	1	0	0	1	0	0	0	0	0	0	0	0	0	2	0	0	2	1156	0	1	3	0	0	0	0	3	0	0	1	0	0	0	0	0	0	0	1	1	10
1157	14	2	2	support_	ACD	2	Rajshahi	3	8	1	1	0	0	3	3	1	5	3	1	0	1	5	3	8	6	12	26	1157	0	1	0	1	0	0	2	3	0	3	0	2	0	0	2	1	1	2	1	3	19
1158	14	2	2	support_	ACD	2	Rajshahi	1	3	1	0	3	5	5	0	3	0	3	3	3	3	1	0	11	9	9	29	1158	0	0	0	0	1	1	0	2	0	0	1	1	0	0	1	0	1	0	0	2	2
1159	10	1	2	support_	ACD	2	Rajshahi	3	3	1	5	5	0	5	0	3	5	3	0	5	3	1	0	13	18	4	35	1159	1	0	0	0	0	0	0	0	0	0	0	3	0	0	1	0	1	0	0	0	22
1160	9	1	2	support_	ACD	2	Rajshahi	1	2	1	5	5	0	5	1	3	5	3	0	3	3	0	0	13	16	4	33	1160	1	0	3	0	0	0	0	0	0	0	0	3	0	0	0	0	1	0	0	0	21
1161	11	1	2	support_	ACD	2	Rajshahi	3	4	1	1	0	0	1	0	1	1	3	0	1	0	0	1	5	3	1	9	1161	1	1	1	0	0	1	1	3	1	1	1	1	3	1	0	1	1	0	1	3	12
1162	12	1	2	support_	ACD	2	Rajshahi	3	4	1	1	5	1	1	1	1	5	1	1	5	1	1	1	4	16	5	25	1162	1	0	0	0	1	1	0	1	1	1	1	2	1	1	1	1	0	2	1	3	20
1163	11	1	2	support_	ACD	2	Rajshahi	1	3	1	5	5	3	3	1	1	5	3	5	5	5	3	0	16	16	12	44	1163	1	1	3	0	1	1	0	0	0	1	1	2	3	0	0	0	0	1	3	3	0
1164	11	1	2	support_	ACD	2	Rajshahi	3	3	0	5	1	0	5	1	0	5	5	3	3	5	5	1	18	9	12	39	1164	3	2	0	0	0	2	1	2	3	0	2	2	1	0	1	2	1	0	0	3	52
1165	10	1	2	support_	ACD	2	Rajshahi	3	3	1	5	3	1	1	1	0	5	1	1	5	1	1	1	8	13	5	26	1165	1	1	0	1	0	0	0	1	0	0	2	1	0	0	1	1	1	0	1	1	12
1166	11	1	2	support_	ACD	2	Rajshahi	3	3	1	5	5	0	3	1	1	0	0	3	0	5	1	0	11	6	7	24	1166	1	0	0	0	0	1	0	0	0	0	1	0	1	0	0	0	1	1	3	3	7
1167	10	1	2	support_	ACD	2	Rajshahi	3	2	1	3	5	0	1	3	3	5	1	0	3	1	1	0	5	16	5	26	1167	1	0	1	0	1	0	1	0	0	0	0	1	0	0	1	0	1	0	0	0	26
1168	14	2	2	support_	ACD	2	Rajshahi	3	8	1	1	3	1	5	3	1	0	3	0	1	5	0	5	9	5	14	28	1168	2	1	1	0	0	1	1	2	0	1	1	2	0	1	2	1	0	1	2	1	20
1169	15	2	2	support_	ACD	2	Rajshahi	1	6	1	3	1	3	3	3	3	0	5	3	1	3	5	0	14	5	16	35	1169	1	1	1	0	0	1	1	1	2	1	1	1	2	2	0	0	1	2	0	1	26
1170	10	1	2	support_	ACD	2	Rajshahi	3	4	1	1	3	0	5	0	0	5	1	0	3	0	0	5	7	11	5	23	1170	0	2	3	0	0	2	1	3	0	1	2	1	1	0	1	2	1	2	3	1	22
1171	12	1	2	support_	ACD	2	Rajshahi	1	3	1	5	3	5	5	3	3	1	3	0	3	1	0	0	13	10	9	32	1171	1	0	0	0	0	0	0	1	0	0	0	0	0	0	0	0	0	0	0	0	30
1172	12	1	2	support_	ACD	2	Rajshahi	3	3	1	5	5	0	5	5	5	5	5	3	0	3	3	0	18	15	11	44	1172	1	1	3	0	0	1	0	0	0	1	1	2	3	0	0	0	0	1	3	3	34
1173	14	2	2	support_	ACD	2	Rajshahi	3	2	1	5	3	5	5	3	3	1	5	1	5	3	1	5	16	12	17	45	1173	1	2	2	2	2	2	2	2	2	2	1	1	2	1	2	2	1	2	1	2	10
1174	16	2	2	support_	ACD	2	Rajshahi	1	6	1	1	1	0	1	0	3	1	3	0	0	5	5	5	5	4	15	24	1174	1	2	0	1	2	3	2	1	2	0	2	1	1	1	2	0	1	1	3	0	11
1175	14	2	2	support_	ACD	2	Rajshahi	1	5	1	5	3	5	5	3	3	3	5	1	5	1	3	5	16	14	17	47	1175	1	1	2	2	2	2	2	3	0	1	0	3	1	1	2	3	2	0	0	2	21
1176	12	1	1	school	Shocheto	1	Rajshahi	1	6	1	1	5	0	5	0	5	5	5	1	1	0	1	0	11	16	1	28	1176	0	1	1	0	0	1	0	1	1	1	2	3	2	0	0	1	0	1	2	3	26
1177	11	1	1	school	Shocheto	1	Rajshahi	1	6	1	3	5	0	3	1	3	5	5	0	5	0	5	0	11	23	6	40	1177	1	0	1	0	0	2	1	1	0	0	2	0	3	2	0	0	0	3	0	3	12
1178	11	1	1	school	Shocheto	1	Rajshahi	1	5	1	0	3	5	3	0	1	3	1	0	3	1	5	0	4	10	11	25	1178	1	0	1	0	0	1	2	0	0	1	0	2	0	0	1	0	3	0	0	0	15
1179	11	1	2	school	Shocheto	1	Rajshahi	1	3	1	0	1	1	5	1	0	1	1	3	0	1	0	1	9	2	4	15	1179	0	1	1	0	0	1	0	2	0	1	2	0	1	1	0	1	0	2	2	0	23
1180	9	1	1	school	Shocheto	1	Rajshahi	1	0	1	0	3	5	3	0	5	0	5	5	3	1	3	0	13	12	9	34	1180	0	1	0	1	1	1	1	0	0	0	0	0	0	2	1	0	0	3	0	0	19
1181	11	1	1	school	Shocheto	1	Rajshahi	1	5	1	3	5	0	3	5	3	3	0	5	3	0	5	0	14	13	10	37	1181	2	0	0	0	0	2	1	0	2	0	3	1	2	0	0	2	3	2	3	0	7
1182	9	1	1	school	Shocheto	1	Rajshahi	1	2	1	0	0	0	0	1	0	1	3	3	5	1	3	0	6	6	5	17	1182	0	1	0	0	1	0	1	0	0	0	1	0	0	0	1	0	0	1	1	0	22
1183	12	1	1	school	Shocheto	1	Rajshahi	1	5	1	3	0	1	0	1	1	0	3	5	0	3	1	0	11	1	6	18	1183	1	2	2	0	0	1	3	1	2	0	2	3	0	3	1	0	1	0	1	3	17
1184	11	1	2	school	Shocheto	1	Rajshahi	1	5	1	1	3	0	5	0	1	0	3	0	0	0	3	0	9	4	3	16	1184	1	0	0	0	0	3	0	2	1	1	2	1	0	2	2	1	2	2	0	2	26
1185	10	1	1	school	Shocheto	1	Rajshahi	1	4	1	0	5	1	3	3	5	1	0	5	5	3	0	3	8	16	10	34	1185	0	1	2	0	0	3	0	1	3	2	0	3	2	0	2	1	3	0	3	0	22
1186	12	1	2	school	Shocheto	1	Rajshahi	1	5	1	5	5	1	1	0	1	0	1	0	0	0	1	0	7	6	2	15	1186	0	1	0	0	0	1	1	2	0	2	0	3	0	1	0	2	1	0	3	0	25
1187	10	1	2	school	Shocheto	1	Rajshahi	1	2	1	0	0	0	0	3	0	3	3	0	0	3	5	1	3	3	12	18	1187	1	2	3	1	1	2	1	1	2	0	1	0	0	2	1	0	1	2	0	1	23
1188	12	1	2	school	Shocheto	1	Rajshahi	1	3	1	0	3	1	1	5	0	1	3	5	1	0	0	3	9	5	9	23	1188	1	2	0	0	3	1	2	0	3	2	1	0	0	1	2	3	0	1	2	1	24
1189	11	1	2	school	Shocheto	1	Rajshahi	1	5	1	3	5	0	3	0	3	1	3	1	5	0	3	0	10	14	3	27	1189	1	1	0	0	0	1	1	1	2	3	1	0	2	1	1	1	3	0	1	3	26
1190	13	2	2	school	Shocheto	1	Rajshahi	1	7	1	3	0	0	5	5	1	0	5	5	0	3	1	0	18	1	9	28	1190	2	0	1	0	1	2	0	0	0	0	3	2	1	3	1	2	0	1	3	2	28
1191	14	2	2	school	Shocheto	1	Rajshahi	1	7	1	0	3	0	1	3	0	3	5	3	5	3	5	1	11	11	22	34	1191	1	0	2	0	0	0	1	0	0	2	3	1	3	3	2	1	1	3	2	3	18
1192	11	1	2	school	Shocheto	1	Rajshahi	1	5	1	5	5	1	5	3	5	5	5	1	5	1	1	1	16	20	7	43	1192	1	2	1	0	1	1	1	2	0	2	1	2	1	1	2	1	2	3	0	2	16
1193	9	1	2	school	Shocheto	1	Rajshahi	1	4	1	0	0	0	5	3	0	0	3	0	0	0	1	0	8	0	4	12	1193	1	0	0	0	0	1	0	1	2	2	0	2	3	1	0	0	1	0	1	1	19
1194	11	1	2	school	Shocheto	1	Rajshahi	1	3	1	0	0	0	0	0	0	0	0	0	0	0	0	0	0	0	0	0	1194	0	3	0	2	0	0	1	0	1	0	1	0	1	2	1	3	1	0	1	2	23
1195	13	2	2	school	Shocheto	1	Rajshahi	1	8	1	3	5	0	0	0	0	3	0	0	1	0	3	0	3	6	6	15	1195	1	0	1	1	2	1	2	1	0	1	2	1	2	1	0	0	0	0	1	1	31
1196	13	2	2	school	Shocheto	1	Rajshahi	1	8	1	3	5	1	0	0	0	0	3	0	0	0	3	0	6	5	4	15	1196	1	0	1	1	2	3	0	3	0	3	0	3	2	3	0	0	3	0	3	3	17
1197	12	1	2	school	Shocheto	1	Rajshahi	1	6	1	5	5	1	0	1	0	0	3	5	0	0	5	0	8	5	7	20	1197	1	1	0	0	1	1	0	0	1	2	1	0	0	2	0	1	1	3	1	1	26
1198	9	1	2	school	Shocheto	1	Rajshahi	1	0	1	0	5	1	0	1	5	0	5	5	0	1	5	0	10	10	8	28	1198	1	2	0	2	1	1	2	1	2	0	2	1	0	2	1	2	0	1	2	0	29
1199	11	1	2	school	Shocheto	1	Rajshahi	1	3	1	0	5	0	1	1	0	1	5	5	0	1	3	5	11	6	13	30	1199	1	0	2	3	1	0	2	3	2	1	1	2	3	0	0	1	3	1	0	3	30
1200	12	1	2	school	Shocheto	1	Rajshahi	1	5	1	0	5	1	1	0	0	0	0	5	0	1	3	0	6	5	5	16	1200	1	0	2	3	1	0	2	3	2	2	0	1	3	0	0	1	2	1	0	2	17
1201	12	1	2	school	Shocheto	1	Rajshahi	1	6	1	3	1	3	3	1	0	0	3	1	3	1	1	3	9	5	9	23	1201	1	0	1	0	0	1	3	0	1	1	1	0	1	2	0	1	0	1	2	1	21
1202	12	1	2	school	Shocheto	1	Rajshahi	1	5	1	1	3	3	1	3	5	1	3	1	0	0	5	0	6	9	11	26	1202	0	1	1	2	0	1	1	1	0	1	1	1	2	1	1	2	0	1	2	2	13
1203	13	2	2	school	Shocheto	1	Rajshahi	1	6	1	3	5	0	1	3	0	5	3	1	1	1	0	0	8	11	4	23	1203	0	0	1	0	2	3	0	0	1	0	1	0	1	2	0	1	0	0	0	1	18
1204	13	2	2	school	Shocheto	1	Rajshahi	1	6	1	1	5	3	5	1	3	1	5	5	0	0	3	0	16	9	7	32	1204	1	1	3	1	3	0	0	0	0	0	0	2	1	0	3	0	2	1	0	0	17
1205	13	2	2	school	Shocheto	1	Rajshahi	1	8	1	0	1	0	0	1	0	3	3	5	0	0	5	0	8	4	6	18	1205	1	2	0	0	0	1	0	1	0	1	1	2	2	1	0	0	1	1	2	1	28
1206	10	1	2	school	Shocheto	1	Rajshahi	1	3	1	5	5	1	3	0	0	5	5	5	0	0	1	0	18	10	2	30	1206	2	1	3	0	0	3	2	1	1	2	1	2	3	1	1	2	1	1	1	2	23
1207	13	2	2	school	Shocheto	1	Rajshahi	1	6	1	0	0	1	1	0	3	1	0	5	1	0	1	0	6	5	2	13	1207	1	0	0	1	0	1	0	1	2	1	2	3	2	1	3	2	0	3	3	2	22
1208	12	1	2	school	Shocheto	1	Rajshahi	1	6	1	1	5	3	5	0	1	3	3	0	0	0	0	0	9	9	3	21	1208	0	1	0	0	0	1	0	1	1	2	3	1	0	2	0	0	2	3	2	3	10
1209	10	1	1	school	Shocheto	1	Rajshahi	1	5	1	3	1	0	1	3	5	1	5	0	5	1	0	0	9	12	4	25	1209	0	0	0	0	1	1	2	0	3	2	3	1	3	0	2	0	3	2	0	0	16
1210	10	1	2	school	Shocheto	1	Rajshahi	1	6	1	0	1	0	3	5	1	0	5	0	1	3	0	1	8	3	9	20	1210	0	1	2	0	1	2	0	0	1	2	1	1	0	1	0	0	1	0	1	2	9
1211	10	1	2	school	Shocheto	1	Rajshahi	1	4	1	0	3	0	5	0	3	0	3	0	3	3	3	0	8	9	6	23	1211	0	2	0	0	0	0	0	3	0	0	0	0	1	0	0	0	0	0	0	3	19
1212	11	1	2	school	Shocheto	1	Rajshahi	1	5	1	3	1	1	5	5	1	3	1	0	1	1	1	3	9	6	11	26	1212	0	2	0	0	0	0	1	3	0	0	2	0	0	2	3	1	2	0	0	3	14
1213	13	2	2	school	Shocheto	1	Rajshahi	1	7	1	3	5	0	1	0	1	0	3	0	5	5	0	0	7	11	5	23	1213	1	1	1	0	0	1	0	0	0	1	0	1	0	1	0	0	0	1	0	2	12
1214	13	2	2	school	Shocheto	1	Rajshahi	1	7	1	1	3	0	1	3	1	1	1	1	3	0	0	0	4	8	9	15	1214	1	0	1	1	0	0	0	1	0	1	0	1	1	0	1	1	0	0	0	3	13
1215	13	2	2	school	Shocheto	1	Rajshahi	1	7	1	1	3	5	0	3	3	0	1	3	3	1	5	0	5	9	14	28	1215	0	1	1	0	0	0	1	1	0	1	1	2	1	0	1	1	1	0	0	1	5
1216	14	2	2	school	Shocheto	1	Rajshahi	1	8	1	3	5	3	0	0	0	0	0	0	5	3	5	0	3	10	11	24	1216	1	0	1	0	1	2	0	0	0	0	0	0	0	0	0	0	0	0	0	0	12
1217	11	1	2	school	Shocheto	1	Rajshahi	1	4	1	5	0	1	3	1	0	0	5	0	0	1	5	0	13	0	8	21	1217	1	0	1	0	0	2	0	1	2	1	1	1	0	2	0	0	1	0	0	1	16
1218	9	1	2	school	Shocheto	1	Rajshahi	1	3	1	3	5	0	1	3	3	5	3	0	0	3	0	0	7	13	6	26	1218	0	1	1	0	0	1	1	1	1	0	1	1	1	1	1	2	2	0	0	1	13
1219	12	1	2	school	Shocheto	1	Rajshahi	1	6	1	5	0	1	0	0	3	0	5	5	0	3	0	1	15	3	5	23	1219	0	2	0	3	1	0	0	1	0	1	1	0	0	2	0	1	0	0	0	0	20
1220	10	1	2	school	Shocheto	1	Rajshahi	1	3	1	3	0	0	3	3	3	3	0	3	0	1	0	0	9	6	4	19	1220	0	1	0	0	0	1	0	1	1	1	1	2	0	1	0	1	1	0	0	2	27
1221	12	1	1	school	Shocheto	1	Rajshahi	1	6	1	3	3	3	3	3	3	3	3	3	3	3	3	3	12	12	15	39	1221	1	1	1	1	1	1	1	1	1	1	1	1	1	1	1	1	1	1	1	1	23
1222	12	1	1	school	Shocheto	1	Rajshahi	1	6	1	5	3	0	0	0	1	1	3	0	3	1	0	0	8	8	1	17	1222	2	0	0	1	0	1	2	0	0	2	2	2	0	1	3	1	2	0	1	3	21
1223	11	1	1	school	Shocheto	1	Rajshahi	1	3	1	3	0	3	3	0	0	5	3	1	0	3	0	3	10	5	9	24	1223	1	0	1	2	3	3	1	3	0	3	1	2	0	2	0	3	1	0	0	1	9
1224	12	1	1	school	Shocheto	1	Rajshahi	1	6	1	3	5	0	3	0	1	1	0	5	0	1	5	1	11	7	7	25	1224	2	1	0	1	0	2	1	0	0	1	0	0	0	1	2	3	2	2	2	1	10
1225	13	2	1	school	Shocheto	1	Rajshahi	1	7	1	3	0	1	1	1	0	0	1	0	0	0	0	0	5	0	2	7	1225	0	1	0	0	0	1	0	0	0	0	0	0	0	1	1	2	0	0	3	1	10
1226	10	1	2	school	Shocheto	1	Rajshahi	1	3	1	3	0	1	0	5	0	3	5	0	0	3	1	5	8	3	12	23	1226	0	1	0	0	0	1	1	0	0	1	1	1	0	0	1	0	1	0	0	1	18
1227	10	1	2	school	Shocheto	1	Rajshahi	1	4	1	1	0	0	1	3	0	1	0	3	0	0	1	0	5	1	4	10	1227	1	0	1	0	0	0	0	1	0	3	3	0	2	3	0	0	0	1	0	3	16
1228	9	1	2	school	Shocheto	1	Rajshahi	1	1	1	5	0	1	1	1	1	0	0	0	1	3	0	1	6	2	6	14	1228	1	1	1	1	1	1	1	1	1	0	1	3	0	0	0	1	1	0	0	1	24
1229	16	2	1	school	Shocheto	1	Rajshahi	1	10	1	0	1	0	3	1	3	0	0	1	1	3	1	0	4	5	5	14	1229	0	1	0	0	0	0	1	0	2	3	1	0	1	0	0	2	2	0	2	3	19
1230	15	2	1	school	Shocheto	1	Rajshahi	1	8	1	1	3	0	1	3	0	1	1	3	0	1	3	0	6	4	7	17	1230	0	1	0	1	1	2	0	0	0	1	2	1	1	0	1	1	2	1	3	1	24
1231	12	1	2	school	Shocheto	1	Rajshahi	1	3	1	5	0	1	1	0	3	0	1	0	0	0	0	0	7	3	1	11	1231	0	1	0	0	0	0	0	2	0	0	3	1	0	0	0	0	1	0	0	2	21
1232	12	1	2	school	Shocheto	1	Rajshahi	1	5	1	3	5	0	1	0	5	0	3	0	0	3	5	0	7	10	8	25	1232	1	2	1	2	1	2	2	0	0	0	2	1	0	2	1	0	2	0	0	2	16
1233	12	1	2	school	Shocheto	1	Rajshahi	1	8	1	5	0	1	1	1	1	0	0	0	1	3	0	1	6	2	6	14	1233	1	1	1	1	1	1	1	1	1	0	1	3	0	0	0	1	1	0	0	1	12
1234	13	2	2	school	Shocheto	1	Rajshahi	1	8	1	0	3	0	3	1	0	0	0	0	1	0	0	0	3	4	1	8	1234	1	1	1	0	1	1	1	1	0	0	0	1	1	1	0	0	0	0	1	1	17
1235	9	1	2	school	Shocheto	1	Rajshahi	1	7	1	0	5	1	3	0	3	5	3	3	1	1	3	0	9	14	5	28	1235	1	2	0	0	3	0	0	1	0	1	3	2	1	1	1	2	1	2	2	1	27
1236	12	1	2	school	Shocheto	1	Rajshahi	1	6	1	0	0	3	5	1	0	5	5	5	0	0	1	0	10	5	5	20	1236	1	0	0	0	1	2	0	3	0	0	1	1	1	2	1	0	2	1	0	1	7
1237	12	1	2	school	Shocheto	1	Rajshahi	1	5	1	1	3	0	1	0	5	0	1	0	1	0	5	0	3	9	5	17	1237	0	1	0	0	1	0	0	1	0	0	0	1	0	0	0	0	1	0	1	1	27
1238	12	1	2	school	Shocheto	1	Rajshahi	1	6	1	3	5	0	3	0	3	1	1	0	5	3	3	0	7	14	6	27	1238	1	1	0	0	1	1	0	1	2	2	1	2	2	3	2	0	2	1	2	3	31
1239	11	1	2	school	Shocheto	1	Rajshahi	1	6	1	3	0	5	1	1	5	3	1	0	1	3	1	1	5	9	11	25	1239	1	1	2	0	1	1	0	3	1	1	2	1	1	1	2	0	2	2	2	3	21
1240	11	1	2	school	Shocheto	1	Rajshahi	1	6	1	3	5	1	3	1	0	1	3	1	0	1	1	1	10	6	5	21	1240	1	1	1	0	1	0	2	2	0	0	2	3	0	0	0	1	1	2	2	2	28
1241	11	1	2	school	Shocheto	1	Rajshahi	1	6	1	1	0	1	3	0	3	0	3	1	1	1	3	0	8	4	5	12	1241	1	0	0	1	0	0	2	3	1	3	1	1	3	1	3	1	3	0	1	3	10
1242	12	1	2	school	Shocheto	1	Rajshahi	1	6	1	3	5	5	3	1	0	0	0	3	0	3	1	0	14	5	10	29	1242	3	1	3	1	0	1	2	1	1	2	2	3	1	2	1	1	2	1	2	1	20
1243	11	1	2	school	Shocheto	1	Rajshahi	1	7	1	3	1	1	0	1	0	0	3	0	3	0	0	0	6	4	2	12	1243	0	1	1	0	0	0	0	1	1	0	0	1	1	0	0	0	1	0	1	2	16
1244	14	2	2	school	Shocheto	1	Rajshahi	1	7	1	3	5	1	3	1	5	0	1	0	1	3	0	0	7	11	5	23	1244	1	2	1	1	1	2	1	3	0	0	0	1	2	0	0	1	1	0	1	2	13
1245	13	2	2	school	Shocheto	1	Rajshahi	1	6	2	5	3	0	3	1	3	5	5	0	3	0	1	1	13	14	3	30	1245	1	2	1	0	1	2	0	1	0	3	1	2	1	0	2	0	2	1	0	1	5
1246	11	1	1	school	Shocheto	1	Rajshahi	1	6	1	1	5	5	3	0	0	5	3	1	0	5	0	0	8	10	10	28	1246	1	0	1	0	0	1	1	1	0	1	0	1	0	1	2	0	1	2	2	1	16
1247	11	1	1	school	Shocheto	1	Rajshahi	1	8	1	1	1	0	0	0	3	0	3	0	0	0	1	0	4	4	1	9	1247	1	0	0	0	1	1	0	3	1	0	1	2	1	0	1	2	0	0	1	1	5
1248	12	1	1	school	Shocheto	1	Rajshahi	1	7	1	5	5	1	1	1	5	0	3	0	0	1	0	1	9	10	6	25	1248	2	1	0	0	1	1	0	1	0	2	1	1	0	0	0	0	0	2	1	0	25
1249	13	2	1	school	Shocheto	1	Rajshahi	1	7	1	5	5	3	3	0	5	5	1	5	3	1	0	1	14	18	5	37	1249	1	0	0	0	0	2	1	0	2	2	0	2	1	2	2	3	2	2	2	1	8
1250	12	1	1	school	Shocheto	1	Rajshahi	1	6	1	3	5	3	0	0	5	0	0	5	0	0	1	0	8	10	4	22	1250	1	1	0	0	0	0	0	0	0	0	0	1	1	0	0	0	1	1	1	1	10
1251	12	1	1	school	Shocheto	1	Rajshahi	1	7	1	3	0	0	5	0	0	0	0	3	1	0	0	0	11	1	0	12	1251	1	1	0	0	0	1	0	0	0	1	2	1	0	0	1	0	0	0	1	1	17
1252	12	1	1	school	Shocheto	1	Rajshahi	1	8	1	1	3	3	0	1	3	0	1	3	3	0	0	1	5	9	5	19	1252	1	0	1	0	1	1	1	0	0	1	1	1	1	1	1	0	2	1	0	3	21
1253	13	2	1	school	Shocheto	1	Rajshahi	1	8	1	5	0	1	3	3	0	0	3	0	0	0	5	3	11	0	12	23	1253	1	1	1	0	0	3	1	0	1	1	1	1	1	1	1	2	1	1	1	2	18
1254	13	2	1	school	Shocheto	1	Rajshahi	1	8	1	5	0	5	3	5	1	5	5	0	5	5	0	5	13	11	20	44	1254	2	2	0	0	1	0	0	0	3	3	0	3	0	0	0	0	1	0	3	0	12
1255	14	2	1	school	Shocheto	1	Rajshahi	1	9	1	1	5	0	1	3	3	0	3	3	1	0	0	0	8	9	3	20	1255	1	0	0	0	1	1	0	1	0	0	1	1	1	0	0	0	0	2	1	2	29
1256	16	2	2	school	Shocheto	1	Rajshahi	1	3	1	5	5	1	3	5	1	0	5	1	0	0	1	0	14	6	7	27	1256	1	2	1	1	2	1	1	1	3	0	0	3	0	2	2	1	2	0	0	1	13
1258	11	1	2	school	Shocheto	1	Rajshahi	1	3	1	5	0	0	0	0	0	3	0	0	0	0	0	0	5	3	0	8	1258	0	2	0	0	0	0	0	0	0	0	0	0	0	0	2	0	0	0	0	1	16
1259	9	1	2	school	Shocheto	1	Rajshahi	1	5	1	1	0	1	3	3	0	0	0	0	0	0	0	0	4	0	4	8	1259	1	0	3	1	0	0	0	0	0	0	1	1	2	0	2	0	2	0	0	3	9
1260	11	1	2	school	Shocheto	1	Rajshahi	1	3	1	1	5	0	3	0	1	0	0	1	0	0	1	0	5	6	1	12	1260	1	1	1	0	1	0	1	0	0	0	0	1	0	1	2	0	0	0	0	0	9
1261	9	1	1	school	Shocheto	1	Rajshahi	1	4	1	1	3	0	5	0	5	0	3	3	0	1	0	1	12	8	2	22	1261	0	1	0	0	0	0	2	2	0	0	0	0	0	1	0	1	0	0	0	2	7
1262	9	1	2	school	Shocheto	1	Rajshahi	1	4	1	3	0	5	5	5	1	5	3	1	1	1	0	3	12	7	14	33	1262	0	1	0	0	0	0	1	1	0	0	0	1	0	1	0	0	1	0	0	1	0
1263	11	1	1	school	Shocheto	1	Rajshahi	1	4	1	5	0	0	3	0	0	0	0	0	0	0	0	0	8	0	0	8	1263	0	0	0	0	0	0	0	0	0	0	0	0	0	0	0	0	0	0	0	0	5
1264	11	1	1	school	Shocheto	1	Rajshahi	1	4	1	3	5	3	0	0	1	5	0	0	0	3	0	1	3	11	7	21	1264	0	3	0	0	0	0	0	0	0	0	0	0	0	0	0	1	0	0	0	1	17
1265	11	1	2	school	Shocheto	1	Rajshahi	1	4	1	3	1	0	1	1	0	3	0	1	1	3	0	1	5	5	5	15	1265	0	3	0	2	0	0	1	3	0	0	0	2	0	0	0	1	1	0	1	3	10
1266	9	1	1	school	Shocheto	1	Rajshahi	1	5	1	3	1	5	3	1	1	0	0	0	0	1	0	1	6	2	8	16	1266	1	1	0	1	0	1	0	1	0	0	0	1	0	1	1	0	1	0	0	1	22
1269	10	1	2	school	Shocheto	1	Rajshahi	1	3	1	3	1	0	0	0	5	0	1	0	0	0	1	1	4	6	2	12	1269	1	0	1	2	3	1	3	2	1	0	0	0	1	2	3	1	0	0	0	1	17
1270	10	1	2	school	Shocheto	1	Rajshahi	1	5	1	3	5	1	3	1	5	0	1	1	0	1	1	0	8	10	4	22	1270	1	1	1	2	0	0	0	3	0	0	0	2	0	0	1	2	1	0	0	3	16
1271	10	1	2	school	Shocheto	1	Rajshahi	1	5	1	5	1	0	3	1	3	5	1	5	3	0	3	1	16	12	5	33	1271	2	1	0	0	0	2	1	0	0	0	0	2	0	2	0	1	0	2	2	1	14
1272	12	1	1	school	Shocheto	1	Rajshahi	1	5	1	5	3	0	3	1	5	5	3	3	0	0	3	0	14	13	4	31	1272	3	0	0	1	2	3	2	1	2	1	3	1	2	1	0	1	0	1	2	3	21
1273	12	1	2	school	Shocheto	1	Rajshahi	1	5	1	3	1	1	0	0	0	0	3	0	5	3	3	0	6	6	7	19	1273	1	0	3	0	1	0	2	1	0	2	1	0	0	3	0	0	1	3	0	3	17
1274	11	1	1	school	Shocheto	1	Rajshahi	1	5	1	0	5	1	3	0	3	0	1	3	0	3	0	3	6	8	7	21	1274	1	1	0	1	0	0	1	1	2	0	0	1	0	0	1	3	1	0	0	1	27
1275	11	1	2	school	Shocheto	1	Rajshahi	1	5	1	5	0	3	1	0	5	0	5	3	0	3	1	1	14	5	8	27	1275	1	3	1	0	0	2	1	3	1	0	1	1	0	2	3	2	3	0	0	3	15
1276	11	1	2	school	Shocheto	1	Rajshahi	1	5	1	1	0	3	1	1	0	0	1	0	0	0	0	0	3	0	4	7	1276	1	1	2	0	0	0	0	0	0	0	1	1	0	1	1	2	2	0	0	3	4
1277	11	1	2	school	Shocheto	1	Rajshahi	1	5	1	0	5	5	0	5	5	0	5	0	5	3	0	0	5	15	13	23	1277	0	2	0	0	0	0	0	0	0	0	0	0	0	0	0	1	1	0	0	0	16
1278	11	1	2	school	Shocheto	1	Rajshahi	1	5	1	1	5	0	3	0	5	0	1	0	0	1	0	0	5	10	1	16	1278	0	1	0	0	0	1	2	1	0	0	1	2	2	0	0	1	2	1	0	2	4
1279	11	1	2	school	Shocheto	1	Rajshahi	1	5	1	3	5	0	0	3	5	5	0	0	0	1	1	0	3	15	5	23	1279	1	0	1	0	1	0	1	0	0	0	0	0	0	0	0	0	0	0	0	0	10
1280	10	1	2	school	Shocheto	2	Rajshahi	1	0	1	0	5	0	0	0	0	1	0	5	3	1	0	1	5	9	2	16	1280	0	0		0	0	0	0	0	0	0											18
1281	10	1	2	school	Shocheto	1	Rajshahi	1	5	1	3	0	0	3	0	5	1	5	0	0	1	3	0	11	6	4	21	1281	1	0	2	1	0	0	1	0	0	0	1	0	0	1	1	1	0	0	0	1	13
1282	10	1	2	support_	ACD, Hor	2	Rajshahi	1	1	2	0	5	0	0	0	0	1	0	0	5	5	0	0	6	10	0	16	1282	0	1	3	0	0	0	0	0	1	1	0	1	0	3	0	1	1	0	0	0	0
1283	9	1	2	support_	ACD, Hor	2	Rajshahi	1	6	1	3	0	1	3	3	1	0	5	3	1	5	1	0	14	2	10	26	1283	0	2	2	2	2	0	0	0	0	0	1	1	1	2	0	1	1	1	1	1	26
1284	12	1	2	support_	ACD, Hor	2	Rajshahi	1	9	1	5	0	5	5	3	1	5	1	0	0	1	0	0	13	6	9	28	1284	1	1	2	0	0	1	1	1	1	2	1	1	0	1	1	2	2	1	1	1	23
1285	15	2	2	support_	ACD, Hor	2	Rajshahi	1	8	1	0	0	5	3	5	0	0	3	0	0	3	0	3	6	0	16	22	1285	0	1	1	0	0	0	0	0	0	2	0	0	0	0	0	0	1	2	1	3	19
1286	15	2	2	support_	ACD, Hor	2	Rajshahi	1	6	1	3	0	3	1	5	1	0	1	3	3	5	3	0	8	4	16	28	1286	0	1	2	1	1	1	1	2	2	1	1	1	1	1	1	1	1	0	0	0	28
1287	14	2	2	support_	ACD, Hor	2	Rajshahi	1	7	1	5	1	5	3	0	3	0	5	5	0	1	1	5	18	4	12	34	1287	2	0	1	2	1	1	2	1	1	1	2	0	0	1	1	3	1	1	0	2	24
1288	16	2	2	support_	ACD, Hor	2	Rajshahi	1	5	1	3	0	1	3	0	5	1	3	0	1	5	1	0	9	7	7	23	1288	2	1	2	0	1	2	0	0	1	1	2	3	1	0	1	2	3	2	1	3	12
1289	13	2	2	support_	ACD, Hor	2	Rajshahi	1	5	1	1	0	1	5	5	1	0	3	1	5	0	5	5	10	6	16	32	1289	2	1	0	2	1	0	3	1	0	0	1	0	3	1	0	3	1	2	1	2	28
1290	11	1	2	support_	ACD, Hor	2	Rajshahi	1	5	2	3	0	0	0	0	0	0	0	0	0	0	0	0	3	0	0	3	1290	0	0	0	0	0	0	0	0	0	0	0	0	0	0	0	0	0	0	0	0	24
1291	17	2	2	support_	ACD, Hor	2	Rajshahi	1	7	2	3	0	3	3	1	0	0	5	3	3	5	5	0	14	3	14	31	1291	0	3	3	3	0	1	1	0	2	3	1	3	0	0	1	3	0	0	0	0	18
1292	16	2	2	support_	ACD, Hor	2	Rajshahi	1	4	2	5	0	3	3	0	3	0	1	0	5	5	5	0	9	8	13	30	1292	2	0	3	0	0	1	1	1	0	0	1	1	1	1	1	1	1	1	1	1	10
1293	14	2	2	support_	ACD, Hor	2	Rajshahi	1	6	1	3	1	3	3	1	0	0	5	3	3	5	5	0	4	3	14	31	1293	0	3	3	3	0	0	1	0	2	3	1	1	0	1	1	3	3	0	0	3	22
1294	12	1	2	support_	ACD, Hor	2	Rajshahi	1	5	2	0	5	0	0	0	5	0	1	1	3	0	5	0	2	13	3	18	1294	1	0	3	0	1	0	1	0	3	0	0	0	0	1	0	0	0	0	0	1	9
1295	10	1	2	support_	ACD, Hor	2	Rajshahi	3	3	2	1	3	0	5	0	3	1	1	1	0	5	5	0	8	7	10	25	1295	1	2	1	0	2	1	1	1	3	0	0	1	1	1	0	2	0	0	0	2	21
1296	11	1	2	support_	ACD, Hor	2	Rajshahi	1	4	2	5	5	0	5	5	5	5	5	5	3	5	5	0	20	18	15	53	1296	2	3	3	0	0	2	2	0	3	0	0	3	0	3	0	0	0	0	0	3	17
1297	13	2	2	support_	ACD, Hor	2	Rajshahi	1	3	2	3	3	0	1	1	3	3	5	5	0	3	5	0	12	18	15	45	1297	0	3	2	0	0	0	0	1	1	0	0	0	0	1	0	0	0	0	0	1	27
1298	9	1	2	support_	ACD, Hor	2	Rajshahi	1	5	2	5	5	0	3	5	5	5	1	3	3	5	5	0	14	9	9	32	1298	2	3	0	1	0	1	1	1	1	0	0	2	0	1	1	0	0	0	0	3	18
1299	11	1	2	support_	ACD, Hor	2	Rajshahi	2	4	2	0	3	0	1	1	3	5	5	0	3	5	0	0	6	14	6	26	1299	0	3	3	0	0	0	0	1	1	0	0	0	0	1	0	0	0	0	0	1	19
1300	9	1	2	support_	ACD, Hor	2	Rajshahi	1	2	2	0	5	0	0	0	5	5	0	3	5	5	0	0	3	20	5	28	1300	0	1	3	2	2	0	0	3	0	0	0	0	0	3	0	0	1	0	0	3	17
1301	11	1	2	support_	ACD, Hor	2	Rajshahi	1	2	2	0	5	0	0	0	3	0	0	3	5	5	0	0	3	13	5	21	1301	0	1	3	1	3	1	1	1	2	1	0	1	0	1	0	0	1	0	0	0	25
1302	9	1	2	support_	AFS,DHAK	2	Dhaka	1	2	1	1	5	0	5	5	5	3	5	5	0	1	3	5	16	13	9	38	1302	1	1	0	0	0	1	1	3	2	0	0	3	1	1	3	2	1	3	0	3	15
1303	11	1	2	support_	AFS,DHAK	2	Dhaka	1	2	1	1	0	3	3	5	3	0	5	1	5	0	5	0	10	8	13	31	1303	0	0	2	0	1	0	1	3	1	0	1	1	0	0	3	0	0	0	0	2	34
1304	9	1	2	support_	AFS,DHAK	2	Dhaka	1	0	1	3	0	1	3	5	5	1	3	3	0	5	5	5	12	6	19	37	1304	1	1	3	1	0	1	1	3	2	2	3	3	1	3	1	0	3	2	0	3	33
1305	9	1	2	support_	AFS,DHAK	2	Dhaka	1	0	0	1	3	3	3	3	3	5	0	3	5	5	3	0	7	16	14	37	1305	0	0	2	0	1	0	0	2	0	2	1	0	3	0	0	0	0	1	0	1	25
1306	14	2	2	support_	AFS,DHAK	2	Dhaka	1	5	1	5	5	3	1	5	0	5	5	3	5	3	5	0	14	15	16	45	1306	1	1	1	0	1	1	1	1	0	3	1	1	2	3	1	0	0	1	0	3	23
1307	17	2	2	school	ULAB,Dha	2	Dhaka	1	8	1	1	5	3	3	0	1	0	1	0	1	1	0	0	5	7	4	16	1307	1	0	1	0	1	0	0	1	1	1	1	1	0	1	0	0	0	1	1	1	8
1308	13	2	2	school	ULAB,Dha	1	Dhaka	1	8	1	1	3	3	3	3	1	1	3	3	1	3	0	3	10	6	12	28	1308	1	2	1	1	0	0	1	1	1	0	2	0	2	0	0	1	1	2	1	0	17
1309	14	2	2	school	ULAB,Dha	1	Dhaka	1	8	1	1	0	3	0	1	3	0	0	5	5	0	1	0	6	8	5	19	1309	0	0	2	0	2	1	0	1	1	0	1	1	1	2	0	0	1	0	1	3	21
1310	13	2	2	school	ULAB,Dha	1	Dhaka	1	8	1	3	5	1	0	3	0	3	1	0	0	5	0	5	4	8	14	26	1310	1	1	2	1	0	1	3	3	0	0	0	0	0	0	1	2	3	0	3	0	4
1311	13	2	1	school	ULAB,Dha	1	Dhaka	1	8	1	3	0	1	1	1	0	0	3	0	1	1	0	0	7	1	3	11	1311	1	0	0	0	0	0	0	0	0	2	0	0	0	0	0	0	0	0	0	1	8
1312	14	2	1	school	ULAB,Dha	1	Dhaka	1	8	1	0	0	0	0	0	0	0	0	0	0	0	0	0	0	0	0	0	1312	0	0	1	1	1	1	0	1	0	1	0	1	0	0	0	0	0	0	0	1	8
1313	12	1	1	school	ULAB,Dha	1	Dhaka	1	8	1	0	0	1	1	0	5	0	3	0	0	0	3	3	4	5	7	16	1313	1	0	1	0	0	0	0	1	0	0	0	1	0	1	0	0	0	0	2	1	21
1314	14	2	1	school	ULAB,Dha	1	Dhaka	1	5	1	5	0	1	3	5	0	0	3	5	1	0	0	0	16	1	6	23	1314	1	0	1	2	0	1	0	0	0	1	0	2	3	0	1	2	0	3	3	1	11
1315	10	1	1	school	ULAB,Dha	1	Dhaka	1	5	1	0	0	5	0	0	3	0	1	0	0	5	3	0	1	3	13	17	1315	2	0	3	0	2	0	0	1	0	0	0	1	0	0	2	0	0	0	1	1	42
1316	12	1	1	school	ULAB,Dha	1	Dhaka	1	5	1	0	5	1	0	1	1	0	0	1	0	0	1	0	1	6	3	10	1316	0	0	3	1	0	2	0	0	0	0	1	0	0	0	0	0	0	0	1	3	24
1317	11	1	1	school	ULAB,Dha	1	Dhaka	1	5	1	5	0	5	5	5	5	5	5	5	5	5	3	5	20	15	23	58	1317	3	3	3	0	3	3	1	2	0	3	3	3	3	2	1	2	1	2	2	2	1
1318	9	1	1	school	ULAB,Dha	1	Dhaka	1	5	1	0	0	0	0	0	0	0	0	0	0	0	0	0	0	0	0	0	1318	0	0	0	0	0	0	0	1	0	0	0	0	0	0	0	0	0	0	0	0	7
1319	12	1	2	school	ULAB,Dha	1	Dhaka	1	5	1	3	5	5	3	3	3	5	3	1	5	5	3	0	10	18	16	44	1319	2	0	0	2	0	2	2	3	0	1	0	1	0	1	2	1	2	1	1	3	17
1320	10	1	2	school	ULAB,Dha	1	Dhaka	1	5	1	3	0	0	1	1	3	3	5	0	1	0	0	0	9	7	1	17	1320	0	1	0	0	0	1	0	1	0	0	1	1	0	0	0	0	0	0	0	2	12
1321	11	1	1	school	ULAB,Dha	1	Dhaka	1	5	1	3	5	1	3	1	0	1	3	0	5	0	0	0	9	11	2	22	1321	1	0	1	0	1	1	0	2	0	1	1	1	0	0	0	0	1	0	0	2	9
1322	12	1	1	school	ULAB,Dha	1	Dhaka	1	5	1	3	5	1	3	1	1	5	3	1	3	1	1	3	10	14	7	31	1322	1	1	1	0	0	1	1	0	0	0	1	2	1	2	1	1	1	2	0	1	39
1323	10	1	1	school	ULAB,Dha	1	Dhaka	1	5	1	1	0	1	1	0	1	1	0	0	0	1	0	0	2	2	4	8	1323	1	0	1	0	1	0	0	1	0	0	1	0	0	1	0	2	0	0	0	1	6
1324	10	1	1	school	ULAB,Dha	1	Dhaka	1	5	1	3	0	0	1	1	0	0	5	0	1	0	5	0	9	1	6	16	1324	0	0	0	0	0	1	0	0	0	0	2	2	0	0	0	0	0	1	0	0	41
1325	10	1	1	school	ULAB,Dha	1	Dhaka	1	5	1	5	5	1	3	1	3	5	5	3	5	1	3	0	16	18	8	42	1325	3	0	3	3	2	1	1	3	1	2	3	3	2	3	2	1	2	3	1	2	8
1326	13	2	1	school	ULAB,Dha	1	Dhaka	1	5	1	5	0	3	5	0	0	0	5	3	5	0	5	3	18	5	11	34	1326	3	0	3	3	3	3	1	1	2	2	3	3	3	2	0	3	1	2	1	0	22
1327	11	1	1	school	ULAB,Dha	1	Dhaka	1	5	1	3	0	0	5	3	1	0	1	1	0	0	0	3	10	1	6	17	1327	0	0	1	0	1	0	1	0	0	0	1	1	0	1	0	1	0	1	0	0	21
1328	12	1	1	school	ULAB,Dha	1	Dhaka	1	5	1	1	0	5	3	3	3	5	1	5	5	3	3	3	10	13	7	40	1328	2	1	3	0	1	1	0	3	0	0	0	1	2	1	0	1	2	1	0	3	9
1329	11	1	1	school	ULAB,Dha	1	Dhaka	1	5	1	1	3	1	3	3	1	0	5	5	1	1	3	1	14	5	9	28	1329	2	1	0	1	1	1	1	0	0	2	1	1	1	2	1	2	1	1	0	2	32
1330	10	1	1	school	ULAB,Dha	1	Dhaka	1	5	1	0	5	3	0	0	0	5	0	3	5	0	5	0	3	15	8	26	1330	0	2	0	2	3	0	0	3	0	3	1	0	3	2	2	0	2	3	3	3	27
1331	12	1	2	support_	SOS Shis	2	Dhaka	1	10	1	0	5	0	5	0	5	5	5	0	0	5	0	5	10	15	10	35	1331	2	0	1	0	1	1	2	2	1	3	2	0	0	2	2	0	0	2	2	0	27
1332	16	2	2	support_	SOS Shis	2	Dhaka	1	4	1	1	5	1	1	0	3	0	3	5	1	0	0	1	10	9	2	21	1332	1	0	1	3	1	0	1	0	0	0	0	0	0	0	0	1	0	0	0	0	6
1333	13	2	2	support_	SOS Shis	2	Dhaka	1	3	1	0	0	1	1	3	0	1	3	5	3	0	1	3	9	4	8	21	1333	1	0	2	1	0	2	0	2	3	1	0	2	1	2	3	1	2	1	1	2	34
1334	10	1	2	support_	SOS Shis	2	Dhaka	1	4	1	1	0	3	3	0	1	0	3	3	3	1	0	1	1	17	0	18	1334	1	3	1	1	0	0	2	2	3	3	1	2	2	2	1	3	2	1	1	2	9
1335	10	1	2	support_	SOS Shis	2	Dhaka	1	10	1	0	0	5	0	1	0	0	0	0	0	3	0	3	0	0	12	12	1335	1	1	2	0	0	0	0	0	0	2	0	0	1	1	0	0	0	1	0	0	29
1336	16	2	2	support_	SOS Shis	2	Dhaka	1	3	1	1	0	5	5	1	3	0	5	3	5	0	0	0	11	8	9	28	1336	0	0	0	0	0	0	2	0	0	0	0	0	0	0	0	0	2	2	0	0	28
1337	10	1	2	support_	SOS Shis	2	Dhaka	1	4	1	1	1	5	0	0	0	3	3	1	3	3	5	1	5	7	15	27	1337	3	0	2	1	2	0	0	2	3	1	2	0	1	2	3	1	2	1	1	2	1
1338	12	1	2	support_	SOS Shis	2	Dhaka	1	6	1	1	0	1	3	3	0	3	0	1	0	5	3	0	4	3	12	19	1338	1	3	2	1	0	2	2	2	3	3	1	2	2	0	1	3	2	1	1	2	12
1339	14	2	2	support_	SOS Shis	2	Dhaka	1	4	1	3	0	5	5	0	3	0	3	5	5	3	5	0	16	8	16	40	1339	1	2	3	0	2	1	0	0	0	0	0	1	1	0	0	0	0	1	0	0	22
1340	11	1	2	support_	SOS Shis	2	Dhaka	1	5	1	0	3	0	1	0	0	0	3	3	0	0	0	0	7	3	0	10	1340	1	0	0	0	0	0	0	0	0	0	0	0	0	0	0	0	0	0	0	0	21
1341	11	1	2	support_	SOS Shis	2	Dhaka	1	5	1	0	1	3	5	5	0	5	0	3	5	3	1	3	8	11	15	34	1341	0	1	0	2	3	3	1	0	0	1	0	0	2	1	2	1	0	1	1	2	16
1342	9	1	2	support_	SOS Shis	2	Dhaka	1	4	1	1	0	5	5	0	3	0	0	0	0	0	0	1	6	3	6	15	1342	1	0	3	1	1	0	1	0	2	0	2	1	0	2	0	0	2	0	0	0	16
1343	11	1	2	support_	SOS Shis	2	Dhaka	1	5	1	3	1	3	1	3	5	1	1	1	3	5	1	0	6	10	12	28	1343	1	1	2	1	1	1	0	0	0	1	1	1	1	1	1	0	1	1	1	0	19
1344	12	1	2	support_	SOS Shis	2	Dhaka	1	7	1	3	1	3	1	5	5	1	1	1	5	5	1	1	9	12	15	36	1344	1	1	2	2	1	1	1	1	0	1	1	1	1	1	1	0	1	2	1	2	22
1345	13	2	2	support_	SOS Shis	2	Dhaka	1	7	1	1	5	3	1	1	3	0	3	0	0	1	3	3	5	9	14	28	1345	1	1	2	1	2	1	2	1	1	1	1	1	0	1	1	1	1	1	0	2	15
1346	14	2	2	support_	SOS Shis	2	Dhaka	1	7	1	1	5	3	0	0	0	1	3	5	3	1	1	0	9	9	2	20	1346	1	2	1	0	0	1	0	0	0	1	0	3	1	2	1	0	1	0	1	0	11
1347	14	2	2	support_	SOS Shis	2	Dhaka	1	0	1	3	1	3	1	0	0	3	1	3	3	1	0	0	8	6	4	18	1347	1	1	1	0	1	0	0	1	0	0	1	1	0	0	0	1	0	1	1	1	11
1348	14	2	2	support_	SOS Shis	2	Dhaka	1	10	1	1	0	0	0	0	0	0	0	0	0	0	0	0	1	0	0	1	1348	1	0	1	0	1	1	0	0	0	1	1	1	1	1	1	0	0	0	1	0	7
1349	16	2	2	support_	SOS Shis	2	Dhaka	1	10	1	5	5	3	5	5	5	5	5	5	5	3	3	0	20	20	17	57	1349	2	0	1	2	2	2	0	1	0	3	0	2	3	3	1	1	1	2	1	1	23
1350	16	2	2	support_	SOS Shis	2	Dhaka	1	5	1	0	5	5	5	0	5	5	0	5	5	5	0	5	10	20	15	45	1350	2	0	3	0	1	3	0	0	1	3	2	0	0	2	2	0	0	2	2	0	4
1351	16	2	2	support_	SOS Shis	2	Dhaka	1	7	1	0	5	1	0	3	5	0	0	0	0	0	0	0	0	10	4	14	1351	0	0	1	1	0	0	0	0	0	0	0	1	1	0	0	0	0	0	0	0	5
1352	14	2	2	support_	SOS Shis	2	Dhaka	1	4	1	0	3	0	0	0	0	3	0	0	0	0	0	0	0	6	0	6	1352	0	0	0	0	0	0	0	2	0	0	0	0	0	0	1	0	0	2	2	0	21
1353	11	1	2	support_	SOS Shis	2	Dhaka	1	7	1	1	5	3	3	1	3	0	5	3	3	1	0	0	12	11	5	28	1353	1	1	2	1	2	1	0	0	1	2	1	1	0	1	1	1	1	1	0	1	10
1354	14	2	2	support_	SOS Shis	2	Dhaka	1	11	1	5	5	5	3	3	3	5	5	5	5	5	5	5	18	18	23	59	1354	1	1	2	2	1	2	1	0	0	1	0	2	1	1	1	1	1	1	1	1	5
1355	17	2	2	support_	SOS Shis	2	Dhaka	1	9	1	1	5	1	0	0	0	0	0	0	0	1	0	0	1	5	1	7	1355	0	1	1	0	0	0	0	1	0	0	0	0	1	1	0	0	0	0	0	0	27
1356	17	2	2	support_	SOS Shis	2	Dhaka	1	8	1	5	5	5	5	5	5	5	5	3	3	1	1	1	18	18	10	46	1356	3	0	3	0	3	3	0	0	0	0	3	3	3	0	3	3	0	0	0	0	14
1357	16	2	2	support_	SOS Shis	2	Dhaka	1	3	1	1	3	0	1	3	5	3	1	3	3	0	3	1	6	14	7	27	1357	0	1	3	0	0	0	0	0	0	2	0	0	1	3	0	1	0	0	3	0	8
1358	12	1	2	support_	SOS Shis	2	Dhaka	1	2	1	3	0	0	3	0	0	1	1	0	0	0	0	0	10	1	0	11	1358	1	0	1	0	0	0	0	1	0	0	0	1	0	0	0	0	1	0	0	0	5
1359	10	1	2	support_	SOS Shis	2	Dhaka	1	3	1	3	5	5	0	0	0	5	1	0	3	0	0	0	4	15	5	24	1359	0	1	1	0	0	0	1	1	0	0	0	1	0	0	0	1	3	0	1	0	15
1360	10	1	1	support_	SOS Shis	2	Dhaka	1	6	1	0	3	5	1	0	1	0	1	3	1	0	0	1	5	5	6	16	1360	1	0	0	0	0	1	2	0	0	0	1	1	2	2	0	0	0	3	2	0	37
1361	14	2	2	support_	SOS Shis	2	Dhaka	1	5	1	0	3	0	0	0	0	1	0	0	1	1	0	0	0	5	1	6	1361	1	0	0	0	1	0	0	0	0	0	0	0	1	0	0	0	0	1	0	1	9
1362	13	2	2	support_	SOS Shis	2	Dhaka	1	4	1	0	0	0	0	0	0	0	0	0	0	0	0	0	0	0	0	0	1362	1	1	1	1	0	1	0	1	0	1	0	1	0	0	0	0	0	0	0	1	26
1363	10	1	2	support_	SOS Shis	2	Dhaka	1	5	1	0	0	5	3	5	5	0	5	3	5	3	0	1	11	10	14	35	1363	3	0	3	0	3	3	1	2	0	2	1	3	2	3	2	2	1	2	1	3	18
1364	13	2	2	support_	SOS Shis	2	Dhaka	1	3	1	3	1	5	1	0	0	5	5	3	1	3	0	5	12	7	13	32	1364	1	2	3	0	0	0	0	1	3	3	2	1	2	0	2	0	3	0	3	0	13
1365	9	1	2	support_	SOS Shis	2	Dhaka	1	4	1	3	5	1	0	0	0	5	5	0	0	1	5	0	8	10	7	25	1365	0	1	0	1	0	0	1	0	1	3	1	1	1	0	0	1	2	2	1	2	9
1366	13	2	2	support_	SOS Shis	2	Dhaka	1	4	1	0	1	0	0	0	0	0	1	0	3	5	0	0	1	4	5	10	1366	1	0	1	0	0	1	0	0	0	1	1	1	1	1	0	0	0	1	1	3	10
1367	11	1	2	support_	SOS Shis	2	Dhaka	1	2	1	1	0	1	0	0	0	3	5	0	3	5	0	5	6	6	11	21	1367	0	1	1	1	0	1	0	2	0	1	0	1	0	0	0	0	0	0	0	1	3
1368	11	1	1	support_	SOS Shis	2	Dhaka	1	6	1	0	5	1	0	3	5	0	0	0	0	0	0	0	0	10	4	14	1368	0	0	0	1	1	0	0	0	0	0	0	0	1	0	0	0	0	0	0	0	13
1369	9	1	1	support_	SOS Shis	2	Dhaka	1	6	1	5	0	0	0	3	0	0	3	0	5	1	1	0	8	5	5	18	1369	1	2	1	0	0	1	2	0	0	2	1	2	0	0	0	0	0	1	0	0	25
1370	9	1	1	support_	SOS Shis	2	Dhaka	1	5	1	3	0	3	1	0	3	1	1	1	3	0	0	1	6	7	4	17	1370	1	1	2	3	2	2	2	1	0	1	1	1	0	1	1	1	1	2	1	1	14
1371	13	2	1	support_	SOS Shis	2	Dhaka	1	3	1	3	1	3	1	0	0	0	0	0	3	0	0	0	4	4	3	11	1371	1	1	1	0	1	0	1	0	0	0	0	1	0	0	0	1	0	1	1	1	18
1372	10	1	2	support_	SOS Shis	2	Dhaka	1	4	1	3	1	3	1	0	0	0	0	0	3	0	0	0	4	4	3	11	1372	1	1	1	0	1	0	1	3	0	0	1	1	0	0	0	1	0	1	1	1	10
1373	10	1	2	support_	SOS Shis	2	Dhaka	1	3	1	3	1	3	1	0	0	0	0	0	3	0	0	0	4	4	3	11	1373	1	1	1	0	1	0	0	0	0	0	1	1	0	0	0	1	0	1	1	1	10
1374	10	1	2	support_	SOS Shis	2	Dhaka	1	3	1	1	3	0	3	3	5	3	1	3	3	0	3	1	8	14	7	29	1374	0	1	1	0	0	0	1	1	0	0	0	1	0	0	0	1	3	0	1	0	22
1375	10	1	2	support_	SOS Shis	2	Dhaka	1	4	1	0	3	1	5	1	0	0	1	3	0	1	3	1	9	3	7	19	1375	0	2	3	0	3	3	1	0	2	0	1	1	2	0	0	2	1	0	0	1	11
1376	17	2	2	support_	SOS Shis	2	Dhaka	1	4	1	0	5	1	0	0	5	0	1	0	0	0	1	1	1	10	3	14	1376	0	0	0	1	0	0	1	3	0	3	0	0	0	0	0	0	0	0	0	0	15
1377	10	1	2	support_	SOS Shis	2	Dhaka	1	8	1	3	1	3	1	1	3	3	1	3	3	1	0	0	7	10	5	22	1377	1	1	1	0	1	0	0	1	0	0	1	1	0	0	0	1	0	1	1	1	24
1378	14	2	2	support_	SOS Shis	2	Dhaka	1	8	1	0	0	3	1	0	5	0	5	1	5	0	1	1	7	10	5	22	1378	1	2	1	3	1	0	0	0	0	1	1	2	0	0	0	0	1	0	2	3	15
1379	14	2	2	support_	SOS Shis	2	Dhaka	1	9	1	1	5	3	1	0	0	3	0	0	1	1	1	1	2	3	7	12	1379	1	0	1	1	1	1	0	0	0	1	2	2	0	2	1	0	1	0	1	0	28
1380	16	2	2	support_	SOS Shis	2	Dhaka	1	8	1	3	5	0	1	3	0	0	1	3	1	0	0	0	8	6	0	14	1380	1	0	0	0	1	0	1	1	1	0	1	1	2	0	0	1	0	0	2	3	0
[truncated: 34 more columns]
